# Supplementary material for: The Human Extracellular Matrix Diseasome Reveals Genotype-Phenotype Associations with Clinical Implications for Age-Related Diseases
Source: Preprints.org preprint supplement (doi:10.20944/preprints202303.0192.v1), 2023-03-10
Supplement: Supplementary file 1 [file supplementary]

## Sheet: Table_S6Monarch_diseases_data
division	category	Gene Symbol	Gene Name	geneid	Species	Disease	Synonyms	HGNC_IDs Links	UniProt_IDs	Refseq_IDs
Core matrisome	Collagens	COL10A1	collagen, type X, alpha 1	2185	Homo sapiens	Schmid metaphyseal chondrodysplasia	-	2185	Q03692:Q5QPC7:Q5QPC8	NP_000484.2:XP_006715395.1:XP_006715396.1
Core matrisome	Collagens	COL11A1	collagen, type XI, alpha 1	2186	Homo sapiens	autosomal dominant myopia-midfacial retrusion-sensorineural hearing loss-rhizomelic dysplasia syndrome	CO11A1|COLL6|STL2	2186	C9JMN2:H7C381:P12107	NP_001177638.1:NP_001845.3:NP_542196.2:NP_542197.3
Core matrisome	Collagens	COL11A1	collagen, type XI, alpha 1	2186	Homo sapiens	autosomal recessive Stickler syndrome	CO11A1|COLL6|STL2	2186	C9JMN2:H7C381:P12107	NP_001177638.1:NP_001845.3:NP_542196.2:NP_542197.3
Core matrisome	Collagens	COL11A1	collagen, type XI, alpha 1	2186	Homo sapiens	fibrochondrogenesis	CO11A1|COLL6|STL2	2186	C9JMN2:H7C381:P12107	NP_001177638.1:NP_001845.3:NP_542196.2:NP_542197.3
Core matrisome	Collagens	COL11A1	collagen, type XI, alpha 1	2186	Homo sapiens	fibrochondrogenesis 1	CO11A1|COLL6|STL2	2186	C9JMN2:H7C381:P12107	NP_001177638.1:NP_001845.3:NP_542196.2:NP_542197.3
Core matrisome	Collagens	COL11A1	collagen, type XI, alpha 1	2186	Homo sapiens	Marshall syndrome	CO11A1|COLL6|STL2	2186	C9JMN2:H7C381:P12107	NP_001177638.1:NP_001845.3:NP_542196.2:NP_542197.3
Core matrisome	Collagens	COL11A1	collagen, type XI, alpha 1	2186	Homo sapiens	Stickler syndrome type 2	CO11A1|COLL6|STL2	2186	C9JMN2:H7C381:P12107	NP_001177638.1:NP_001845.3:NP_542196.2:NP_542197.3
Core matrisome	Collagens	COL11A2	collagen, type XI, alpha 2	2187	Homo sapiens	autosomal dominant nonsyndromic deafness	DFNA13|DFNB53|HKE5|PARP|STL3	2187	A2AAS7:H0Y3B3:H0Y3B5:H0Y3M9:H0YHM5:H0YHM9:H0YIS1:P13942:Q4VXY6	NP_001157243.1:NP_542411.2:NP_542412.2:NP_542410.2:NP_542412.2
Core matrisome	Collagens	COL11A2	collagen, type XI, alpha 2	2187	Homo sapiens	autosomal dominant nonsyndromic deafness 13	DFNA13|DFNB53|HKE5|PARP|STL3	2187	A2AAS7:H0Y3B3:H0Y3B5:H0Y3M9:H0YHM5:H0YHM9:H0YIS1:P13942:Q4VXY6	NP_001157243.1:NP_542411.2:NP_542412.2:NP_542410.2:NP_542412.2
Core matrisome	Collagens	COL11A2	collagen, type XI, alpha 2	2187	Homo sapiens	autosomal recessive nonsyndromic deafness	DFNA13|DFNB53|HKE5|PARP|STL3	2187	A2AAS7:H0Y3B3:H0Y3B5:H0Y3M9:H0YHM5:H0YHM9:H0YIS1:P13942:Q4VXY6	NP_001157243.1:NP_542411.2:NP_542412.2:NP_542410.2:NP_542412.2
Core matrisome	Collagens	COL11A2	collagen, type XI, alpha 2	2187	Homo sapiens	autosomal recessive nonsyndromic deafness 53	DFNA13|DFNB53|HKE5|PARP|STL3	2187	A2AAS7:H0Y3B3:H0Y3B5:H0Y3M9:H0YHM5:H0YHM9:H0YIS1:P13942:Q4VXY6	NP_001157243.1:NP_542411.2:NP_542412.2:NP_542410.2:NP_542412.2
Core matrisome	Collagens	COL11A2	collagen, type XI, alpha 2	2187	Homo sapiens	fibrochondrogenesis	DFNA13|DFNB53|HKE5|PARP|STL3	2187	A2AAS7:H0Y3B3:H0Y3B5:H0Y3M9:H0YHM5:H0YHM9:H0YIS1:P13942:Q4VXY6	NP_001157243.1:NP_542411.2:NP_542412.2:NP_542410.2:NP_542412.2
Core matrisome	Collagens	COL11A2	collagen, type XI, alpha 2	2187	Homo sapiens	fibrochondrogenesis 2	DFNA13|DFNB53|HKE5|PARP|STL3	2187	A2AAS7:H0Y3B3:H0Y3B5:H0Y3M9:H0YHM5:H0YHM9:H0YIS1:P13942:Q4VXY6	NP_001157243.1:NP_542411.2:NP_542412.2:NP_542410.2:NP_542412.2
Core matrisome	Collagens	COL11A2	collagen, type XI, alpha 2	2187	Homo sapiens	otospondylomegaepiphyseal dysplasia	DFNA13|DFNB53|HKE5|PARP|STL3	2187	A2AAS7:H0Y3B3:H0Y3B5:H0Y3M9:H0YHM5:H0YHM9:H0YIS1:P13942:Q4VXY6	NP_001157243.1:NP_542411.2:NP_542412.2:NP_542410.2:NP_542412.2
Core matrisome	Collagens	COL11A2	collagen, type XI, alpha 2	2187	Homo sapiens	otospondylomegaepiphyseal dysplasia, autosomal recessive	DFNA13|DFNB53|HKE5|PARP|STL3	2187	A2AAS7:H0Y3B3:H0Y3B5:H0Y3M9:H0YHM5:H0YHM9:H0YIS1:P13942:Q4VXY6	NP_001157243.1:NP_542411.2:NP_542412.2:NP_542410.2:NP_542412.2
Core matrisome	Collagens	COL11A2	collagen, type XI, alpha 2	2187	Homo sapiens	Stickler syndrome type 3	DFNA13|DFNB53|HKE5|PARP|STL3	2187	A2AAS7:H0Y3B3:H0Y3B5:H0Y3M9:H0YHM5:H0YHM9:H0YIS1:P13942:Q4VXY6	NP_001157243.1:NP_542411.2:NP_542412.2:NP_542410.2:NP_542412.2
Core matrisome	Collagens	COL11A2	collagen, type XI, alpha 2	2187	Homo sapiens	Weissenbacher-Zweymuller syndrome	DFNA13|DFNB53|HKE5|PARP|STL3	2187	A2AAS7:H0Y3B3:H0Y3B5:H0Y3M9:H0YHM5:H0YHM9:H0YIS1:P13942:Q4VXY6	NP_001157243.1:NP_542411.2:NP_542412.2:NP_542410.2:NP_542412.2
Core matrisome	Collagens	COL12A1	collagen, type XII, alpha 1	2188	Homo sapiens	Bethlem myopathy	BA209D8.1|COL12A1L|DJ234P15.1	2188	D6RGG3:H0Y4P7:H0Y5N9:H0Y991:Q99715	NP_004361.3:NP_542376.2
Core matrisome	Collagens	COL12A1	collagen, type XII, alpha 1	2188	Homo sapiens	Bethlem myopathy 2	BA209D8.1|COL12A1L|DJ234P15.1	2188	D6RGG3:H0Y4P7:H0Y5N9:H0Y991:Q99715	NP_004361.3:NP_542376.2
Core matrisome	Collagens	COL12A1	collagen, type XII, alpha 1	2188	Homo sapiens	Ullrich congenital muscular dystrophy	BA209D8.1|COL12A1L|DJ234P15.1	2188	D6RGG3:H0Y4P7:H0Y5N9:H0Y991:Q99715	NP_004361.3:NP_542376.2
Core matrisome	Collagens	COL13A1	collagen, type XIII, alpha 1	2190	Homo sapiens	congenital myasthenic syndrome 19	COLXIIIA1|FLJ42485	2190	E7ES46:E7ES47:E7ES49:E7ES50:E7ES51:E7ES55:E7ES56:E7EX21:E9PEG9:G5E987:H7BYT9:H7BZB6:Q5TAT6	NP_001123575.1:NP_542988.3:NP_542990.3:NP_542991.3:NP_542992.3:NP_542995.3
Core matrisome	Collagens	COL13A1	collagen, type XIII, alpha 1	2190	Homo sapiens	postsynaptic congenital myasthenic syndrome	COLXIIIA1|FLJ42485	2190	E7ES46:E7ES47:E7ES49:E7ES50:E7ES51:E7ES55:E7ES56:E7EX21:E9PEG9:G5E987:H7BYT9:H7BZB6:Q5TAT6	NP_001123575.1:NP_542988.3:NP_542990.3:NP_542991.3:NP_542992.3:NP_542995.3
Core matrisome	Collagens	COL13A1	collagen, type XIII, alpha 1	2190	Homo sapiens	presynaptic congenital myasthenic syndrome	COLXIIIA1|FLJ42485	2190	E7ES46:E7ES47:E7ES49:E7ES50:E7ES51:E7ES55:E7ES56:E7EX21:E9PEG9:G5E987:H7BYT9:H7BZB6:Q5TAT6	NP_001123575.1:NP_542988.3:NP_542990.3:NP_542991.3:NP_542992.3:NP_542995.3
Core matrisome	Collagens	COL14A1	collagen, type XIV, alpha 1	2191	Homo sapiens	punctate palmoplantar keratoderma type 1	UND	2191	H0YBB2:J3QT75:J3QT83:Q05707:Q4G0W3	NP_066933.1:XP_005251116.1:XP_006716714.1
Core matrisome	Collagens	COL17A1	collagen, type XVII, alpha 1	2194	Homo sapiens	epithelial recurrent erosion dystrophy	BA16H23.2|BP180|BPAG2|FLJ60881|KIAA0204|LAD-1	2194	A2A2Y8:H0Y420:Q9UMD9	NP_000485.3
Core matrisome	Collagens	COL17A1	collagen, type XVII, alpha 1	2194	Homo sapiens	generalized junctional epidermolysis bullosa non-Herlitz type	BA16H23.2|BP180|BPAG2|FLJ60881|KIAA0204|LAD-1	2194	A2A2Y8:H0Y420:Q9UMD9	NP_000485.3
Core matrisome	Collagens	COL17A1	collagen, type XVII, alpha 1	2194	Homo sapiens	junctional epidermolysis bullosa, non-Herlitz type	BA16H23.2|BP180|BPAG2|FLJ60881|KIAA0204|LAD-1	2194	A2A2Y8:H0Y420:Q9UMD9	NP_000485.3
Core matrisome	Collagens	COL17A1	collagen, type XVII, alpha 1	2194	Homo sapiens	late-onset junctional epidermolysis bullosa	BA16H23.2|BP180|BPAG2|FLJ60881|KIAA0204|LAD-1	2194	A2A2Y8:H0Y420:Q9UMD9	NP_000485.3
Core matrisome	Collagens	COL17A1	collagen, type XVII, alpha 1	2194	Homo sapiens	localized junctional epidermolysis bullosa, non-Herlitz type	BA16H23.2|BP180|BPAG2|FLJ60881|KIAA0204|LAD-1	2194	A2A2Y8:H0Y420:Q9UMD9	NP_000485.3
Core matrisome	Collagens	COL18A1	collagen, type XVIII, alpha 1	2195	Homo sapiens	Knobloch syndrome	FLJ27325|FLJ34914|KNO|KNO1|MGC74745	2195	H7BXV5:H7C457:P39060	NP_085059.2:NP_569712.2
Core matrisome	Collagens	COL1A1	collagen, type I, alpha 1	2197	Homo sapiens	Caffey disease	OI4	2197	I3L3H7:P02452	NP_000079.2
Core matrisome	Collagens	COL1A1	collagen, type I, alpha 1	2197	Homo sapiens	Ehlers-Danlos syndrome, arthrochalasis type	OI4	2197	I3L3H7:P02452	NP_000079.2
Core matrisome	Collagens	COL1A1	collagen, type I, alpha 1	2197	Homo sapiens	Ehlers-Danlos syndrome, classic type	OI4	2197	I3L3H7:P02452	NP_000079.2
Core matrisome	Collagens	COL1A1	collagen, type I, alpha 1	2197	Homo sapiens	Ehlers-Danlos/osteogenesis imperfecta syndrome	OI4	2197	I3L3H7:P02452	NP_000079.2
Core matrisome	Collagens	COL1A1	collagen, type I, alpha 1	2197	Homo sapiens	high bone mass osteogenesis imperfecta	OI4	2197	I3L3H7:P02452	NP_000079.2
Core matrisome	Collagens	COL1A1	collagen, type I, alpha 1	2197	Homo sapiens	osteogenesis imperfecta type 1	OI4	2197	I3L3H7:P02452	NP_000079.2
Core matrisome	Collagens	COL1A1	collagen, type I, alpha 1	2197	Homo sapiens	osteogenesis imperfecta type 2	OI4	2197	I3L3H7:P02452	NP_000079.2
Core matrisome	Collagens	COL1A1	collagen, type I, alpha 1	2197	Homo sapiens	osteogenesis imperfecta type 3	OI4	2197	I3L3H7:P02452	NP_000079.2
Core matrisome	Collagens	COL1A1	collagen, type I, alpha 1	2197	Homo sapiens	osteogenesis imperfecta type 4	OI4	2197	I3L3H7:P02452	NP_000079.2
Core matrisome	Collagens	COL1A2	collagen, type I, alpha 2	2198	Homo sapiens	ehlers-danlos syndrome, arthrochalasia type, 2	OI4	2198	P08123	NP_000080.2
Core matrisome	Collagens	COL1A2	collagen, type I, alpha 2	2198	Homo sapiens	Ehlers-Danlos syndrome, arthrochalasis type	OI4	2198	P08123	NP_000080.2
Core matrisome	Collagens	COL1A2	collagen, type I, alpha 2	2198	Homo sapiens	Ehlers-Danlos syndrome, cardiac valvular type	OI4	2198	P08123	NP_000080.2
Core matrisome	Collagens	COL1A2	collagen, type I, alpha 2	2198	Homo sapiens	Ehlers-Danlos/osteogenesis imperfecta syndrome	OI4	2198	P08123	NP_000080.2
Core matrisome	Collagens	COL1A2	collagen, type I, alpha 2	2198	Homo sapiens	high bone mass osteogenesis imperfecta	OI4	2198	P08123	NP_000080.2
Core matrisome	Collagens	COL1A2	collagen, type I, alpha 2	2198	Homo sapiens	osteogenesis imperfecta type 1	OI4	2198	P08123	NP_000080.2
Core matrisome	Collagens	COL1A2	collagen, type I, alpha 2	2198	Homo sapiens	osteogenesis imperfecta type 2	OI4	2198	P08123	NP_000080.2
Core matrisome	Collagens	COL1A2	collagen, type I, alpha 2	2198	Homo sapiens	osteogenesis imperfecta type 3	OI4	2198	P08123	NP_000080.2
Core matrisome	Collagens	COL1A2	collagen, type I, alpha 2	2198	Homo sapiens	osteogenesis imperfecta type 4	OI4	2198	P08123	NP_000080.2
Core matrisome	Collagens	COL25A1	collagen, type XXV, alpha 1	18603	Homo sapiens	congenital ptosis (disease)	CLAC|CLACP	18603	A8MWQ5:D6R8Y2:E9PNV9:H0YAE1:Q9BXS0	NP_001243003.1:NP_115907.2:NP_942014.1
Core matrisome	Collagens	COL25A1	collagen, type XXV, alpha 1	18603	Homo sapiens	Duane retraction syndrome	CLAC|CLACP	18603	A8MWQ5:D6R8Y2:E9PNV9:H0YAE1:Q9BXS0	NP_001243003.1:NP_115907.2:NP_942014.1
Core matrisome	Collagens	COL25A1	collagen, type XXV, alpha 1	18603	Homo sapiens	fibrosis of extraocular muscles, congenital, 5	CLAC|CLACP	18603	A8MWQ5:D6R8Y2:E9PNV9:H0YAE1:Q9BXS0	NP_001243003.1:NP_115907.2:NP_942014.1
Core matrisome	Collagens	COL27A1	collagen, type XXVII, alpha 1	22986	Homo sapiens	Steel syndrome	FLJ11895|KIAA1870|MGC11337	22986	H0YD40:Q5T1U7:Q8IZC6	NP_116277.2
Core matrisome	Collagens	COL2A1	collagen, type II, alpha 1	2200	Homo sapiens	achondrogenesis type II	ANFH|AOM|COL11A3|MGC131516|SEDC	2200	P02458	NP_001835.3:NP_149162.2
Core matrisome	Collagens	COL2A1	collagen, type II, alpha 1	2200	Homo sapiens	autosomal dominant rhegmatogenous retinal detachment	ANFH|AOM|COL11A3|MGC131516|SEDC	2200	P02458	NP_001835.3:NP_149162.2
Core matrisome	Collagens	COL2A1	collagen, type II, alpha 1	2200	Homo sapiens	avascular necrosis of femoral head, primary, 1	ANFH|AOM|COL11A3|MGC131516|SEDC	2200	P02458	NP_001835.3:NP_149162.2
Core matrisome	Collagens	COL2A1	collagen, type II, alpha 1	2200	Homo sapiens	Czech dysplasia, metatarsal type	ANFH|AOM|COL11A3|MGC131516|SEDC	2200	P02458	NP_001835.3:NP_149162.2
Core matrisome	Collagens	COL2A1	collagen, type II, alpha 1	2200	Homo sapiens	dysspondyloenchondromatosis	ANFH|AOM|COL11A3|MGC131516|SEDC	2200	P02458	NP_001835.3:NP_149162.2
Core matrisome	Collagens	COL2A1	collagen, type II, alpha 1	2200	Homo sapiens	familial avascular necrosis of femoral head	ANFH|AOM|COL11A3|MGC131516|SEDC	2200	P02458	NP_001835.3:NP_149162.2
Core matrisome	Collagens	COL2A1	collagen, type II, alpha 1	2200	Homo sapiens	hypochondrogenesis	ANFH|AOM|COL11A3|MGC131516|SEDC	2200	P02458	NP_001835.3:NP_149162.2
Core matrisome	Collagens	COL2A1	collagen, type II, alpha 1	2200	Homo sapiens	Kniest dysplasia	ANFH|AOM|COL11A3|MGC131516|SEDC	2200	P02458	NP_001835.3:NP_149162.2
Core matrisome	Collagens	COL2A1	collagen, type II, alpha 1	2200	Homo sapiens	Legg-Calve-Perthes disease	ANFH|AOM|COL11A3|MGC131516|SEDC	2200	P02458	NP_001835.3:NP_149162.2
Core matrisome	Collagens	COL2A1	collagen, type II, alpha 1	2200	Homo sapiens	mild spondyloepiphyseal dysplasia due to COL2A1 mutation with early-onset osteoarthritis	ANFH|AOM|COL11A3|MGC131516|SEDC	2200	P02458	NP_001835.3:NP_149162.2
Core matrisome	Collagens	COL2A1	collagen, type II, alpha 1	2200	Homo sapiens	multiple epiphyseal dysplasia, Beighton type	ANFH|AOM|COL11A3|MGC131516|SEDC	2200	P02458	NP_001835.3:NP_149162.2
Core matrisome	Collagens	COL2A1	collagen, type II, alpha 1	2200	Homo sapiens	platyspondylic dysplasia, Torrance type	ANFH|AOM|COL11A3|MGC131516|SEDC	2200	P02458	NP_001835.3:NP_149162.2
Core matrisome	Collagens	COL2A1	collagen, type II, alpha 1	2200	Homo sapiens	spondyloepimetaphyseal dysplasia, Strudwick type	ANFH|AOM|COL11A3|MGC131516|SEDC	2200	P02458	NP_001835.3:NP_149162.2
Core matrisome	Collagens	COL2A1	collagen, type II, alpha 1	2200	Homo sapiens	spondyloepiphyseal dysplasia congenita	ANFH|AOM|COL11A3|MGC131516|SEDC	2200	P02458	NP_001835.3:NP_149162.2
Core matrisome	Collagens	COL2A1	collagen, type II, alpha 1	2200	Homo sapiens	spondyloepiphyseal dysplasia, Stanescu type	ANFH|AOM|COL11A3|MGC131516|SEDC	2200	P02458	NP_001835.3:NP_149162.2
Core matrisome	Collagens	COL2A1	collagen, type II, alpha 1	2200	Homo sapiens	spondylometaphyseal dysplasia, Schmidt type	ANFH|AOM|COL11A3|MGC131516|SEDC	2200	P02458	NP_001835.3:NP_149162.2
Core matrisome	Collagens	COL2A1	collagen, type II, alpha 1	2200	Homo sapiens	spondyloperipheral dysplasia-short ulna syndrome	ANFH|AOM|COL11A3|MGC131516|SEDC	2200	P02458	NP_001835.3:NP_149162.2
Core matrisome	Collagens	COL2A1	collagen, type II, alpha 1	2200	Homo sapiens	Stickler syndrome type 1	ANFH|AOM|COL11A3|MGC131516|SEDC	2200	P02458	NP_001835.3:NP_149162.2
Core matrisome	Collagens	COL2A1	collagen, type II, alpha 1	2200	Homo sapiens	Stickler syndrome, type I, nonsyndromic ocular	ANFH|AOM|COL11A3|MGC131516|SEDC	2200	P02458	NP_001835.3:NP_149162.2
Core matrisome	Collagens	COL3A1	collagen, type III, alpha 1	2201	Homo sapiens	acrogeria	EDS4A|FLJ34534	2201	E7ENY8:H7C435:P02461	NP_000081.1
Core matrisome	Collagens	COL3A1	collagen, type III, alpha 1	2201	Homo sapiens	autosomal dominant Ehlers-Danlos syndrome, vascular type	EDS4A|FLJ34534	2201	E7ENY8:H7C435:P02461	NP_000081.1
Core matrisome	Collagens	COL3A1	collagen, type III, alpha 1	2201	Homo sapiens	Ehlers-Danlos syndrome, vascular type	EDS4A|FLJ34534	2201	E7ENY8:H7C435:P02461	NP_000081.1
Core matrisome	Collagens	COL4A1	collagen, type IV, alpha 1	2202	Homo sapiens	autosomal dominant familial hematuria-retinal arteriolar tortuosity-contractures syndrome	arresten	2202	F5H5K0:P02462	NP_001836.2
Core matrisome	Collagens	COL4A1	collagen, type IV, alpha 1	2202	Homo sapiens	COL4A1-related familial vascular leukoencephalopathy	arresten	2202	F5H5K0:P02462	NP_001836.2
Core matrisome	Collagens	COL4A1	collagen, type IV, alpha 1	2202	Homo sapiens	familial porencephaly	arresten	2202	F5H5K0:P02462	NP_001836.2
Core matrisome	Collagens	COL4A1	collagen, type IV, alpha 1	2202	Homo sapiens	familial schizencephaly	arresten	2202	F5H5K0:P02462	NP_001836.2
Core matrisome	Collagens	COL4A1	collagen, type IV, alpha 1	2202	Homo sapiens	pontine autosomal dominant microangiopathy with leukoencephalopathy	arresten	2202	F5H5K0:P02462	NP_001836.2
Core matrisome	Collagens	COL4A1	collagen, type IV, alpha 1	2202	Homo sapiens	porencephaly 1	arresten	2202	F5H5K0:P02462	NP_001836.2
Core matrisome	Collagens	COL4A1	collagen, type IV, alpha 1	2202	Homo sapiens	retinal arterial tortuosity (disease)	arresten	2202	F5H5K0:P02462	NP_001836.2
Core matrisome	Collagens	COL4A1	collagen, type IV, alpha 1	2202	Homo sapiens	Walker-Warburg syndrome	arresten	2202	F5H5K0:P02462	NP_001836.2
Core matrisome	Collagens	COL4A2	collagen, type IV, alpha 2	2203	Homo sapiens	familial porencephaly	DKFZp686I14213|FLJ22259	2203	A2A352:P08572	NP_001837.2
Core matrisome	Collagens	COL4A2	collagen, type IV, alpha 2	2203	Homo sapiens	porencephaly 2	DKFZp686I14213|FLJ22259	2203	A2A352:P08572	NP_001837.2
Core matrisome	Collagens	COL4A3	collagen, type IV, alpha 3 (Goodpasture antigen)	2204	Homo sapiens	autosomal dominant Alport syndrome	-	2204	H7BXM4:Q01955	NP_000082.2
Core matrisome	Collagens	COL4A3	collagen, type IV, alpha 3 (Goodpasture antigen)	2204	Homo sapiens	autosomal recessive Alport syndrome	-	2204	H7BXM4:Q01955	NP_000082.2
Core matrisome	Collagens	COL4A3	collagen, type IV, alpha 3 (Goodpasture antigen)	2204	Homo sapiens	hematuria, benign familial	-	2204	H7BXM4:Q01955	NP_000082.2
Core matrisome	Collagens	COL4A4	collagen, type IV, alpha 4	2206	Homo sapiens	autosomal dominant Alport syndrome	CA44	2206	J3KNM7:P53420	NP_000083.3:XP_005246338.1
Core matrisome	Collagens	COL4A4	collagen, type IV, alpha 4	2206	Homo sapiens	autosomal recessive Alport syndrome	CA44	2206	J3KNM7:P53420	NP_000083.3:XP_005246338.1
Core matrisome	Collagens	COL4A4	collagen, type IV, alpha 4	2206	Homo sapiens	hematuria, benign familial	CA44	2206	J3KNM7:P53420	NP_000083.3:XP_005246338.1
Core matrisome	Collagens	COL4A5	collagen, type IV, alpha 5	2207	Homo sapiens	X-linked Alport syndrome	ASLN|ATS|CA54|MGC167109|MGC42377	2207	H0Y998:H0Y9H0:H0Y9R8:P29400	NP_000486.1:NP_203699.1:XP_006724679.1
Core matrisome	Collagens	COL4A6	collagen, type IV, alpha 6	2208	Homo sapiens	X-linked nonsyndromic deafness	MGC88184	2208	A8MXH5:B4DZ39:F5H3Q5:F5H851:Q14031	NP_001274688.1:NP_001274689.1:NP_001274689.1:NP_001838.2:NP_378667.1
Core matrisome	Collagens	COL5A1	collagen, type V, alpha 1	2209	Homo sapiens	Ehlers-Danlos syndrome, classic type	-	2209	H7BY82:P20908	NP_000084.3
Core matrisome	Collagens	COL5A2	collagen, type V, alpha 2	2210	Homo sapiens	Ehlers-Danlos syndrome type 2	MGC105115	2210	P05997	NP_000384.2
Core matrisome	Collagens	COL5A2	collagen, type V, alpha 2	2210	Homo sapiens	Ehlers-Danlos syndrome, classic type	MGC105115	2210	P05997	NP_000384.2
Core matrisome	Collagens	COL6A1	collagen, type VI, alpha 1	2211	Homo sapiens	Bethlem myopathy	OPLL	2211	P12109	NP_001839.2
Core matrisome	Collagens	COL6A1	collagen, type VI, alpha 1	2211	Homo sapiens	Bethlem myopathy 1	OPLL	2211	P12109	NP_001839.2
Core matrisome	Collagens	COL6A1	collagen, type VI, alpha 1	2211	Homo sapiens	Ullrich congenital muscular dystrophy	OPLL	2211	P12109	NP_001839.2
Core matrisome	Collagens	COL6A1	collagen, type VI, alpha 1	2211	Homo sapiens	Ullrich congenital muscular dystrophy 1	OPLL	2211	P12109	NP_001839.2
Core matrisome	Collagens	COL6A2	collagen, type VI, alpha 2	2212	Homo sapiens	Bethlem myopathy	DKFZp586E1322|FLJ46862|PP3610	2212	C9JH44:H7C0M5:P12110	NP_001840.3:NP_478054.2:NP_478055.2
Core matrisome	Collagens	COL6A2	collagen, type VI, alpha 2	2212	Homo sapiens	Bethlem myopathy 1	DKFZp586E1322|FLJ46862|PP3610	2212	C9JH44:H7C0M5:P12110	NP_001840.3:NP_478054.2:NP_478055.2
Core matrisome	Collagens	COL6A2	collagen, type VI, alpha 2	2212	Homo sapiens	myosclerosis	DKFZp586E1322|FLJ46862|PP3610	2212	C9JH44:H7C0M5:P12110	NP_001840.3:NP_478054.2:NP_478055.2
Core matrisome	Collagens	COL6A2	collagen, type VI, alpha 2	2212	Homo sapiens	Ullrich congenital muscular dystrophy	DKFZp586E1322|FLJ46862|PP3610	2212	C9JH44:H7C0M5:P12110	NP_001840.3:NP_478054.2:NP_478055.2
Core matrisome	Collagens	COL6A2	collagen, type VI, alpha 2	2212	Homo sapiens	Ullrich congenital muscular dystrophy 1	DKFZp586E1322|FLJ46862|PP3610	2212	C9JH44:H7C0M5:P12110	NP_001840.3:NP_478054.2:NP_478055.2
Core matrisome	Collagens	COL6A3	collagen, type VI, alpha 3	2213	Homo sapiens	Bethlem myopathy	DKFZp686D23123|DKFZp686K04147|DKFZp686N0262|FLJ347	2213	C9JNG9:E7ENL6:E9PCV6:I3L392:P12111	NP_004360.2:NP_476505.3:NP_476506.3:NP_476507.3:NP_476508.2:XP_005246122.1
Core matrisome	Collagens	COL6A3	collagen, type VI, alpha 3	2213	Homo sapiens	Bethlem myopathy 1	DKFZp686D23123|DKFZp686K04147|DKFZp686N0262|FLJ347	2213	C9JNG9:E7ENL6:E9PCV6:I3L392:P12111	NP_004360.2:NP_476505.3:NP_476506.3:NP_476507.3:NP_476508.2:XP_005246122.1
Core matrisome	Collagens	COL6A3	collagen, type VI, alpha 3	2213	Homo sapiens	dystonia 27	DKFZp686D23123|DKFZp686K04147|DKFZp686N0262|FLJ347	2213	C9JNG9:E7ENL6:E9PCV6:I3L392:P12111	NP_004360.2:NP_476505.3:NP_476506.3:NP_476507.3:NP_476508.2:XP_005246122.1
Core matrisome	Collagens	COL6A3	collagen, type VI, alpha 3	2213	Homo sapiens	Ullrich congenital muscular dystrophy	DKFZp686D23123|DKFZp686K04147|DKFZp686N0262|FLJ347	2213	C9JNG9:E7ENL6:E9PCV6:I3L392:P12111	NP_004360.2:NP_476505.3:NP_476506.3:NP_476507.3:NP_476508.2:XP_005246122.1
Core matrisome	Collagens	COL6A3	collagen, type VI, alpha 3	2213	Homo sapiens	Ullrich congenital muscular dystrophy 1	DKFZp686D23123|DKFZp686K04147|DKFZp686N0262|FLJ347	2213	C9JNG9:E7ENL6:E9PCV6:I3L392:P12111	NP_004360.2:NP_476505.3:NP_476506.3:NP_476507.3:NP_476508.2:XP_005246122.1
Core matrisome	Collagens	COL7A1	collagen, type VII, alpha 1	2214	Homo sapiens	acral dystrophic epidermolysis bullosa	EBD1|EBDCT|EBR1	2214	C9JBL3:Q02388	NP_000085.1
Core matrisome	Collagens	COL7A1	collagen, type VII, alpha 1	2214	Homo sapiens	centripetalis recessive dystrophic epidermolysis bullosa	EBD1|EBDCT|EBR1	2214	C9JBL3:Q02388	NP_000085.1
Core matrisome	Collagens	COL7A1	collagen, type VII, alpha 1	2214	Homo sapiens	dystrophic epidermolysis bullosa pruriginosa	EBD1|EBDCT|EBR1	2214	C9JBL3:Q02388	NP_000085.1
Core matrisome	Collagens	COL7A1	collagen, type VII, alpha 1	2214	Homo sapiens	dystrophic epidermolysis bullosa, nails only	EBD1|EBDCT|EBR1	2214	C9JBL3:Q02388	NP_000085.1
Core matrisome	Collagens	COL7A1	collagen, type VII, alpha 1	2214	Homo sapiens	epidermolysis bullosa simplex superficialis	EBD1|EBDCT|EBR1	2214	C9JBL3:Q02388	NP_000085.1
Core matrisome	Collagens	COL7A1	collagen, type VII, alpha 1	2214	Homo sapiens	epidermolysis bullosa with congenital localized absence of skin and deformity of nails	EBD1|EBDCT|EBR1	2214	C9JBL3:Q02388	NP_000085.1
Core matrisome	Collagens	COL7A1	collagen, type VII, alpha 1	2214	Homo sapiens	generalized dominant dystrophic epidermolysis bullosa	EBD1|EBDCT|EBR1	2214	C9JBL3:Q02388	NP_000085.1
Core matrisome	Collagens	COL7A1	collagen, type VII, alpha 1	2214	Homo sapiens	nonsyndromic congenital nail disorder 8	EBD1|EBDCT|EBR1	2214	C9JBL3:Q02388	NP_000085.1
Core matrisome	Collagens	COL7A1	collagen, type VII, alpha 1	2214	Homo sapiens	pretibial dystrophic epidermolysis bullosa	EBD1|EBDCT|EBR1	2214	C9JBL3:Q02388	NP_000085.1
Core matrisome	Collagens	COL7A1	collagen, type VII, alpha 1	2214	Homo sapiens	recessive dystrophic epidermolysis bullosa	EBD1|EBDCT|EBR1	2214	C9JBL3:Q02388	NP_000085.1
Core matrisome	Collagens	COL7A1	collagen, type VII, alpha 1	2214	Homo sapiens	recessive dystrophic epidermolysis bullosa inversa	EBD1|EBDCT|EBR1	2214	C9JBL3:Q02388	NP_000085.1
Core matrisome	Collagens	COL7A1	collagen, type VII, alpha 1	2214	Homo sapiens	recessive dystrophic epidermolysis bullosa-generalized other	EBD1|EBDCT|EBR1	2214	C9JBL3:Q02388	NP_000085.1
Core matrisome	Collagens	COL7A1	collagen, type VII, alpha 1	2214	Homo sapiens	transient bullous dermolysis of the newborn	EBD1|EBDCT|EBR1	2214	C9JBL3:Q02388	NP_000085.1
Core matrisome	Collagens	COL8A2	collagen, type VIII, alpha 2	2216	Homo sapiens	corneal dystrophy, Fuchs endothelial, 1	FECD|FECD1|FLJ00201|MGC116970|MGC116972|PPCD|PPCD2	2216	E9PP49:P25067	NP_005193.1:XP_005270535.1:XP_005270536.1
Core matrisome	Collagens	COL8A2	collagen, type VIII, alpha 2	2216	Homo sapiens	Fuchs' endothelial dystrophy	FECD|FECD1|FLJ00201|MGC116970|MGC116972|PPCD|PPCD2	2216	E9PP49:P25067	NP_005193.1:XP_005270535.1:XP_005270536.1
Core matrisome	Collagens	COL8A2	collagen, type VIII, alpha 2	2216	Homo sapiens	posterior polymorphous corneal dystrophy	FECD|FECD1|FLJ00201|MGC116970|MGC116972|PPCD|PPCD2	2216	E9PP49:P25067	NP_005193.1:XP_005270535.1:XP_005270536.1
Core matrisome	Collagens	COL8A2	collagen, type VIII, alpha 2	2216	Homo sapiens	posterior polymorphous corneal dystrophy 2	FECD|FECD1|FLJ00201|MGC116970|MGC116972|PPCD|PPCD2	2216	E9PP49:P25067	NP_005193.1:XP_005270535.1:XP_005270536.1
Core matrisome	Collagens	COL9A1	collagen, type IX, alpha 1	2217	Homo sapiens	autosomal recessive Stickler syndrome	DJ149L1.1.2|EDM6|FLJ40263|MED	2217	A6NEQ6:P20849	NP_001842.3:NP_511040.2
Core matrisome	Collagens	COL9A1	collagen, type IX, alpha 1	2217	Homo sapiens	multiple epiphyseal dysplasia due to collagen 9 anomaly	DJ149L1.1.2|EDM6|FLJ40263|MED	2217	A6NEQ6:P20849	NP_001842.3:NP_511040.2
Core matrisome	Collagens	COL9A1	collagen, type IX, alpha 1	2217	Homo sapiens	Stickler syndrome, type 4	DJ149L1.1.2|EDM6|FLJ40263|MED	2217	A6NEQ6:P20849	NP_001842.3:NP_511040.2
Core matrisome	Collagens	COL9A2	collagen, type IX, alpha 2	2218	Homo sapiens	autosomal recessive Stickler syndrome	DJ39G22.4|EDM2|MED	2218	B1AKJ1:B1AKJ3:H0Y409:Q14055	NP_001843.1:XP_006710428.1
Core matrisome	Collagens	COL9A2	collagen, type IX, alpha 2	2218	Homo sapiens	epiphyseal dysplasia, multiple, 2	DJ39G22.4|EDM2|MED	2218	B1AKJ1:B1AKJ3:H0Y409:Q14055	NP_001843.1:XP_006710428.1
Core matrisome	Collagens	COL9A2	collagen, type IX, alpha 2	2218	Homo sapiens	multiple epiphyseal dysplasia due to collagen 9 anomaly	DJ39G22.4|EDM2|MED	2218	B1AKJ1:B1AKJ3:H0Y409:Q14055	NP_001843.1:XP_006710428.1
Core matrisome	Collagens	COL9A3	collagen, type IX, alpha 3	2219	Homo sapiens	autosomal recessive Stickler syndrome	DJ885L7.4.1|EDM3|FLJ90759|IDD|MED	2219	Q14050:Q4VXW1	NP_001844.3
Core matrisome	Collagens	COL9A3	collagen, type IX, alpha 3	2219	Homo sapiens	epiphyseal dysplasia, multiple, 3	DJ885L7.4.1|EDM3|FLJ90759|IDD|MED	2219	Q14050:Q4VXW1	NP_001844.3
Core matrisome	Collagens	COL9A3	collagen, type IX, alpha 3	2219	Homo sapiens	multiple epiphyseal dysplasia due to collagen 9 anomaly	DJ885L7.4.1|EDM3|FLJ90759|IDD|MED	2219	Q14050:Q4VXW1	NP_001844.3
Core matrisome	ECM Glycoproteins	AEBP1	AE binding protein 1	NA	Homo sapiens	ehlers-danlos syndrome, classic-like, 2	ACLP	NA	NA	NA
Core matrisome	ECM Glycoproteins	AGRN	agrin	329	Homo sapiens	congenital myasthenic syndrome 8	FLJ45064	329	H0Y5U1:O00468	NP_940978.2:XP_005244806.1:XP_006710696.1
Core matrisome	ECM Glycoproteins	AGRN	agrin	329	Homo sapiens	postsynaptic congenital myasthenic syndrome	FLJ45064	329	H0Y5U1:O00468	NP_940978.2:XP_005244806.1:XP_006710696.1
Core matrisome	ECM Glycoproteins	AGRN	agrin	329	Homo sapiens	presynaptic congenital myasthenic syndrome	FLJ45064	329	H0Y5U1:O00468	NP_940978.2:XP_005244806.1:XP_006710696.1
Core matrisome	ECM Glycoproteins	AMBN	ameloblastin (enamel matrix protein)	452	Homo sapiens	amelogenesis imperfecta type 1	-	452	Q9NP70	NP_057603.1
Core matrisome	ECM Glycoproteins	AMBN	ameloblastin (enamel matrix protein)	452	Homo sapiens	amelogenesis imperfecta type 1F	-	452	Q9NP70	NP_057603.1
Core matrisome	ECM Glycoproteins	AMELX	amelogenin (amelogenesis imperfecta 1, X-linked)	461	Homo sapiens	amelogenesis imperfecta type 1E	AIH1|ALGN|AMG|AMGL|AMGX	461	Q99217	NP_001133.1:NP_872621.1:NP_872622.1
Core matrisome	ECM Glycoproteins	AMELX	amelogenin (amelogenesis imperfecta 1, X-linked)	461	Homo sapiens	amelogenesis imperfecta type 2	AIH1|ALGN|AMG|AMGL|AMGX	461	Q99217	NP_001133.1:NP_872621.1:NP_872622.1
Core matrisome	ECM Glycoproteins	BMPER	BMP binding endothelial regulator	24154	Homo sapiens	diaphanospondylodysostosis	CRIM3|CV-2|CV2	24154	C9JY72:F8WDG9:G5E9K4:Q8N8U9	NP_597725.1
Core matrisome	ECM Glycoproteins	BMPER	BMP binding endothelial regulator	24154	Homo sapiens	ischio-vertebral syndrome	CRIM3|CV-2|CV2	24154	C9JY72:F8WDG9:G5E9K4:Q8N8U9	NP_597725.1
Core matrisome	ECM Glycoproteins	COCH	coagulation factor C homolog, cochlin (Limulus polyphemus)	2180	Homo sapiens	autosomal dominant nonsyndromic deafness	COCH-5B2|COCH5B2|DFNA9	2180	E7EN67:G3V4C4:G3V5G6:G3V5V4:G3V5X3:H0YJJ0:H0YJW4:O43405:Q96IU6	NP_001128530.1:NP_004077.1:XP_006720136.1
Core matrisome	ECM Glycoproteins	COCH	coagulation factor C homolog, cochlin (Limulus polyphemus)	2180	Homo sapiens	autosomal dominant nonsyndromic deafness 9	COCH-5B2|COCH5B2|DFNA9	2180	E7EN67:G3V4C4:G3V5G6:G3V5V4:G3V5X3:H0YJJ0:H0YJW4:O43405:Q96IU6	NP_001128530.1:NP_004077.1:XP_006720136.1
Core matrisome	ECM Glycoproteins	COLQ	collagen-like tail subunit (single strand of homotrimer) of asymmetric acetylcholinesterase	2226	Homo sapiens	congenital myasthenic syndrome 5	EAD|FLJ55041	2226	C9JBB2:F8WA67:Q9Y215:S4R408	NP_005668.2:NP_536799.1:NP_536800.2
Core matrisome	ECM Glycoproteins	COLQ	collagen-like tail subunit (single strand of homotrimer) of asymmetric acetylcholinesterase	2226	Homo sapiens	synaptic congenital myasthenic syndrome	EAD|FLJ55041	2226	C9JBB2:F8WA67:Q9Y215:S4R408	NP_005668.2:NP_536799.1:NP_536800.2
Core matrisome	ECM Glycoproteins	COMP	cartilage oligomeric matrix protein	2227	Homo sapiens	multiple epiphyseal dysplasia type 1	EDM1|EPD1|MED|MGC131819|MGC149768|PSACH|THBS5	2227	B4DKJ3:G3XAP6:P49747	NP_000086.2
Core matrisome	ECM Glycoproteins	COMP	cartilage oligomeric matrix protein	2227	Homo sapiens	pseudoachondroplasia	EDM1|EPD1|MED|MGC131819|MGC149768|PSACH|THBS5	2227	B4DKJ3:G3XAP6:P49747	NP_000086.2
Core matrisome	ECM Glycoproteins	CRELD1	cysteine-rich with EGF-like domains 1	14630	Homo sapiens	atrioventricular septal defect, susceptibility to, 2	AVSD2|CIRRIN|DKFZp566D213	14630	F8WBY3:H7C2L3:Q96HD1	NP_001026887.1:NP_001070883.1:NP_056328.2:XP_006713391.1
Core matrisome	ECM Glycoproteins	CRELD1	cysteine-rich with EGF-like domains 1	14630	Homo sapiens	partial atrioventricular canal	AVSD2|CIRRIN|DKFZp566D213	14630	F8WBY3:H7C2L3:Q96HD1	NP_001026887.1:NP_001070883.1:NP_056328.2:XP_006713391.1
Core matrisome	ECM Glycoproteins	CRIM1	cysteine rich transmembrane BMP regulator 1 (chordin-like)	2359	Homo sapiens	colobomatous macrophthalmia-microcornea syndrome	MGC138194|S52	2359	H7C1Z0:H7C2T6:H7C458:Q9NZV1	NP_057525.1
Core matrisome	ECM Glycoproteins	CTHRC1	collagen triple helix repeat containing 1	18831	Homo sapiens	Barrett esophagus	-	18831	E5RK99:E7EVQ5:Q96CG8	NP_001243028.1:NP_612464.1
Core matrisome	ECM Glycoproteins	DMP1	dentin matrix acidic phosphoprotein 1	2932	Homo sapiens	autosomal recessive hypophosphatemic rickets	ARHP|ARHR|DMP-1	2932	Q13316	NP_001073380.1:NP_004398.1
Core matrisome	ECM Glycoproteins	DMP1	dentin matrix acidic phosphoprotein 1	2932	Homo sapiens	hypophosphatemic rickets, autosomal recessive, 1	ARHP|ARHR|DMP-1	2932	Q13316	NP_001073380.1:NP_004398.1
Core matrisome	ECM Glycoproteins	DSPP	dentin sialophosphoprotein	3054	Homo sapiens	deafness, autosomal dominant 39, with dentinogenesis imperfecta 1	DFNA39|DGI1|DMP3|DPP|DSP|DTDP2	3054	Q9NZW4	NP_055023.2
Core matrisome	ECM Glycoproteins	DSPP	dentin sialophosphoprotein	3054	Homo sapiens	dentin dysplasia type I	DFNA39|DGI1|DMP3|DPP|DSP|DTDP2	3054	Q9NZW4	NP_055023.2
Core matrisome	ECM Glycoproteins	DSPP	dentin sialophosphoprotein	3054	Homo sapiens	dentin dysplasia type II	DFNA39|DGI1|DMP3|DPP|DSP|DTDP2	3054	Q9NZW4	NP_055023.2
Core matrisome	ECM Glycoproteins	DSPP	dentin sialophosphoprotein	3054	Homo sapiens	dentinogenesis imperfecta type 2	DFNA39|DGI1|DMP3|DPP|DSP|DTDP2	3054	Q9NZW4	NP_055023.2
Core matrisome	ECM Glycoproteins	DSPP	dentin sialophosphoprotein	3054	Homo sapiens	dentinogenesis imperfecta type 3	DFNA39|DGI1|DMP3|DPP|DSP|DTDP2	3054	Q9NZW4	NP_055023.2
Core matrisome	ECM Glycoproteins	ECM1	extracellular matrix protein 1	3153	Homo sapiens	lipoid proteinosis	-	3153	Q16610	NP_001189787.1:NP_004416.2:NP_073155.2
Core matrisome	ECM Glycoproteins	EFEMP1	EGF-containing fibulin-like extracellular matrix protein 1	3218	Homo sapiens	Doyne honeycomb retinal dystrophy	DHRD|DRAD|FBLN3|FBNL|FLJ35535|MGC111353|MLVT|MTLV|	3218	C9J4H7:C9J4J8:C9J8S9:C9JPZ9:C9JQX7:C9JUM4:Q12805:Q580Q6	NP_001034437.1:NP_001034438.1
Core matrisome	ECM Glycoproteins	EFEMP2	EGF-containing fibulin-like extracellular matrix protein 2	3219	Homo sapiens	autosomal recessive cutis laxa type 1	FBLN4|MBP1|UPH1	3219	E9PI47:E9PKA3:E9PNB8:E9PRQ8:E9PRU1:E9PSC1:H0YCB5:H0YCR9:H0YET5:H0YEU0:O95967	NP_058634.4
Core matrisome	ECM Glycoproteins	EFEMP2	EGF-containing fibulin-like extracellular matrix protein 2	3219	Homo sapiens	cutis laxa, autosomal recessive, type 1B	FBLN4|MBP1|UPH1	3219	E9PI47:E9PKA3:E9PNB8:E9PRQ8:E9PRU1:E9PSC1:H0YCB5:H0YCR9:H0YET5:H0YEU0:O95967	NP_058634.4
Core matrisome	ECM Glycoproteins	EFEMP2	EGF-containing fibulin-like extracellular matrix protein 2	3219	Homo sapiens	lethal arteriopathy syndrome due to fibulin-4 deficiency	FBLN4|MBP1|UPH1	3219	E9PI47:E9PKA3:E9PNB8:E9PRQ8:E9PRU1:E9PSC1:H0YCB5:H0YCR9:H0YET5:H0YEU0:O95967	NP_058634.4
Core matrisome	ECM Glycoproteins	ELN	elastin	3327	Homo sapiens	autosomal dominant cutis laxa	FLJ38671|FLJ43523|SVAS|WBS|WS	3327	E7EN51:E7EN65:E7ENM0:E7ENW7:E7EP82:E7EQH8:E7ETP7:E7EWS8:E9PGX4:F8WAH6:G3V0G6:G5E950:H7C3K0:P15502	NP_000492.2:NP_001075221.1:NP_001075222.1:NP_001075223.1:NP_001075224.1:NP_001265844.1:NP_001265845.1:NP_001265841.1:NP_001265842.1:NP_001265843.1:NP_001265846.1
Core matrisome	ECM Glycoproteins	ELN	elastin	3327	Homo sapiens	cutis laxa, autosomal dominant 1	FLJ38671|FLJ43523|SVAS|WBS|WS	3327	E7EN51:E7EN65:E7ENM0:E7ENW7:E7EP82:E7EQH8:E7ETP7:E7EWS8:E9PGX4:F8WAH6:G3V0G6:G5E950:H7C3K0:P15502	NP_000492.2:NP_001075221.1:NP_001075222.1:NP_001075223.1:NP_001075224.1:NP_001265844.1:NP_001265845.1:NP_001265841.1:NP_001265842.1:NP_001265843.1:NP_001265846.1
Core matrisome	ECM Glycoproteins	ELN	elastin	3327	Homo sapiens	supravalvular aortic stenosis (disease)	FLJ38671|FLJ43523|SVAS|WBS|WS	3327	E7EN51:E7EN65:E7ENM0:E7ENW7:E7EP82:E7EQH8:E7ETP7:E7EWS8:E9PGX4:F8WAH6:G3V0G6:G5E950:H7C3K0:P15502	NP_000492.2:NP_001075221.1:NP_001075222.1:NP_001075223.1:NP_001075224.1:NP_001265844.1:NP_001265845.1:NP_001265841.1:NP_001265842.1:NP_001265843.1:NP_001265846.1
Core matrisome	ECM Glycoproteins	EMILIN1	elastin microfibril interfacer 1	19880	Homo sapiens	EMILIN-1-related connective tissue disease	DKFZp586M121|EMI|EMILIN|gp115	19880	H0Y7A0:Q9Y6C2	NP_008977.1
Core matrisome	ECM Glycoproteins	EYS	eyes shut homolog (Drosophila)	21555	Homo sapiens	retinitis pigmentosa	C6orf178|C6orf179|C6orf180|EGFL10|EGFL11|KIAA0663|	21555	F8WDD3:H0Y3Q4:Q5T1H1	NP_001136272.1:NP_001136273.1:NP_938024.1
Core matrisome	ECM Glycoproteins	EYS	eyes shut homolog (Drosophila)	21555	Homo sapiens	retinitis pigmentosa 25	C6orf178|C6orf179|C6orf180|EGFL10|EGFL11|KIAA0663|	21555	F8WDD3:H0Y3Q4:Q5T1H1	NP_001136272.1:NP_001136273.1:NP_938024.1
Core matrisome	ECM Glycoproteins	FBLN1	fibulin 1	3600	Homo sapiens	FBLN1-related developmental delay-central nervous system anomaly-syndactyly syndrome	FBLN|FIBL1	3600	B1AHL2:B1AHM4:B1AHM5:B1AHM6:B1AHM7:B1AHM8:B1AHM9:B1AHN3:F8W7M9:H7C1M6:P23142	NP_001987.2:NP_006476.2:NP_006477.2:NP_006478.2
Core matrisome	ECM Glycoproteins	FBLN1	fibulin 1	3600	Homo sapiens	synpolydactyly type 2	FBLN|FIBL1	3600	B1AHL2:B1AHM4:B1AHM5:B1AHM6:B1AHM7:B1AHM8:B1AHM9:B1AHN3:F8W7M9:H7C1M6:P23142	NP_001987.2:NP_006476.2:NP_006477.2:NP_006478.2
Core matrisome	ECM Glycoproteins	FBLN5	fibulin 5	3602	Homo sapiens	autosomal dominant cutis laxa	ARMD3|DANCE|EVEC|FIBL-5|FLJ90059|UP50	3602	G3V2P8:G3V329:G3V3Y2:G3V4U0:G3XA98:H0YJ31:Q9UBX5	NP_006320.2
Core matrisome	ECM Glycoproteins	FBLN5	fibulin 5	3602	Homo sapiens	autosomal recessive cutis laxa type 1	ARMD3|DANCE|EVEC|FIBL-5|FLJ90059|UP50	3602	G3V2P8:G3V329:G3V3Y2:G3V4U0:G3XA98:H0YJ31:Q9UBX5	NP_006320.2
Core matrisome	ECM Glycoproteins	FBLN5	fibulin 5	3602	Homo sapiens	cutis laxa, autosomal recessive, type 1A	ARMD3|DANCE|EVEC|FIBL-5|FLJ90059|UP50	3602	G3V2P8:G3V329:G3V3Y2:G3V4U0:G3XA98:H0YJ31:Q9UBX5	NP_006320.2
Core matrisome	ECM Glycoproteins	FBLN5	fibulin 5	3602	Homo sapiens	hereditary sensorimotor neuropathy with hyperelastic skin	ARMD3|DANCE|EVEC|FIBL-5|FLJ90059|UP50	3602	G3V2P8:G3V329:G3V3Y2:G3V4U0:G3XA98:H0YJ31:Q9UBX5	NP_006320.2
Core matrisome	ECM Glycoproteins	FBLN5	fibulin 5	3602	Homo sapiens	macular degeneration, age-related, 3	ARMD3|DANCE|EVEC|FIBL-5|FLJ90059|UP50	3602	G3V2P8:G3V329:G3V3Y2:G3V4U0:G3XA98:H0YJ31:Q9UBX5	NP_006320.2
Core matrisome	ECM Glycoproteins	FBN1	fibrillin 1	3603	Homo sapiens	acromicric dysplasia	FBN|MASS|MFS1|OCTD|SGS|WMS	3603	F6U495:H0YN80:H0YND0:P35555	NP_000129.3
Core matrisome	ECM Glycoproteins	FBN1	fibrillin 1	3603	Homo sapiens	ectopia lentis 1, isolated, autosomal dominant	FBN|MASS|MFS1|OCTD|SGS|WMS	3603	F6U495:H0YN80:H0YND0:P35555	NP_000129.3
Core matrisome	ECM Glycoproteins	FBN1	fibrillin 1	3603	Homo sapiens	familial thoracic aortic aneurysm and aortic dissection	FBN|MASS|MFS1|OCTD|SGS|WMS	3603	F6U495:H0YN80:H0YND0:P35555	NP_000129.3
Core matrisome	ECM Glycoproteins	FBN1	fibrillin 1	3603	Homo sapiens	geleophysic dysplasia	FBN|MASS|MFS1|OCTD|SGS|WMS	3603	F6U495:H0YN80:H0YND0:P35555	NP_000129.3
Core matrisome	ECM Glycoproteins	FBN1	fibrillin 1	3603	Homo sapiens	Geleophysic dysplasia 2	FBN|MASS|MFS1|OCTD|SGS|WMS	3603	F6U495:H0YN80:H0YND0:P35555	NP_000129.3
Core matrisome	ECM Glycoproteins	FBN1	fibrillin 1	3603	Homo sapiens	glaucoma-ectopia-microspherophakia-stiff joints-short stature syndrome	FBN|MASS|MFS1|OCTD|SGS|WMS	3603	F6U495:H0YN80:H0YND0:P35555	NP_000129.3
Core matrisome	ECM Glycoproteins	FBN1	fibrillin 1	3603	Homo sapiens	isolated ectopia lentis	FBN|MASS|MFS1|OCTD|SGS|WMS	3603	F6U495:H0YN80:H0YND0:P35555	NP_000129.3
Core matrisome	ECM Glycoproteins	FBN1	fibrillin 1	3603	Homo sapiens	Marfan syndrome	FBN|MASS|MFS1|OCTD|SGS|WMS	3603	F6U495:H0YN80:H0YND0:P35555	NP_000129.3
Core matrisome	ECM Glycoproteins	FBN1	fibrillin 1	3603	Homo sapiens	MASS syndrome	FBN|MASS|MFS1|OCTD|SGS|WMS	3603	F6U495:H0YN80:H0YND0:P35555	NP_000129.3
Core matrisome	ECM Glycoproteins	FBN1	fibrillin 1	3603	Homo sapiens	neonatal Marfan syndrome	FBN|MASS|MFS1|OCTD|SGS|WMS	3603	F6U495:H0YN80:H0YND0:P35555	NP_000129.3
Core matrisome	ECM Glycoproteins	FBN1	fibrillin 1	3603	Homo sapiens	progeroid and marfanoid aspect-lipodystrophy syndrome	FBN|MASS|MFS1|OCTD|SGS|WMS	3603	F6U495:H0YN80:H0YND0:P35555	NP_000129.3
Core matrisome	ECM Glycoproteins	FBN1	fibrillin 1	3603	Homo sapiens	stiff skin syndrome	FBN|MASS|MFS1|OCTD|SGS|WMS	3603	F6U495:H0YN80:H0YND0:P35555	NP_000129.3
Core matrisome	ECM Glycoproteins	FBN1	fibrillin 1	3603	Homo sapiens	Weill-Marchesani syndrome	FBN|MASS|MFS1|OCTD|SGS|WMS	3603	F6U495:H0YN80:H0YND0:P35555	NP_000129.3
Core matrisome	ECM Glycoproteins	FBN2	fibrillin 2	3604	Homo sapiens	congenital contractural arachnodactyly	CCA|DA9	3604	D6REJ2:D6RJI3:E9PHW4:P35556	NP_001990.2
Core matrisome	ECM Glycoproteins	FBN2	fibrillin 2	3604	Homo sapiens	macular degeneration, early-onset	CCA|DA9	3604	D6REJ2:D6RJI3:E9PHW4:P35556	NP_001990.2
Core matrisome	ECM Glycoproteins	FGA	fibrinogen alpha chain	3661	Homo sapiens	AFib amyloidosis	Fib2|MGC119422|MGC119423|MGC119425	3661	P02671	NP_000499.1:NP_068657.1
Core matrisome	ECM Glycoproteins	FGA	fibrinogen alpha chain	3661	Homo sapiens	congenital afibrinogenemia	Fib2|MGC119422|MGC119423|MGC119425	3661	P02671	NP_000499.1:NP_068657.1
Core matrisome	ECM Glycoproteins	FGA	fibrinogen alpha chain	3661	Homo sapiens	familial dysfibrinogenemia	Fib2|MGC119422|MGC119423|MGC119425	3661	P02671	NP_000499.1:NP_068657.1
Core matrisome	ECM Glycoproteins	FGA	fibrinogen alpha chain	3661	Homo sapiens	familial hypodysfibrinogenemia	Fib2|MGC119422|MGC119423|MGC119425	3661	P02671	NP_000499.1:NP_068657.1
Core matrisome	ECM Glycoproteins	FGA	fibrinogen alpha chain	3661	Homo sapiens	familial hypofibrinogenemia	Fib2|MGC119422|MGC119423|MGC119425	3661	P02671	NP_000499.1:NP_068657.1
Core matrisome	ECM Glycoproteins	FGA	fibrinogen alpha chain	3661	Homo sapiens	familial visceral amyloidosis	Fib2|MGC119422|MGC119423|MGC119425	3661	P02671	NP_000499.1:NP_068657.1
Core matrisome	ECM Glycoproteins	FGB	fibrinogen beta chain	3662	Homo sapiens	congenital afibrinogenemia	MGC104327|MGC120405	3662	D6REL8:F8W6P4:P02675	NP_001171670.1:NP_005132.2
Core matrisome	ECM Glycoproteins	FGB	fibrinogen beta chain	3662	Homo sapiens	familial dysfibrinogenemia	MGC104327|MGC120405	3662	D6REL8:F8W6P4:P02675	NP_001171670.1:NP_005132.2
Core matrisome	ECM Glycoproteins	FGB	fibrinogen beta chain	3662	Homo sapiens	familial hypodysfibrinogenemia	MGC104327|MGC120405	3662	D6REL8:F8W6P4:P02675	NP_001171670.1:NP_005132.2
Core matrisome	ECM Glycoproteins	FGB	fibrinogen beta chain	3662	Homo sapiens	familial hypofibrinogenemia	MGC104327|MGC120405	3662	D6REL8:F8W6P4:P02675	NP_001171670.1:NP_005132.2
Core matrisome	ECM Glycoproteins	FGG	fibrinogen gamma chain	3694	Homo sapiens	congenital afibrinogenemia	-	3694	C9JC84:C9JEU5:C9JPQ9:C9JU00:P02679	NP_000500.2:NP_068656.2
Core matrisome	ECM Glycoproteins	FGG	fibrinogen gamma chain	3694	Homo sapiens	familial dysfibrinogenemia	-	3694	C9JC84:C9JEU5:C9JPQ9:C9JU00:P02679	NP_000500.2:NP_068656.2
Core matrisome	ECM Glycoproteins	FGG	fibrinogen gamma chain	3694	Homo sapiens	familial hypodysfibrinogenemia	-	3694	C9JC84:C9JEU5:C9JPQ9:C9JU00:P02679	NP_000500.2:NP_068656.2
Core matrisome	ECM Glycoproteins	FGG	fibrinogen gamma chain	3694	Homo sapiens	familial hypofibrinogenemia	-	3694	C9JC84:C9JEU5:C9JPQ9:C9JU00:P02679	NP_000500.2:NP_068656.2
Core matrisome	ECM Glycoproteins	FRAS1	Fraser syndrome 1	19185	Homo sapiens	Fraser syndrome	DKFZp686I05113|DKFZp686P08111|FLJ14927|FLJ22031|KI	19185	D6RCP6:H0Y8V2:H0Y930:H0Y9A6:H0Y9C9:Q86XX4	NP_001159605.1:NP_079350.5
Core matrisome	ECM Glycoproteins	FRAS1	Fraser syndrome 1	19185	Homo sapiens	Fraser syndrome 1	DKFZp686I05113|DKFZp686P08111|FLJ14927|FLJ22031|KI	19185	D6RCP6:H0Y8V2:H0Y930:H0Y9A6:H0Y9C9:Q86XX4	NP_001159605.1:NP_079350.5
Core matrisome	ECM Glycoproteins	FRAS1	Fraser syndrome 1	19185	Homo sapiens	renal agenesis, unilateral	DKFZp686I05113|DKFZp686P08111|FLJ14927|FLJ22031|KI	19185	D6RCP6:H0Y8V2:H0Y930:H0Y9A6:H0Y9C9:Q86XX4	NP_001159605.1:NP_079350.5
Core matrisome	ECM Glycoproteins	GLDN	gliomedin	29514	Homo sapiens	lethal congenital contracture syndrome 11	CLOM|COLM|CRG-L2|CRGL2|FLJ23917|UNC-112	29514	H0YM22:Q6ZMI3	NP_861454.2:XP_006720545.1:XP_006720546.1
Core matrisome	ECM Glycoproteins	IGFALS	insulin-like growth factor binding protein, acid labile subunit	5468	Homo sapiens	short stature due to primary acid-labile subunit deficiency	ALS	5468	H3BSX8:P35858	NP_001139478.1:NP_004961.1
Core matrisome	ECM Glycoproteins	IGFBP7	insulin-like growth factor binding protein 7	5476	Homo sapiens	familial retinal arterial macroaneurysm	FSTL2|IGFBP-7|IGFBP-7v|IGFBPRP1|MAC25|PSF	5476	Q16270	NP_001240764.1:NP_001544.1
Core matrisome	ECM Glycoproteins	LAMA1	laminin, alpha 1	6481	Homo sapiens	ataxia - intellectual disability - oculomotor apraxia - cerebellar cysts syndrome	LAMA	6481	P25391	NP_005550.2
Core matrisome	ECM Glycoproteins	LAMA2	laminin, alpha 2	6482	Homo sapiens	congenital merosin-deficient muscular dystrophy 1A	LAMM	6482	P24043	NP_000417.2:NP_001073291.1
Core matrisome	ECM Glycoproteins	LAMA2	laminin, alpha 2	6482	Homo sapiens	muscular dystrophy, limb-girdle, autosomal recessive 23	LAMM	6482	P24043	NP_000417.2:NP_001073291.1
Core matrisome	ECM Glycoproteins	LAMA3	laminin, alpha 3	6483	Homo sapiens	generalized junctional epidermolysis bullosa non-Herlitz type	BM600|E170|LAMNA|LOCS|lama3a	6483	K7EIP4:K7EMU9:K7EPP3:K7EQ42:K7ERM0:Q16787	NP_000218.2:NP_001121189.1:NP_001121190.1:NP_937762.1
Core matrisome	ECM Glycoproteins	LAMA3	laminin, alpha 3	6483	Homo sapiens	junctional epidermolysis bullosa Herlitz type	BM600|E170|LAMNA|LOCS|lama3a	6483	K7EIP4:K7EMU9:K7EPP3:K7EQ42:K7ERM0:Q16787	NP_000218.2:NP_001121189.1:NP_001121190.1:NP_937762.1
Core matrisome	ECM Glycoproteins	LAMA3	laminin, alpha 3	6483	Homo sapiens	junctional epidermolysis bullosa, non-Herlitz type	BM600|E170|LAMNA|LOCS|lama3a	6483	K7EIP4:K7EMU9:K7EPP3:K7EQ42:K7ERM0:Q16787	NP_000218.2:NP_001121189.1:NP_001121190.1:NP_937762.1
Core matrisome	ECM Glycoproteins	LAMA3	laminin, alpha 3	6483	Homo sapiens	laryngo-onycho-cutaneous syndrome	BM600|E170|LAMNA|LOCS|lama3a	6483	K7EIP4:K7EMU9:K7EPP3:K7EQ42:K7ERM0:Q16787	NP_000218.2:NP_001121189.1:NP_001121190.1:NP_937762.1
Core matrisome	ECM Glycoproteins	LAMA4	laminin, alpha 4	6484	Homo sapiens	dilated cardiomyopathy 1JJ	DKFZp686D23145|LAMA3|LAMA4*-1	6484	E5RFD7:E5RFQ2:E5RHF3:E5RK79:H0Y351:H0YAP9:H0YAQ5:Q16363:Q6LET9	NP_001098676.2:NP_001098677.2:NP_001098678.1:NP_001098679.1:NP_002281.3
Core matrisome	ECM Glycoproteins	LAMA4	laminin, alpha 4	6484	Homo sapiens	familial isolated dilated cardiomyopathy	DKFZp686D23145|LAMA3|LAMA4*-1	6484	E5RFD7:E5RFQ2:E5RHF3:E5RK79:H0Y351:H0YAP9:H0YAQ5:Q16363:Q6LET9	NP_001098676.2:NP_001098677.2:NP_001098678.1:NP_001098679.1:NP_002281.3
Core matrisome	ECM Glycoproteins	LAMB1	laminin, beta 1	6486	Homo sapiens	cobblestone lissencephaly without muscular or ocular involvement	CLM|MGC142015	6486	C9J296:E7EPA6:E9PCS6:G3XAI2:P07942	NP_002282.2
Core matrisome	ECM Glycoproteins	LAMB2	laminin, beta 2 (laminin S)	6487	Homo sapiens	LAMB2-related infantile-onset nephrotic syndrome	LAMS	6487	F5H520:P55268	NP_002283.3:XP_005265184.1
Core matrisome	ECM Glycoproteins	LAMB2	laminin, beta 2 (laminin S)	6487	Homo sapiens	Pierson syndrome	LAMS	6487	F5H520:P55268	NP_002283.3:XP_005265184.1
Core matrisome	ECM Glycoproteins	LAMB2	laminin, beta 2 (laminin S)	6487	Homo sapiens	synaptic congenital myasthenic syndrome	LAMS	6487	F5H520:P55268	NP_002283.3:XP_005265184.1
Core matrisome	ECM Glycoproteins	LAMB3	laminin, beta 3	6490	Homo sapiens	amelogenesis imperfecta type 1	BM600-125KDA|FLJ99565|LAM5|LAMNB1	6490	Q13751:Q5THA1:X1WI29	NP_000219.2:NP_001017402.1:NP_001121113.1:XP_005273181.1
Core matrisome	ECM Glycoproteins	LAMB3	laminin, beta 3	6490	Homo sapiens	amelogenesis imperfecta type 1A	BM600-125KDA|FLJ99565|LAM5|LAMNB1	6490	Q13751:Q5THA1:X1WI29	NP_000219.2:NP_001017402.1:NP_001121113.1:XP_005273181.1
Core matrisome	ECM Glycoproteins	LAMB3	laminin, beta 3	6490	Homo sapiens	generalized junctional epidermolysis bullosa non-Herlitz type	BM600-125KDA|FLJ99565|LAM5|LAMNB1	6490	Q13751:Q5THA1:X1WI29	NP_000219.2:NP_001017402.1:NP_001121113.1:XP_005273181.1
Core matrisome	ECM Glycoproteins	LAMB3	laminin, beta 3	6490	Homo sapiens	junctional epidermolysis bullosa Herlitz type	BM600-125KDA|FLJ99565|LAM5|LAMNB1	6490	Q13751:Q5THA1:X1WI29	NP_000219.2:NP_001017402.1:NP_001121113.1:XP_005273181.1
Core matrisome	ECM Glycoproteins	LAMB3	laminin, beta 3	6490	Homo sapiens	junctional epidermolysis bullosa, non-Herlitz type	BM600-125KDA|FLJ99565|LAM5|LAMNB1	6490	Q13751:Q5THA1:X1WI29	NP_000219.2:NP_001017402.1:NP_001121113.1:XP_005273181.1
Core matrisome	ECM Glycoproteins	LAMC2	laminin, gamma 2	6493	Homo sapiens	generalized junctional epidermolysis bullosa non-Herlitz type	B2T|BM600|CSF|EBR2|EBR2A|LAMB2T|LAMNB2|MGC138491|M	6493	Q13753	NP_005553.2:NP_061486.2
Core matrisome	ECM Glycoproteins	LAMC2	laminin, gamma 2	6493	Homo sapiens	junctional epidermolysis bullosa Herlitz type	B2T|BM600|CSF|EBR2|EBR2A|LAMB2T|LAMNB2|MGC138491|M	6493	Q13753	NP_005553.2:NP_061486.2
Core matrisome	ECM Glycoproteins	LAMC2	laminin, gamma 2	6493	Homo sapiens	junctional epidermolysis bullosa, non-Herlitz type	B2T|BM600|CSF|EBR2|EBR2A|LAMB2T|LAMNB2|MGC138491|M	6493	Q13753	NP_005553.2:NP_061486.2
Core matrisome	ECM Glycoproteins	LAMC3	laminin, gamma 3	6494	Homo sapiens	occipital pachygyria and polymicrogyria	DKFZp434E202	6494	H7BY04:Q5JTC4:Q9Y6N6	NP_006050.3
Core matrisome	ECM Glycoproteins	LGI1	leucine-rich, glioma inactivated 1	6572	Homo sapiens	familial temporal lobe epilepsy 1	EPITEMPIN|EPT|ETL1|IB1099	6572	O95970	NP_005088.1:XP_005270329.1
Core matrisome	ECM Glycoproteins	LGI4	leucine-rich repeat LGI family, member 4	18712	Homo sapiens	arthrogryposis multiplex congenita, neurogenic, with myelin defect	LGIL3	18712	A8MVC2:K7ENQ0:Q8N135	NP_644813.1
Core matrisome	ECM Glycoproteins	LGI4	leucine-rich repeat LGI family, member 4	18712	Homo sapiens	hypomyelination neuropathy-arthrogryposis syndrome	LGIL3	18712	A8MVC2:K7ENQ0:Q8N135	NP_644813.1
Core matrisome	ECM Glycoproteins	LTBP2	latent transforming growth factor beta binding protein 2	6715	Homo sapiens	congenital glaucoma	C14orf141|GLC3D|LTBP3|MSTP031	6715	G3V254:G3V3X5:G3V511:H0YJ20:Q14767	NP_000419.1
Core matrisome	ECM Glycoproteins	LTBP2	latent transforming growth factor beta binding protein 2	6715	Homo sapiens	glaucoma 3, primary congenital, d	C14orf141|GLC3D|LTBP3|MSTP031	6715	G3V254:G3V3X5:G3V511:H0YJ20:Q14767	NP_000419.1
Core matrisome	ECM Glycoproteins	LTBP2	latent transforming growth factor beta binding protein 2	6715	Homo sapiens	glaucoma secondary to spherophakia/ectopia lentis and megalocornea	C14orf141|GLC3D|LTBP3|MSTP031	6715	G3V254:G3V3X5:G3V511:H0YJ20:Q14767	NP_000419.1
Core matrisome	ECM Glycoproteins	LTBP2	latent transforming growth factor beta binding protein 2	6715	Homo sapiens	microspherophakia and/or megalocornea, with ectopia lentis and with or without secondary glaucoma	C14orf141|GLC3D|LTBP3|MSTP031	6715	G3V254:G3V3X5:G3V511:H0YJ20:Q14767	NP_000419.1
Core matrisome	ECM Glycoproteins	LTBP2	latent transforming growth factor beta binding protein 2	6715	Homo sapiens	Weill-Marchesani syndrome	C14orf141|GLC3D|LTBP3|MSTP031	6715	G3V254:G3V3X5:G3V511:H0YJ20:Q14767	NP_000419.1
Core matrisome	ECM Glycoproteins	LTBP3	latent transforming growth factor beta binding protein 3	6716	Homo sapiens	acromicric dysplasia	DKFZp586M2123|FLJ33431|FLJ39893|FLJ42533|FLJ44138|	6716	E9PJR2:E9PKW1:E9PPT7:E9PQR0:E9PR75:E9PR84:E9PRF2:F5GWC4:H0YC99:H0YCQ2:H0YCX6:H0YE75:Q9NS15	NP_001123616.1:NP_001157738.1:NP_066548.2
Core matrisome	ECM Glycoproteins	LTBP3	latent transforming growth factor beta binding protein 3	6716	Homo sapiens	brachyolmia-amelogenesis imperfecta syndrome	DKFZp586M2123|FLJ33431|FLJ39893|FLJ42533|FLJ44138|	6716	E9PJR2:E9PKW1:E9PPT7:E9PQR0:E9PR75:E9PR84:E9PRF2:F5GWC4:H0YC99:H0YCQ2:H0YCX6:H0YE75:Q9NS15	NP_001123616.1:NP_001157738.1:NP_066548.2
Core matrisome	ECM Glycoproteins	LTBP3	latent transforming growth factor beta binding protein 3	6716	Homo sapiens	geleophysic dysplasia	DKFZp586M2123|FLJ33431|FLJ39893|FLJ42533|FLJ44138|	6716	E9PJR2:E9PKW1:E9PPT7:E9PQR0:E9PR75:E9PR84:E9PRF2:F5GWC4:H0YC99:H0YCQ2:H0YCX6:H0YE75:Q9NS15	NP_001123616.1:NP_001157738.1:NP_066548.2
Core matrisome	ECM Glycoproteins	LTBP3	latent transforming growth factor beta binding protein 3	6716	Homo sapiens	geleophysic dysplasia 3	DKFZp586M2123|FLJ33431|FLJ39893|FLJ42533|FLJ44138|	6716	E9PJR2:E9PKW1:E9PPT7:E9PQR0:E9PR75:E9PR84:E9PRF2:F5GWC4:H0YC99:H0YCQ2:H0YCX6:H0YE75:Q9NS15	NP_001123616.1:NP_001157738.1:NP_066548.2
Core matrisome	ECM Glycoproteins	LTBP4	latent transforming growth factor beta binding protein 4	6717	Homo sapiens	cutis laxa with severe pulmonary, gastrointestinal and urinary anomalies	FLJ46318|FLJ90018|LTBP-4|LTBP4L|LTBP4S	6717	E7ENG9:E7EUU1:F5GXC9:F8WAA0:M0QXV3:M0QYE9:M0QZX0:M0R351:Q8N2S1	NP_001036009.1:NP_001036010.1:NP_003564.2
Core matrisome	ECM Glycoproteins	MATN3	matrilin 3	6909	Homo sapiens	multiple epiphyseal dysplasia type 5	DIPOA|EDM5|HOA|OADIP|OS2	6909	O15232	NP_002372.1
Core matrisome	ECM Glycoproteins	MATN3	matrilin 3	6909	Homo sapiens	spondyloepimetaphyseal dysplasia, matrilin-3 type	DIPOA|EDM5|HOA|OADIP|OS2	6909	O15232	NP_002372.1
Core matrisome	ECM Glycoproteins	MFAP5	microfibrillar associated protein 5	29673	Homo sapiens	aortic aneurysm, familial thoracic 9	MAGP2|MP25	29673	B3KW70:F5GYX4:F5H1C0:F5H2W4:F5H413:F5H7Z2:H0YG03:H0YGS3:Q13361:Q7Z490	NP_003471.1:XP_005253542.1
Core matrisome	ECM Glycoproteins	MFAP5	microfibrillar associated protein 5	29673	Homo sapiens	familial thoracic aortic aneurysm and aortic dissection	MAGP2|MP25	29673	B3KW70:F5GYX4:F5H1C0:F5H2W4:F5H413:F5H7Z2:H0YG03:H0YGS3:Q13361:Q7Z490	NP_003471.1:XP_005253542.1
Core matrisome	ECM Glycoproteins	MGP	matrix Gla protein	7060	Homo sapiens	Keutel syndrome	GIG36|MGLAP|NTI	7060	H0YGZ6:P08493	NP_000891.2:NP_001177768.1
Core matrisome	ECM Glycoproteins	NID1	nidogen 1	7821	Homo sapiens	Dandy-Walker syndrome	NID	7821	P14543	NP_002499.2
Core matrisome	ECM Glycoproteins	NTN1	netrin 1	8029	Homo sapiens	familial congenital mirror movements	NTN1L	8029	H7BZF4:O95631	NP_004813.2:XP_006721658.1
Core matrisome	ECM Glycoproteins	NTNG1	netrin G1	23319	Homo sapiens	atypical Rett syndrome	KIAA0976|Lmnt1	23319	A6NK56:B4DKF0:F5GYT0:F8WEB5:Q9Y2I2	NP_001106697.1:NP_001106699.1:NP_055732.2:XP_006710519.1
Core matrisome	ECM Glycoproteins	OTOG	otogelin	8516	Homo sapiens	autosomal recessive nonsyndromic deafness	FLJ46346|OTGN|mlemp	8516	C9IZ84:H9KVB3:Q6ZRI0	NP_001264198.1
Core matrisome	ECM Glycoproteins	OTOG	otogelin	8516	Homo sapiens	autosomal recessive nonsyndromic deafness 18B	FLJ46346|OTGN|mlemp	8516	C9IZ84:H9KVB3:Q6ZRI0	NP_001264198.1
Core matrisome	ECM Glycoproteins	PXDN	peroxidasin homolog (Drosophila)	14966	Homo sapiens	anterior segment dysgenesis 7	D2S448|D2S448E|KIAA0230|MG50|PRG2|PXN|VPO	14966	C9J4I9:H7C1W1:H7C300:H7C3W2:Q92626	NP_036425.1
Core matrisome	ECM Glycoproteins	RELN	reelin	9957	Homo sapiens	familial temporal lobe epilepsy 1	PRO1598|RL	9957	H7C2B0:J3KQ66:P78509	NP_005036.2:NP_774959.1
Core matrisome	ECM Glycoproteins	RELN	reelin	9957	Homo sapiens	Norman-Roberts syndrome	PRO1598|RL	9957	H7C2B0:J3KQ66:P78509	NP_005036.2:NP_774959.1
Core matrisome	ECM Glycoproteins	RSPO1	R-spondin homolog (Xenopus laevis)	21679	Homo sapiens	palmoplantar keratoderma-XX sex reversal-predisposition to squamous cell carcinoma syndrome	CRISTIN3|FLJ40906|RSPO	21679	Q2MKA7	NP_001033722.1:NP_001229837.1:NP_001229838.1:NP_001229839.1:XP_006710646.1
Core matrisome	ECM Glycoproteins	RSPO2	R-spondin 2 homolog (Xenopus laevis)	28583	Homo sapiens	tetraamelia syndrome 2	CRISTIN2|MGC35555|MGC43342	28583	E5RGU9:E5RH25:E5RHC3:E5RJA2:E5RJU7:Q6UXX9	NP_001269792.1:NP_848660.3:XP_005250963.1
Core matrisome	ECM Glycoproteins	RSPO2	R-spondin 2 homolog (Xenopus laevis)	28583	Homo sapiens	tetraamelia-multiple malformations syndrome	CRISTIN2|MGC35555|MGC43342	28583	E5RGU9:E5RH25:E5RHC3:E5RJA2:E5RJU7:Q6UXX9	NP_001269792.1:NP_848660.3:XP_005250963.1
Core matrisome	ECM Glycoproteins	RSPO4	R-spondin family, member 4	16175	Homo sapiens	nonsyndromic congenital nail disorder 4	C20orf182|CRISTIN4|FLJ16018	16175	Q2I0M5	NP_001025042.2:NP_001035096.1
Core matrisome	ECM Glycoproteins	SMOC1	SPARC related modular calcium binding 1	20318	Homo sapiens	microphthalmia with limb anomalies	-	20318	Q9H4F8	NP_001030024.1:NP_071420.1
Core matrisome	ECM Glycoproteins	SMOC2	SPARC related modular calcium binding 2	20323	Homo sapiens	atypical dentin dysplasia due to SMOC2 deficiency	MST117|MSTP117|MSTP140|SMAP2|bA270C4A.1|bA37D8.1|d	20323	H0Y3J4:H0Y5I1:Q9H3U7	NP_001159884.1:NP_071421.1
Core matrisome	ECM Glycoproteins	SMOC2	SPARC related modular calcium binding 2	20323	Homo sapiens	dentin dysplasia type I	MST117|MSTP117|MSTP140|SMAP2|bA270C4A.1|bA37D8.1|d	20323	H0Y3J4:H0Y5I1:Q9H3U7	NP_001159884.1:NP_071421.1
Core matrisome	ECM Glycoproteins	SPARC	secreted protein, acidic, cysteine-rich (osteonectin)	11219	Homo sapiens	osteogenesis imperfecta type 17	ON	11219	E5RJA5:E5RK62:F5GY03:F5H4E2:P09486	NP_003109.1
Core matrisome	ECM Glycoproteins	SPARC	secreted protein, acidic, cysteine-rich (osteonectin)	11219	Homo sapiens	osteogenesis imperfecta type 4	ON	11219	E5RJA5:E5RK62:F5GY03:F5H4E2:P09486	NP_003109.1
Core matrisome	ECM Glycoproteins	SRPX2	sushi-repeat-containing protein, X-linked 2	30668	Homo sapiens	rolandic epilepsy-speech dyspraxia syndrome	BPP|CBPS|PMGX|RESDX|SRPUL	30668	O60687	NP_055282.1:XP_005262178.1
Core matrisome	ECM Glycoproteins	TECTA	tectorin alpha	11720	Homo sapiens	autosomal dominant nonsyndromic deafness	DFNA12|DFNA8|DFNB21	11720	O75443	NP_005413.2
Core matrisome	ECM Glycoproteins	TECTA	tectorin alpha	11720	Homo sapiens	autosomal dominant nonsyndromic deafness 12	DFNA12|DFNA8|DFNB21	11720	O75443	NP_005413.2
Core matrisome	ECM Glycoproteins	TECTA	tectorin alpha	11720	Homo sapiens	autosomal recessive nonsyndromic deafness	DFNA12|DFNA8|DFNB21	11720	O75443	NP_005413.2
Core matrisome	ECM Glycoproteins	TECTA	tectorin alpha	11720	Homo sapiens	autosomal recessive nonsyndromic deafness 21	DFNA12|DFNA8|DFNB21	11720	O75443	NP_005413.2
Core matrisome	ECM Glycoproteins	TGFBI	transforming growth factor, beta-induced, 68kDa	11771	Homo sapiens	corneal dystrophy, lattice type 3A	BIGH3|CDB1|CDG2|CDGG1|CSD|CSD1|CSD2|CSD3|EBMD|LCD1	11771	D6RBX4:G8JLA8:H0Y8L3:H0Y8M8:H0Y9D7:H0YAB8:H0YAH8:Q15582:S4R3C6	NP_000349.1
Core matrisome	ECM Glycoproteins	TGFBI	transforming growth factor, beta-induced, 68kDa	11771	Homo sapiens	epithelial basement membrane dystrophy	BIGH3|CDB1|CDG2|CDGG1|CSD|CSD1|CSD2|CSD3|EBMD|LCD1	11771	D6RBX4:G8JLA8:H0Y8L3:H0Y8M8:H0Y9D7:H0YAB8:H0YAH8:Q15582:S4R3C6	NP_000349.1
Core matrisome	ECM Glycoproteins	TGFBI	transforming growth factor, beta-induced, 68kDa	11771	Homo sapiens	granular corneal dystrophy type I	BIGH3|CDB1|CDG2|CDGG1|CSD|CSD1|CSD2|CSD3|EBMD|LCD1	11771	D6RBX4:G8JLA8:H0Y8L3:H0Y8M8:H0Y9D7:H0YAB8:H0YAH8:Q15582:S4R3C6	NP_000349.1
Core matrisome	ECM Glycoproteins	TGFBI	transforming growth factor, beta-induced, 68kDa	11771	Homo sapiens	granular corneal dystrophy type II	BIGH3|CDB1|CDG2|CDGG1|CSD|CSD1|CSD2|CSD3|EBMD|LCD1	11771	D6RBX4:G8JLA8:H0Y8L3:H0Y8M8:H0Y9D7:H0YAB8:H0YAH8:Q15582:S4R3C6	NP_000349.1
Core matrisome	ECM Glycoproteins	TGFBI	transforming growth factor, beta-induced, 68kDa	11771	Homo sapiens	lattice corneal dystrophy type I	BIGH3|CDB1|CDG2|CDGG1|CSD|CSD1|CSD2|CSD3|EBMD|LCD1	11771	D6RBX4:G8JLA8:H0Y8L3:H0Y8M8:H0Y9D7:H0YAB8:H0YAH8:Q15582:S4R3C6	NP_000349.1
Core matrisome	ECM Glycoproteins	TGFBI	transforming growth factor, beta-induced, 68kDa	11771	Homo sapiens	Reis-Bucklers corneal dystrophy	BIGH3|CDB1|CDG2|CDGG1|CSD|CSD1|CSD2|CSD3|EBMD|LCD1	11771	D6RBX4:G8JLA8:H0Y8L3:H0Y8M8:H0Y9D7:H0YAB8:H0YAH8:Q15582:S4R3C6	NP_000349.1
Core matrisome	ECM Glycoproteins	TGFBI	transforming growth factor, beta-induced, 68kDa	11771	Homo sapiens	Thiel-Behnke corneal dystrophy	BIGH3|CDB1|CDG2|CDGG1|CSD|CSD1|CSD2|CSD3|EBMD|LCD1	11771	D6RBX4:G8JLA8:H0Y8L3:H0Y8M8:H0Y9D7:H0YAB8:H0YAH8:Q15582:S4R3C6	NP_000349.1
Core matrisome	ECM Glycoproteins	TNC	tenascin C	5318	Homo sapiens	autosomal dominant nonsyndromic deafness	150-225|GMEM|GP|HXB|JI|MGC167029|TN	5318	E9PC84:F5H5D6:F5H7V9:H0YGZ3:J3QSU6:P24821	NP_002151.2:XP_005252029.1:XP_005252031.1:XP_005252032.1:XP_006717161.1:XP_006717163.1
Core matrisome	ECM Glycoproteins	TNC	tenascin C	5318	Homo sapiens	autosomal dominant nonsyndromic deafness 56	150-225|GMEM|GP|HXB|JI|MGC167029|TN	5318	E9PC84:F5H5D6:F5H7V9:H0YGZ3:J3QSU6:P24821	NP_002151.2:XP_005252029.1:XP_005252031.1:XP_005252032.1:XP_006717161.1:XP_006717163.1
Core matrisome	ECM Glycoproteins	TNXB	tenascin XB	11976	Homo sapiens	Ehlers-Danlos syndrome due to tenascin-X deficiency	HXBL|TENX|TNX|TNXB1|TNXB2|TNXBS|XB|XBS	11976	C9J7W4:E7EPZ9:P22105	NP_061978.6:NP_115859.2
Core matrisome	ECM Glycoproteins	TNXB	tenascin XB	11976	Homo sapiens	familial vesicoureteral reflux	HXBL|TENX|TNX|TNXB1|TNXB2|TNXBS|XB|XBS	11976	C9J7W4:E7EPZ9:P22105	NP_061978.6:NP_115859.2
Core matrisome	ECM Glycoproteins	TNXB	tenascin XB	11976	Homo sapiens	vesicoureteral reflux 8	HXBL|TENX|TNX|TNXB1|TNXB2|TNXBS|XB|XBS	11976	C9J7W4:E7EPZ9:P22105	NP_061978.6:NP_115859.2
Core matrisome	ECM Glycoproteins	TSPEAR	chromosome 21 open reading frame 29	1268	Homo sapiens	autosomal recessive nonsyndromic deafness	MGC11251|TSPEAR|C21orf29	1268	A8MW19:Q8WU66	NP_001258966.1:NP_659428.2:XP_005261214.1
Core matrisome	ECM Glycoproteins	ZP1	zona pellucida glycoprotein 1 (sperm receptor)	13187	Homo sapiens	female infertility due to zona pellucida defect	MGC87693	13187	H0YG11:P60852	NP_997224.2
Core matrisome	ECM Glycoproteins	ZP2	zona pellucida glycoprotein 2 (sperm receptor)	13188	Homo sapiens	female infertility due to zona pellucida defect	ZPA	13188	Q05996	NP_001277033.1:NP_003451.1
Core matrisome	ECM Glycoproteins	ZP3	zona pellucida glycoprotein 3 (sperm receptor)	13189	Homo sapiens	female infertility due to zona pellucida defect	ZP3A|ZP3B|ZPC	13189	E9PFI9:H0Y3M4:P21754	NP_001103824.1:NP_009086.4
Core matrisome	ECM Glycoproteins	ZP3	zona pellucida glycoprotein 3 (sperm receptor)	13189	Homo sapiens	oocyte maturation defect 3	ZP3A|ZP3B|ZPC	13189	E9PFI9:H0Y3M4:P21754	NP_001103824.1:NP_009086.4
Core matrisome	Proteoglycans	ACAN	aggrecan	319	Homo sapiens	osteochondritis dissecans (disease)	AGC1|AGCAN|CSPG1|CSPGCP|MSK16|SEDK	319	E7ENV9:E7EX88:H0YK70:H0YM81:H0YMF1:P16112:Q6PID9	NP_001126.3:NP_037359.3
Core matrisome	Proteoglycans	ACAN	aggrecan	319	Homo sapiens	short stature-advanced bone age-early-onset osteoarthritis syndrome	AGC1|AGCAN|CSPG1|CSPGCP|MSK16|SEDK	319	E7ENV9:E7EX88:H0YK70:H0YM81:H0YMF1:P16112:Q6PID9	NP_001126.3:NP_037359.3
Core matrisome	Proteoglycans	ACAN	aggrecan	319	Homo sapiens	spondyloepimetaphyseal dysplasia, aggrecan type	AGC1|AGCAN|CSPG1|CSPGCP|MSK16|SEDK	319	E7ENV9:E7EX88:H0YK70:H0YM81:H0YMF1:P16112:Q6PID9	NP_001126.3:NP_037359.3
Core matrisome	Proteoglycans	ACAN	aggrecan	319	Homo sapiens	spondyloepiphyseal dysplasia, Kimberley type	AGC1|AGCAN|CSPG1|CSPGCP|MSK16|SEDK	319	E7ENV9:E7EX88:H0YK70:H0YM81:H0YMF1:P16112:Q6PID9	NP_001126.3:NP_037359.3
Core matrisome	Proteoglycans	BGN	biglycan	1044	Homo sapiens	Meester-Loeys syndrome	DSPG1|PG-S1|PGI|SLRR1A	1044	C9JKG1:P21810	NP_001702.1
Core matrisome	Proteoglycans	BGN	biglycan	1044	Homo sapiens	X-linked spondyloepimetaphyseal dysplasia	DSPG1|PG-S1|PGI|SLRR1A	1044	C9JKG1:P21810	NP_001702.1
Core matrisome	Proteoglycans	DCN	decorin	2705	Homo sapiens	congenital stromal corneal dystrophy	CSCD|DSPG2|PG40|PGII|PGS2|SLRR1B	2705	F8VNV6:F8VNW0:F8VSI3:F8VU58:F8VUF6:F8VWU0:F8VX58:F8VXZ8:H0YI87:H0YIH3:P07585	NP_001911.1:NP_598010.1:NP_598011.1:NP_598012.1:NP_598013.1:NP_598014.1:XP_005268750.1:XP_006719333.1
Core matrisome	Proteoglycans	HSPG2	heparan sulfate proteoglycan 2	5273	Homo sapiens	Schwartz-Jampel syndrome	PLC|PRCAN|SJA|SJS|SJS1	5273	H0Y5A9:H7BYA5:H7C4A6:P98160:Q5SZI5:Q5SZI9:Q5SZJ1:Q5SZJ2	NP_001278789.1:NP_005520.4
Core matrisome	Proteoglycans	HSPG2	heparan sulfate proteoglycan 2	5273	Homo sapiens	Silverman-Handmaker type dyssegmental dysplasia	PLC|PRCAN|SJA|SJS|SJS1	5273	H0Y5A9:H7BYA5:H7C4A6:P98160:Q5SZI5:Q5SZI9:Q5SZJ1:Q5SZJ2	NP_001278789.1:NP_005520.4
Core matrisome	Proteoglycans	IMPG1	interphotoreceptor matrix proteoglycan 1	6055	Homo sapiens	adult-onset foveomacular vitelliform dystrophy	GP147|IPM150|SPACR	6055	Q17R60:Q5JSC4:Q68D53	NP_001269297.1:NP_001554.2
Core matrisome	Proteoglycans	IMPG1	interphotoreceptor matrix proteoglycan 1	6055	Homo sapiens	vitelliform macular dystrophy 4	GP147|IPM150|SPACR	6055	Q17R60:Q5JSC4:Q68D53	NP_001269297.1:NP_001554.2
Core matrisome	Proteoglycans	IMPG2	interphotoreceptor matrix proteoglycan 2	18362	Homo sapiens	adult-onset foveomacular vitelliform dystrophy	IPM200|SPACRCAN	18362	Q9BZV3	NP_057331.2
Core matrisome	Proteoglycans	IMPG2	interphotoreceptor matrix proteoglycan 2	18362	Homo sapiens	retinitis pigmentosa	IPM200|SPACRCAN	18362	Q9BZV3	NP_057331.2
Core matrisome	Proteoglycans	IMPG2	interphotoreceptor matrix proteoglycan 2	18362	Homo sapiens	retinitis pigmentosa 56	IPM200|SPACRCAN	18362	Q9BZV3	NP_057331.2
Core matrisome	Proteoglycans	IMPG2	interphotoreceptor matrix proteoglycan 2	18362	Homo sapiens	vitelliform macular dystrophy 5	IPM200|SPACRCAN	18362	Q9BZV3	NP_057331.2
Core matrisome	Proteoglycans	KERA	keratocan	6309	Homo sapiens	congenital cornea plana	CNA2|SLRR2B	6309	O60938	NP_008966.1
Core matrisome	Proteoglycans	KERA	keratocan	6309	Homo sapiens	cornea plana 2	CNA2|SLRR2B	6309	O60938	NP_008966.1
Core matrisome	Proteoglycans	NYX	nyctalopin	8082	Homo sapiens	congenital stationary night blindness	CLRP|CSNB1|CSNB4|MGC138447	8082	Q9GZU5	NP_072089.1:XP_005272689.1
Core matrisome	Proteoglycans	NYX	nyctalopin	8082	Homo sapiens	congenital stationary night blindness 1A	CLRP|CSNB1|CSNB4|MGC138447	8082	Q9GZU5	NP_072089.1:XP_005272689.1
Core matrisome	Proteoglycans	PRG4	p53-responsive gene 4	9364	Homo sapiens	camptodactyly-arthropathy-coxa vara-pericarditis syndrome	-	9364	E7EQ48:E9PLR3:J3KP74:Q92954	NP_001121180.1:NP_001121181.1:NP_001121182.1:NP_005798.2
Core matrisome	Proteoglycans	VCAN	versican	2464	Homo sapiens	Wagner disease	CSPG2|DKFZp686K06110|ERVR|GHAP|PG-M|WGN|WGN1	2464	D6RGZ6:E9PF17:P13611:Q86W61	NP_001119808.1:NP_001119808.1:NP_001157569.1:NP_001157570.1:NP_004376.2
Matrisome-associated	ECM Regulators	A2ML1	alpha-2-macroglobulin-like 1	23336	Homo sapiens	Noonan syndrome	CPAMD9|DKFZp686C1729|DKFZp686D2011|DKFZp686G1812|D	23336	A8K2U0:F5GXP1:F5GYG7:F5H2Z2:H0YGG5:H0YH14	NP_653271.2
Matrisome-associated	ECM Regulators	ADAM10	ADAM metallopeptidase domain 10	188	Homo sapiens	reticulate acropigmentation of Kitamura	AD10|CD156c|HsT18717|MADM|kuz	188	B4DU28:B5MC71:C9J9B4:H0YK32:H0YK87:H0YNC5:H3BS53:O14672	NP_001101.1
Matrisome-associated	ECM Regulators	ADAM17	ADAM metallopeptidase domain 17	195	Homo sapiens	neonatal inflammatory skin and bowel disease	ADAM18|CD156B|CSVP|MGC71942|TACE	195	E7EUI5:P78536	NP_003174.3
Matrisome-associated	ECM Regulators	ADAM9	ADAM metallopeptidase domain 9 (meltrin gamma)	216	Homo sapiens	cone-rod dystrophy	CORD9|KIAA0021|MCMP|MDC9|Mltng	216	A0AVL1:C9J6H5:C9JPM3:F8WC54:Q13443	NP_003807.1
Matrisome-associated	ECM Regulators	ADAM9	ADAM metallopeptidase domain 9 (meltrin gamma)	216	Homo sapiens	cone-rod dystrophy 9	CORD9|KIAA0021|MCMP|MDC9|Mltng	216	A0AVL1:C9J6H5:C9JPM3:F8WC54:Q13443	NP_003807.1
Matrisome-associated	ECM Regulators	ADAMTS10	ADAM metallopeptidase with thrombospondin type 1 motif, 10	13201	Homo sapiens	Weill-Marchesani syndrome	ADAM-TS10|WMS	13201	M0QY12:M0QY36:Q9H324	NP_001269281.1:NP_112219.3
Matrisome-associated	ECM Regulators	ADAMTS10	ADAM metallopeptidase with thrombospondin type 1 motif, 10	13201	Homo sapiens	Weill-Marchesani syndrome 1	ADAM-TS10|WMS	13201	M0QY12:M0QY36:Q9H324	NP_001269281.1:NP_112219.3
Matrisome-associated	ECM Regulators	ADAMTS13	ADAM metallopeptidase with thrombospondin type 1 motif, 13	1366	Homo sapiens	congenital thrombotic thrombocytopenic purpura	C9orf8|DKFZp434C2322|FLJ42993|MGC118899|MGC118900|	1366	E7EV88:Q76LX8:Q9UGQ1	NP_620594.1:NP_620595.1:NP_620596.2
Matrisome-associated	ECM Regulators	ADAMTS17	ADAM metallopeptidase with thrombospondin type 1 motif, 17	17109	Homo sapiens	ichthyosis-short stature-brachydactyly-microspherophakia syndrome	FLJ16363|FLJ32769	17109	H0YMH1:H3BRA9:H3BV94:Q8TE56	NP_620688.2
Matrisome-associated	ECM Regulators	ADAMTS18	ADAM metallopeptidase with thrombospondin type 1 motif, 18	17110	Homo sapiens	microcornea-myopic chorioretinal atrophy-telecanthus syndrome	ADAMTS21	17110	B4DEX3:H3BMG1:H3BTZ3:Q8TE60	NP_955387.1
Matrisome-associated	ECM Regulators	ADAMTS2	ADAM metallopeptidase with thrombospondin type 1 motif, 2	218	Homo sapiens	Ehlers-Danlos syndrome, dermatosparaxis type	ADAM-TS2|ADAMTS-3|NPI|PCINP|PCPNI|hPCPNI	218	O95450	NP_055059.2:NP_067610.1
Matrisome-associated	ECM Regulators	ADAMTS3	ADAM metallopeptidase with thrombospondin type 1 motif, 3	219	Homo sapiens	Hennekam syndrome	ADAMTS-4|KIAA0366	219	O15072	NP_055058.2
Matrisome-associated	ECM Regulators	ADAMTS9	ADAM metallopeptidase with thrombospondin type 1 motif, 9	13202	Homo sapiens	nephronophthisis 1	FLJ42955|KIAA1312	13202	C9JWI2:H0Y859:Q9P2N4	NP_891550.1:XP_005265386.1
Matrisome-associated	ECM Regulators	ADAMTSL2	ADAMTS-like 2	14631	Homo sapiens	geleophysic dysplasia	FLJ45164|KIAA0605	14631	B1B0D4:Q86TH1	NP_001138792.1:NP_055509.2:XP_005272296.1:XP_006717400.1:XP_005272294.1
Matrisome-associated	ECM Regulators	ADAMTSL2	ADAMTS-like 2	14631	Homo sapiens	geleophysic dysplasia 1	FLJ45164|KIAA0605	14631	B1B0D4:Q86TH1	NP_001138792.1:NP_055509.2:XP_005272296.1:XP_006717400.1:XP_005272294.1
Matrisome-associated	ECM Regulators	ADAMTSL4	ADAMTS-like 4	19706	Homo sapiens	ectopia lentis 2, isolated, autosomal recessive	TSRC1	19706	F8WAD0:Q6UY14	NP_001275536.1:NP_001275537.1:NP_061905.2:NP_079284.2:NP_001275537.1
Matrisome-associated	ECM Regulators	ADAMTSL4	ADAMTS-like 4	19706	Homo sapiens	ectopia lentis et pupillae	TSRC1	19706	F8WAD0:Q6UY14	NP_001275536.1:NP_001275537.1:NP_061905.2:NP_079284.2:NP_001275537.1
Matrisome-associated	ECM Regulators	ADAMTSL4	ADAMTS-like 4	19706	Homo sapiens	isolated ectopia lentis	TSRC1	19706	F8WAD0:Q6UY14	NP_001275536.1:NP_001275537.1:NP_061905.2:NP_079284.2:NP_001275537.1
Matrisome-associated	ECM Regulators	BMP1	bone morphogenetic protein 1	1067	Homo sapiens	high bone mass osteogenesis imperfecta	FLJ44432|PCOLC|PCP|PCP2|TLD	1067	B7ZKR5:E5RH22:P13497:Q3MIM8	NP_001190.1:NP_006120.1
Matrisome-associated	ECM Regulators	BMP1	bone morphogenetic protein 1	1067	Homo sapiens	osteogenesis imperfecta type 13	FLJ44432|PCOLC|PCP|PCP2|TLD	1067	B7ZKR5:E5RH22:P13497:Q3MIM8	NP_001190.1:NP_006120.1
Matrisome-associated	ECM Regulators	BMP1	bone morphogenetic protein 1	1067	Homo sapiens	osteogenesis imperfecta type 3	FLJ44432|PCOLC|PCP|PCP2|TLD	1067	B7ZKR5:E5RH22:P13497:Q3MIM8	NP_001190.1:NP_006120.1
Matrisome-associated	ECM Regulators	CPAMD8	C3 and PZP-like, alpha-2-macroglobulin domain containing 8	23228	Homo sapiens	anterior segment dysgenesis 8	FLJ42058|FLJ90618|K-CAP|KIAA1283|VIP	23228	F8W7D1:M0QXH3:M0R0Z5:M0R3G7:Q8IZJ3	NP_056507.2
Matrisome-associated	ECM Regulators	CST3	cystatin C	2475	Homo sapiens	ACys amyloidosis	ARMD11|MGC117328	2475	P01034	NP_000090.1:NP_001275543.1
Matrisome-associated	ECM Regulators	CSTA	cystatin A (stefin A)	2481	Homo sapiens	acral peeling skin syndrome	STF1|STFA	2481	C9J0E4:P01040	NP_005204.1
Matrisome-associated	ECM Regulators	CSTA	cystatin A (stefin A)	2481	Homo sapiens	exfoliative ichthyosis	STF1|STFA	2481	C9J0E4:P01040	NP_005204.1
Matrisome-associated	ECM Regulators	CSTA	cystatin A (stefin A)	2481	Homo sapiens	peeling skin syndrome 4	STF1|STFA	2481	C9J0E4:P01040	NP_005204.1
Matrisome-associated	ECM Regulators	CSTB	cystatin B (stefin B)	2482	Homo sapiens	Unverricht-Lundborg syndrome	CST6|EPM1|PME|STFB	2482	P04080	NP_000091.1
Matrisome-associated	ECM Regulators	CTSA	cathepsin A	9251	Homo sapiens	galactosialidosis	GLB2|GSL|NGBE|PPCA|PPGB	9251	P10619:Q5JZG9:Q5JZH0:U3KQ41:U3KQF1:U3KQU6:X6R5C5:X6R8A1	NP_000299.2:NP_000299.2:NP_001121167.1:NP_001161066.1:NP_001161066.1
Matrisome-associated	ECM Regulators	CTSB	cathepsin B	2527	Homo sapiens	keratolytic winter erythema	APPS|CPSB	2527	E9PCB3:E9PHZ5:E9PID0:E9PIS1:E9PJ67:E9PKQ7:E9PKX0:E9PL32:E9PLY3:E9PNL5:E9PQM1:E9PR00:E9PR54:E9PS78:E9PSG5:P07858:R4GMQ5	NP_001899.1:NP_680090.1:NP_680091.1:NP_680092.1:NP_680093.1:XP_006716307.1:XP_006716308.1
Matrisome-associated	ECM Regulators	CTSC	cathepsin C	2528	Homo sapiens	aggressive periodontitis	CPPI|DPP1|DPPI|HMS|JP|JPD|PALS|PLS	2528	H0YCY8:H0YDA2:P53634	NP_001107645.1:NP_001805.3:NP_680475.1
Matrisome-associated	ECM Regulators	CTSC	cathepsin C	2528	Homo sapiens	Haim-Munk syndrome	CPPI|DPP1|DPPI|HMS|JP|JPD|PALS|PLS	2528	H0YCY8:H0YDA2:P53634	NP_001107645.1:NP_001805.3:NP_680475.1
Matrisome-associated	ECM Regulators	CTSC	cathepsin C	2528	Homo sapiens	Papillon-Lefevre disease	CPPI|DPP1|DPPI|HMS|JP|JPD|PALS|PLS	2528	H0YCY8:H0YDA2:P53634	NP_001107645.1:NP_001805.3:NP_680475.1
Matrisome-associated	ECM Regulators	CTSD	cathepsin D	2529	Homo sapiens	neuronal ceroid lipofuscinosis 10	CLN10|CPSD|MGC2311	2529	C9JH19:F8W787:F8WD96:H7C1V0:P07339	NP_001900.1
Matrisome-associated	ECM Regulators	CTSF	cathepsin F	2531	Homo sapiens	neuronal ceroid lipofuscinosis 13	CATSF	2531	E9PSC2:H0YD65:H0YE42:Q9UBX1	NP_003784.2
Matrisome-associated	ECM Regulators	EGLN1	egl nine homolog 1 (C. elegans)	1232	Homo sapiens	autosomal dominant secondary polycythemia	C1orf12|DKFZp761F179|ECYT3|HIFPH2|HPH2|PHD2|SM20|Z	1232	Q9GZT9	NP_071334.1
Matrisome-associated	ECM Regulators	EGLN1	egl nine homolog 1 (C. elegans)	1232	Homo sapiens	erythrocytosis, familial, 3	C1orf12|DKFZp761F179|ECYT3|HIFPH2|HPH2|PHD2|SM20|Z	1232	Q9GZT9	NP_071334.1
Matrisome-associated	ECM Regulators	ELANE	elastase, neutrophil expressed	3309	Homo sapiens	autosomal dominant severe congenital neutropenia	ELA2|GE|HLE|HNE|NE|PMN-E|SCN1	3309	P08246	NP_001963.1:XP_005259574.1:XP_006725460.1
Matrisome-associated	ECM Regulators	ELANE	elastase, neutrophil expressed	3309	Homo sapiens	cyclic hematopoiesis	ELA2|GE|HLE|HNE|NE|PMN-E|SCN1	3309	P08246	NP_001963.1:XP_005259574.1:XP_006725460.1
Matrisome-associated	ECM Regulators	ELANE	elastase, neutrophil expressed	3309	Homo sapiens	neutropenia, severe congenital, 1, autosomal dominant	ELA2|GE|HLE|HNE|NE|PMN-E|SCN1	3309	P08246	NP_001963.1:XP_005259574.1:XP_006725460.1
Matrisome-associated	ECM Regulators	F10	coagulation factor X	3528	Homo sapiens	congenital factor X deficiency	FX|FXA	3528	B7ZBK1:F8WBM7:P00742:Q5JVE8	NP_000495.1:XP_005268355.1
Matrisome-associated	ECM Regulators	F13A1	coagulation factor XIII, A1 polypeptide	3531	Homo sapiens	congenital factor XIII deficiency	F13A	3531	A6PVK5:H0Y4W5:H0Y796:P00488:Q9NQP5	NP_000120.2:XP_006715073.1
Matrisome-associated	ECM Regulators	F13A1	coagulation factor XIII, A1 polypeptide	3531	Homo sapiens	factor XIII, A subunit, deficiency of	F13A	3531	A6PVK5:H0Y4W5:H0Y796:P00488:Q9NQP5	NP_000120.2:XP_006715073.1
Matrisome-associated	ECM Regulators	F13B	coagulation factor XIII, B polypeptide	3534	Homo sapiens	congenital factor XIII deficiency	FXIIIB	3534	P05160	NP_001985.2
Matrisome-associated	ECM Regulators	F13B	coagulation factor XIII, B polypeptide	3534	Homo sapiens	factor XIII, b subunit, deficiency of	FXIIIB	3534	P05160	NP_001985.2
Matrisome-associated	ECM Regulators	F7	coagulation factor VII (serum prothrombin conversion accelerator)	3544	Homo sapiens	congenital factor VII deficiency	-	3544	E9PH36:F5H8B0:P08709	NP_000122.1:NP_062562.1
Matrisome-associated	ECM Regulators	F9	coagulation factor IX	3551	Homo sapiens	hemophilia B	FIX|HEMB|MGC129641|MGC129642|PTC	3551	P00740	NP_000124.1
Matrisome-associated	ECM Regulators	F9	coagulation factor IX	3551	Homo sapiens	mild hemophilia B	FIX|HEMB|MGC129641|MGC129642|PTC	3551	P00740	NP_000124.1
Matrisome-associated	ECM Regulators	F9	coagulation factor IX	3551	Homo sapiens	moderately severe hemophilia B	FIX|HEMB|MGC129641|MGC129642|PTC	3551	P00740	NP_000124.1
Matrisome-associated	ECM Regulators	F9	coagulation factor IX	3551	Homo sapiens	severe hemophilia B	FIX|HEMB|MGC129641|MGC129642|PTC	3551	P00740	NP_000124.1
Matrisome-associated	ECM Regulators	F9	coagulation factor IX	3551	Homo sapiens	symptomatic form of hemophilia B in female carriers	FIX|HEMB|MGC129641|MGC129642|PTC	3551	P00740	NP_000124.1
Matrisome-associated	ECM Regulators	F9	coagulation factor IX	3551	Homo sapiens	thrombophilia, X-linked, due to factor 9 defect	FIX|HEMB|MGC129641|MGC129642|PTC	3551	P00740	NP_000124.1
Matrisome-associated	ECM Regulators	FAM20A	family with sequence similarity 20, member A	23015	Homo sapiens	amelogenesis imperfecta type 1G	DKFZp434F2322	23015	K7EIV7:K7EQL5:Q96MK3	NP_001230675.1:NP_060035.2
Matrisome-associated	ECM Regulators	FAM20C	family with sequence similarity 20, member C	22140	Homo sapiens	lethal osteosclerotic bone dysplasia	"dentin matrix protein 4", DKFZp547D065, DMP4, IMAGE:4942737	22140	Q8IXL6	NP_064608.2:XP_005249871.1
Matrisome-associated	ECM Regulators	HABP2	hyaluronan binding protein 2	4798	Homo sapiens	familial papillary or follicular thyroid carcinoma	FSAP|HABP|HGFAL|PHBP	4798	B7Z8Q5:F5H475:Q14520	NP_001171131.1:NP_004123.1
Matrisome-associated	ECM Regulators	HPSE2	heparanase 2	18374	Homo sapiens	Ochoa syndrome	FLJ11684|FLJ44022|HPA2|HPR2|MGC133234	18374	Q8WWQ2	NP_001159716.1:NP_001159717.1:NP_001159718.1:NP_068600.4
Matrisome-associated	ECM Regulators	HPSE2	heparanase 2	18374	Homo sapiens	urofacial syndrome type 1	FLJ11684|FLJ44022|HPA2|HPR2|MGC133234	18374	Q8WWQ2	NP_001159716.1:NP_001159717.1:NP_001159718.1:NP_068600.4
Matrisome-associated	ECM Regulators	HRG	histidine-rich glycoprotein	5181	Homo sapiens	hereditary thrombophilia due to congenital histidine-rich (poly-L) glycoprotein deficiency	DKFZp779H1622|HPRG|HRGP	5181	P04196	NP_000403.1
Matrisome-associated	ECM Regulators	HTRA1	HtrA serine peptidase 1	9476	Homo sapiens	CARASIL	ARMD7|HtrA|L56|ORF480|PRSS11	9476	H0Y7G9:Q92743	NP_002766.1
Matrisome-associated	ECM Regulators	HTRA1	HtrA serine peptidase 1	9476	Homo sapiens	cerebral arteriopathy, autosomal dominant, with subcortical infarcts and leukoencephalopathy, type 2	ARMD7|HtrA|L56|ORF480|PRSS11	9476	H0Y7G9:Q92743	NP_002766.1
Matrisome-associated	ECM Regulators	HTRA1	HtrA serine peptidase 1	9476	Homo sapiens	HTRA1-related autosomal dominant cerebral small vessel disease	ARMD7|HtrA|L56|ORF480|PRSS11	9476	H0Y7G9:Q92743	NP_002766.1
Matrisome-associated	ECM Regulators	HYAL1	hyaluronoglucosaminidase 1	5320	Homo sapiens	mucopolysaccharidosis type 9	HYAL-1|LUCA1|MGC45987|NAT6	5320	C9JB49:C9JRK1:Q12794	NP_149349.2:NP_695013.1:NP_695014.1:NP_695015.1:NP_695017.1
Matrisome-associated	ECM Regulators	KY	kyphoscoliosis peptidase	26576	Homo sapiens	kyphoscoliosis-lateral tongue atrophy-hereditary spastic paraplegia syndrome	FLJ33207	26576	B4DGA7:Q8NBH2	NP_848649.3
Matrisome-associated	ECM Regulators	KY	kyphoscoliosis peptidase	26576	Homo sapiens	kyphosis-lateral tongue atrophy-myofibrillar myopathy syndrome	FLJ33207	26576	B4DGA7:Q8NBH2	NP_848649.3
Matrisome-associated	ECM Regulators	KY	kyphoscoliosis peptidase	26576	Homo sapiens	myofibrillar myopathy 7	FLJ33207	26576	B4DGA7:Q8NBH2	NP_848649.3
Matrisome-associated	ECM Regulators	LOX	lysyl oxidase	6664	Homo sapiens	aortic aneurysm, familial thoracic 10	MGC105112	6664	H0YAL3:P28300	NP_002308.2
Matrisome-associated	ECM Regulators	LOX	lysyl oxidase	6664	Homo sapiens	familial thoracic aortic aneurysm and aortic dissection	MGC105112	6664	H0YAL3:P28300	NP_002308.2
Matrisome-associated	ECM Regulators	LOXL3	lysyl oxidase-like 3	13869	Homo sapiens	autosomal recessive Stickler syndrome	LOXL	13869	B8ZZT6:B9A025:C9J5M1:E7END4:H7C248:P58215	NP_001276093.1:NP_001276094.1:NP_115992.1
Matrisome-associated	ECM Regulators	MASP1	mannan-binding lectin serine peptidase 1 (C4/C2 activating component of Ra-reactive factor)	6901	Homo sapiens	MC syndrome	CRARF|CRARF1|DKFZp686I01199|FLJ26383|MASP|MGC12628	6901	C9J1C7:C9JLU5:C9JMA2:F8W876:P48740	NP_001027019.1:NP_001870.3:NP_624302.1:XP_006713764.1
Matrisome-associated	ECM Regulators	MASP1	mannan-binding lectin serine peptidase 1 (C4/C2 activating component of Ra-reactive factor)	6901	Homo sapiens	MC syndrome 1	CRARF|CRARF1|DKFZp686I01199|FLJ26383|MASP|MGC12628	6901	C9J1C7:C9JLU5:C9JMA2:F8W876:P48740	NP_001027019.1:NP_001870.3:NP_624302.1:XP_006713764.1
Matrisome-associated	ECM Regulators	MASP2	mannan-binding lectin serine peptidase 2	6902	Homo sapiens	immunodeficiency due to MASP-2 deficiency	MAP19|MASP-2|MASP1P1|sMAP	6902	O00187	NP_006601.2:NP_631947.1
Matrisome-associated	ECM Regulators	MMP1	matrix metallopeptidase 1 (interstitial collagenase)	7155	Homo sapiens	COPD, severe early onset	CLG|CLGN	7155	P03956	NP_002412.1
Matrisome-associated	ECM Regulators	MMP13	matrix metallopeptidase 13 (collagenase 3)	7159	Homo sapiens	metaphyseal anadysplasia	CLG3|MANDP1	7159	G5E971:P45452	NP_002418.1
Matrisome-associated	ECM Regulators	MMP13	matrix metallopeptidase 13 (collagenase 3)	7159	Homo sapiens	metaphyseal chondrodysplasia, Spahr type	CLG3|MANDP1	7159	G5E971:P45452	NP_002418.1
Matrisome-associated	ECM Regulators	MMP13	matrix metallopeptidase 13 (collagenase 3)	7159	Homo sapiens	spondyloepimetaphyseal dysplasia, Missouri type	CLG3|MANDP1	7159	G5E971:P45452	NP_002418.1
Matrisome-associated	ECM Regulators	MMP14	matrix metallopeptidase 14 (membrane-inserted)	7160	Homo sapiens	multicentric osteolysis-nodulosis-arthropathy spectrum	MMP-X1|MT1-MMP|MTMMP1	7160	F8VP90:F8W1B7:P50281	NP_004986.1
Matrisome-associated	ECM Regulators	MMP19	matrix metallopeptidase 19	7165	Homo sapiens	familial cavitary optic disc anomaly	MMP18|RASI-1	7165	A6ND33:B4DNP3:F8W1C3:Q99542	NP_001259030.1:NP_002420.1
Matrisome-associated	ECM Regulators	MMP2	matrix metallopeptidase 2 (gelatinase A, 72kDa gelatinase, 72kDa type IV collagenase)	7166	Homo sapiens	multicentric osteolysis-nodulosis-arthropathy spectrum	CLG4|CLG4A|MMP-II|MONA|TBE-1	7166	H3BR66:H3BS34:H3BV48:J3KRB7:P08253	NP_001121363.1:NP_004521.1
Matrisome-associated	ECM Regulators	MMP2	matrix metallopeptidase 2 (gelatinase A, 72kDa gelatinase, 72kDa type IV collagenase)	7166	Homo sapiens	multicentric osteolysis, nodulosis, and arthropathy	CLG4|CLG4A|MMP-II|MONA|TBE-1	7166	H3BR66:H3BS34:H3BV48:J3KRB7:P08253	NP_001121363.1:NP_004521.1
Matrisome-associated	ECM Regulators	MMP20	matrix metallopeptidase 20	7167	Homo sapiens	amelogenesis imperfecta hypomaturation type 2A2	AI2A2|MMP-20	7167	O60882	NP_004762.2
Matrisome-associated	ECM Regulators	MMP20	matrix metallopeptidase 20	7167	Homo sapiens	amelogenesis imperfecta type 2	AI2A2|MMP-20	7167	O60882	NP_004762.2
Matrisome-associated	ECM Regulators	MMP21	matrix metallopeptidase 21	14357	Homo sapiens	heterotaxy, visceral, 7, autosomal	-	14357	Q8N119	NP_671724.1
Matrisome-associated	ECM Regulators	MMP21	matrix metallopeptidase 21	14357	Homo sapiens	situs ambiguus	-	14357	Q8N119	NP_671724.1
Matrisome-associated	ECM Regulators	MMP21	matrix metallopeptidase 21	14357	Homo sapiens	situs inversus	-	14357	Q8N119	NP_671724.1
Matrisome-associated	ECM Regulators	MMP9	matrix metallopeptidase 9 (gelatinase B, 92kDa gelatinase, 92kDa type IV collagenase)	7176	Homo sapiens	metaphyseal anadysplasia	CLG4B|GELB|MANDP2|MMP-9	7176	P14780	NP_004985.2
Matrisome-associated	ECM Regulators	MMP9	matrix metallopeptidase 9 (gelatinase B, 92kDa gelatinase, 92kDa type IV collagenase)	7176	Homo sapiens	metaphyseal anadysplasia 2	CLG4B|GELB|MANDP2|MMP-9	7176	P14780	NP_004985.2
Matrisome-associated	ECM Regulators	NGLY1	N-glycanase 1	17646	Homo sapiens	NGLY1-deficiency	FLJ11005|FLJ12409|PNG1|PNGase	17646	C9JU75:H0Y2P2:Q96IV0:Q9NV10	NP_001138765.1:NP_001138766.1:NP_001138767.1:NP_060767.2
Matrisome-associated	ECM Regulators	P4HA2	prolyl 4-hydroxylase, alpha polypeptide II	8547	Homo sapiens	myopia 25, autosomal dominant	-	8547	A8MXE0:C9JCP0:C9JFJ1:C9JIG4:C9JN43:C9JX45:E7ENX0:E7EPI9:E7ERI1:O15460	NP_001017973.1:NP_001017974.1:NP_001136070.1:NP_001136071.1:NP_004190.1:XP_005272173.1:XP_005272174.1:XP_005272175.1:XP_005272176.1:XP_005272177.1:XP_006714791.1:XP_006714792.1:XP_006714793.1
Matrisome-associated	ECM Regulators	PLAT	plasminogen activator, tissue	9051	Homo sapiens	lethal hydranencephaly-diaphragmatic hernia syndrome	DKFZp686I03148|T-PA|TPA	9051	B4DN26:B4DNJ1:E5RGA1:E5RHG4:E7ESF4:H0YBH9:K4DI88:P00750	NP_000921.1:NP_127509.1
Matrisome-associated	ECM Regulators	PLAT	plasminogen activator, tissue	9051	Homo sapiens	THPH9	DKFZp686I03148|T-PA|TPA	9051	B4DN26:B4DNJ1:E5RGA1:E5RHG4:E7ESF4:H0YBH9:K4DI88:P00750	NP_000921.1:NP_127509.1
Matrisome-associated	ECM Regulators	PLAU	plasminogen activator, urokinase	9052	Homo sapiens	Quebec platelet disorder	ATF|UPA|URK|u-PA	9052	E7ESM2:E7ET40:P00749:S4R3G7	NP_001138503.1:NP_002649.1
Matrisome-associated	ECM Regulators	PLG	plasminogen	9071	Homo sapiens	hypoplasminogenemia	DKFZp779M0222	9071	A6PVI2:P00747:Q5TEH5	NP_000292.1:NP_001161810.1
Matrisome-associated	ECM Regulators	PLG	plasminogen	9071	Homo sapiens	ligneous conjunctivitis	DKFZp779M0222	9071	A6PVI2:P00747:Q5TEH5	NP_000292.1:NP_001161810.1
Matrisome-associated	ECM Regulators	PLOD1	procollagen-lysine 1, 2-oxoglutarate 5-dioxygenase 1	9081	Homo sapiens	Ehlers-Danlos syndrome, kyphoscoliotic type	FLJ42041|LH|LH1|LLH|PLOD	9081	B4DR87:Q02809:Q5JXB7:Q5JXB8:Q5JXB9	NP_000293.2
Matrisome-associated	ECM Regulators	PLOD2	procollagen-lysine, 2-oxoglutarate 5-dioxygenase 2	9082	Homo sapiens	Bruck syndrome	LH2|TLH	9082	B3KWS3:C9JXZ0:E7ETU9:F8WEW3:O00469	NP_000926.2:NP_891988.1
Matrisome-associated	ECM Regulators	PLOD2	procollagen-lysine, 2-oxoglutarate 5-dioxygenase 2	9082	Homo sapiens	Bruck syndrome 2	LH2|TLH	9082	B3KWS3:C9JXZ0:E7ETU9:F8WEW3:O00469	NP_000926.2:NP_891988.1
Matrisome-associated	ECM Regulators	PLOD3	procollagen-lysine, 2-oxoglutarate 5-dioxygenase 3	9083	Homo sapiens	connective tissue disorder due to lysyl hydroxylase-3 deficiency	LH3	9083	C9JIX5:C9JU11:H7C0B8:H7C2A8:H7C2S8:H7C2V1:O60568	NP_001075.1
Matrisome-associated	ECM Regulators	PRSS1	protease, serine, 1 (trypsin 1)	9475	Homo sapiens	hereditary chronic pancreatitis	TRP1|TRY1|TRY4|TRYP1	9475	E7EQ64:H0Y8D1:P07477	NP_002760.1
Matrisome-associated	ECM Regulators	PRSS1	protease, serine, 1 (trypsin 1)	9475	Homo sapiens	recurrent acute pancreatitis	TRP1|TRY1|TRY4|TRYP1	9475	E7EQ64:H0Y8D1:P07477	NP_002760.1
Matrisome-associated	ECM Regulators	PRSS1	protease, serine, 1 (trypsin 1)	9475	Homo sapiens	trypsinogen deficiency	TRP1|TRY1|TRY4|TRYP1	9475	E7EQ64:H0Y8D1:P07477	NP_002760.1
Matrisome-associated	ECM Regulators	PRSS12	protease, serine, 12 (neurotrypsin, motopsin)	9477	Homo sapiens	autosomal recessive non-syndromic intellectual disability	BSSP-3|BSSP3|MGC12722|MRT1	9477	P56730	NP_003610.2
Matrisome-associated	ECM Regulators	PRSS12	protease, serine, 12 (neurotrypsin, motopsin)	9477	Homo sapiens	intellectual disability, autosomal recessive 1	BSSP-3|BSSP3|MGC12722|MRT1	9477	P56730	NP_003610.2
Matrisome-associated	ECM Regulators	SERPINA1	serpin peptidase inhibitor, clade A (alpha-1 antiproteinase, antitrypsin), member 1	8941	Homo sapiens	alpha 1-antitrypsin deficiency	A1A|A1AT|AAT|MGC23330|MGC9222|PI|PI1|PRO2275	8941	G3V2B9:G3V387:G3V4I7:G3V544:G3V5R8:P01009	NP_000286.3:NP_001002235.1:NP_001002236.1:NP_001121172.1:NP_001121173.1:NP_001121174.1:NP_001121175.1:NP_001121176.1:NP_001121177.1:NP_001121178.1:NP_001121179.1
Matrisome-associated	ECM Regulators	SERPINA1	serpin peptidase inhibitor, clade A (alpha-1 antiproteinase, antitrypsin), member 1	8941	Homo sapiens	hemorrhagic disease due to alpha-1-antitrypsin Pittsburgh mutation	A1A|A1AT|AAT|MGC23330|MGC9222|PI|PI1|PRO2275	8941	G3V2B9:G3V387:G3V4I7:G3V544:G3V5R8:P01009	NP_000286.3:NP_001002235.1:NP_001002236.1:NP_001121172.1:NP_001121173.1:NP_001121174.1:NP_001121175.1:NP_001121176.1:NP_001121177.1:NP_001121178.1:NP_001121179.1
Matrisome-associated	ECM Regulators	SERPINA6	serpin peptidase inhibitor, clade A (alpha-1 antiproteinase, antitrypsin), member 6	1540	Homo sapiens	corticosteroid-binding globulin deficiency	CBG	1540	G3V350:G3V4V7:P08185	NP_001747.2
Matrisome-associated	ECM Regulators	SERPINB6	serpin peptidase inhibitor, clade B (ovalbumin), member 6	8950	Homo sapiens	autosomal recessive nonsyndromic deafness	CAP|DKFZp686I04222|MGC111370|MSTP057|PI6|PTI|SPI3	8950	P35237	NP_001182220.2:NP_001258751.1:NP_001258752.1:NP_001258753.1:NP_001258754.1:NP_004559.4
Matrisome-associated	ECM Regulators	SERPINB7	serpin peptidase inhibitor, clade B (ovalbumin), member 7	13902	Homo sapiens	palmoplantar keratoderma, Nagashima type	DKFZp686D06190|MEGSIN|MGC120014|MGC120015	13902	C9JA68:C9JM00:C9JZR8:O75635	NP_001035237.1:NP_001248759.1:NP_001248760.1:NP_003775.1:XP_006722625.1
Matrisome-associated	ECM Regulators	SERPINB8	serpin peptidase inhibitor, clade B (ovalbumin), member 8	8952	Homo sapiens	exfoliative ichthyosis	CAP2|PI8	8952	C9JTJ8:C9JVA8:H7BXK7:P50452	NP_001027018.1:NP_001263419.1:NP_002631.3:NP_942130.1
Matrisome-associated	ECM Regulators	SERPINB8	serpin peptidase inhibitor, clade B (ovalbumin), member 8	8952	Homo sapiens	peeling skin syndrome 5	CAP2|PI8	8952	C9JTJ8:C9JVA8:H7BXK7:P50452	NP_001027018.1:NP_001263419.1:NP_002631.3:NP_942130.1
Matrisome-associated	ECM Regulators	SERPINC1	serpin peptidase inhibitor, clade C (antithrombin), member 1	775	Homo sapiens	antithrombin III deficiency	AT3|ATIII|MGC22579	775	P01008	NP_000479.1
Matrisome-associated	ECM Regulators	SERPIND1	serpin peptidase inhibitor, clade D (heparin cofactor), member 1	4838	Homo sapiens	heparin cofactor 2 deficiency	D22S673|HC2|HCF2|HCII|HLS2|LS2	4838	P05546	NP_000176.2:XP_005261654.1
Matrisome-associated	ECM Regulators	SERPINE1	serpin peptidase inhibitor, clade E (nexin, plasminogen activator inhibitor type 1), member 1	8583	Homo sapiens	congenital plasminogen activator inhibitor type 1 deficiency	PAI|PAI-1|PAI1|PLANH1	8583	P05121	NP_000593.1
Matrisome-associated	ECM Regulators	SERPINF1	serpin peptidase inhibitor, clade F (alpha-2 antiplasmin, pigment epithelium derived factor), member 1	8824	Homo sapiens	osteogenesis imperfecta type 3	EPC-1|PEDF|PIG35	8824	I3L107:I3L1U4:I3L2R7:I3L3Z3:I3L425:I3L4F9:I3L4N7:I3L4Z0:P36955	NP_002606.3
Matrisome-associated	ECM Regulators	SERPINF1	serpin peptidase inhibitor, clade F (alpha-2 antiplasmin, pigment epithelium derived factor), member 1	8824	Homo sapiens	osteogenesis imperfecta type 4	EPC-1|PEDF|PIG35	8824	I3L107:I3L1U4:I3L2R7:I3L3Z3:I3L425:I3L4F9:I3L4N7:I3L4Z0:P36955	NP_002606.3
Matrisome-associated	ECM Regulators	SERPINF1	serpin peptidase inhibitor, clade F (alpha-2 antiplasmin, pigment epithelium derived factor), member 1	8824	Homo sapiens	osteogenesis imperfecta type 6	EPC-1|PEDF|PIG35	8824	I3L107:I3L1U4:I3L2R7:I3L3Z3:I3L425:I3L4F9:I3L4N7:I3L4Z0:P36955	NP_002606.3
Matrisome-associated	ECM Regulators	SERPINF2	serpin peptidase inhibitor, clade F (alpha-2 antiplasmin, pigment epithelium derived factor), member 2	9075	Homo sapiens	alpha-2-plasmin inhibitor deficiency	A2AP|AAP|ALPHA-2-PI|API|PLI	9075	C9JMH6:C9JPV4:P08697	NP_000925.2:NP_001159392.1:NP_001159393.1:XP_005256758.1
Matrisome-associated	ECM Regulators	SERPING1	serpin peptidase inhibitor, clade G (C1 inhibitor), member 1	1228	Homo sapiens	angioedema, hereditary, type 1/2	C1IN|C1INH|C1NH|HAE1|HAE2	1228	B4E1F0:B4E1H2:B5MCB9:C9JZJ9:E9PGN7:E9PK97:H0YCA1:H9KV48:P05155	NP_000053.2:NP_001027466.1
Matrisome-associated	ECM Regulators	SERPING1	serpin peptidase inhibitor, clade G (C1 inhibitor), member 1	1228	Homo sapiens	C1 inhibitor deficiency	C1IN|C1INH|C1NH|HAE1|HAE2	1228	B4E1F0:B4E1H2:B5MCB9:C9JZJ9:E9PGN7:E9PK97:H0YCA1:H9KV48:P05155	NP_000053.2:NP_001027466.1
Matrisome-associated	ECM Regulators	SERPING1	serpin peptidase inhibitor, clade G (C1 inhibitor), member 1	1228	Homo sapiens	hereditary angioedema type 1	C1IN|C1INH|C1NH|HAE1|HAE2	1228	B4E1F0:B4E1H2:B5MCB9:C9JZJ9:E9PGN7:E9PK97:H0YCA1:H9KV48:P05155	NP_000053.2:NP_001027466.1
Matrisome-associated	ECM Regulators	SERPING1	serpin peptidase inhibitor, clade G (C1 inhibitor), member 1	1228	Homo sapiens	hereditary angioedema type 2	C1IN|C1INH|C1NH|HAE1|HAE2	1228	B4E1F0:B4E1H2:B5MCB9:C9JZJ9:E9PGN7:E9PK97:H0YCA1:H9KV48:P05155	NP_000053.2:NP_001027466.1
Matrisome-associated	ECM Regulators	SERPINH1	serpin peptidase inhibitor, clade H (heat shock protein 47), member 1, (collagen binding protein 1)	1546	Homo sapiens	osteogenesis imperfecta type 10	AsTP3|CBP1|CBP2|HSP47|PIG14|PPROM|RA-A47|SERPINH2|	1546	E9PIG2:E9PJH8:E9PK86:E9PKH2:E9PLA6:E9PMI5:E9PNX1:E9PPV6:E9PQ34:E9PR70:E9PRS3:H0YEP8:P50454	NP_001193943.1:NP_001226.2:XP_006718790.1:XP_006718791.1:XP_006718792.1
Matrisome-associated	ECM Regulators	SERPINH1	serpin peptidase inhibitor, clade H (heat shock protein 47), member 1, (collagen binding protein 1)	1546	Homo sapiens	osteogenesis imperfecta type 3	AsTP3|CBP1|CBP2|HSP47|PIG14|PPROM|RA-A47|SERPINH2|	1546	E9PIG2:E9PJH8:E9PK86:E9PKH2:E9PLA6:E9PMI5:E9PNX1:E9PPV6:E9PQ34:E9PR70:E9PRS3:H0YEP8:P50454	NP_001193943.1:NP_001226.2:XP_006718790.1:XP_006718791.1:XP_006718792.1
Matrisome-associated	ECM Regulators	SERPINI1	serpin peptidase inhibitor, clade I (neuroserpin), member 1	8943	Homo sapiens	familial encephalopathy with neuroserpin inclusion bodies	DKFZp781N13156|PI12|neuroserpin	8943	C9JDY5:C9JQU8:H7C5T9:Q99574	NP_001116224.1:NP_005016.1:XP_006713720.1
Matrisome-associated	ECM Regulators	ST14	suppression of tumorigenicity 14 (colon carcinoma)	11344	Homo sapiens	autosomal recessive congenital ichthyosis 11	HAI|MT-SP1|MTSP1|PRSS14|SNC19|TADG15	11344	Q9Y5Y6	NP_068813.1
Matrisome-associated	ECM Regulators	TGM1	transglutaminase 1 (K polypeptide epidermal type I, protein-glutamine-gamma-glutamyltransferase)	11777	Homo sapiens	acral self-healing collodion baby	ICR2|KTG|LI|LI1|TGASE|TGK	11777	B4DWR7:H0YKI6:H0YLJ6:H0YLT9:H0YMQ8:H0YN27:H0YNM4:P22735	NP_000350.1
Matrisome-associated	ECM Regulators	TGM1	transglutaminase 1 (K polypeptide epidermal type I, protein-glutamine-gamma-glutamyltransferase)	11777	Homo sapiens	autosomal recessive congenital ichthyosis 1	ICR2|KTG|LI|LI1|TGASE|TGK	11777	B4DWR7:H0YKI6:H0YLJ6:H0YLT9:H0YMQ8:H0YN27:H0YNM4:P22735	NP_000350.1
Matrisome-associated	ECM Regulators	TGM1	transglutaminase 1 (K polypeptide epidermal type I, protein-glutamine-gamma-glutamyltransferase)	11777	Homo sapiens	bathing suit ichthyosis	ICR2|KTG|LI|LI1|TGASE|TGK	11777	B4DWR7:H0YKI6:H0YLJ6:H0YLT9:H0YMQ8:H0YN27:H0YNM4:P22735	NP_000350.1
Matrisome-associated	ECM Regulators	TGM1	transglutaminase 1 (K polypeptide epidermal type I, protein-glutamine-gamma-glutamyltransferase)	11777	Homo sapiens	congenital non-bullous ichthyosiform erythroderma	ICR2|KTG|LI|LI1|TGASE|TGK	11777	B4DWR7:H0YKI6:H0YLJ6:H0YLT9:H0YMQ8:H0YN27:H0YNM4:P22735	NP_000350.1
Matrisome-associated	ECM Regulators	TGM1	transglutaminase 1 (K polypeptide epidermal type I, protein-glutamine-gamma-glutamyltransferase)	11777	Homo sapiens	lamellar ichthyosis	ICR2|KTG|LI|LI1|TGASE|TGK	11777	B4DWR7:H0YKI6:H0YLJ6:H0YLT9:H0YMQ8:H0YN27:H0YNM4:P22735	NP_000350.1
Matrisome-associated	ECM Regulators	TGM1	transglutaminase 1 (K polypeptide epidermal type I, protein-glutamine-gamma-glutamyltransferase)	11777	Homo sapiens	self-healing collodion baby	ICR2|KTG|LI|LI1|TGASE|TGK	11777	B4DWR7:H0YKI6:H0YLJ6:H0YLT9:H0YMQ8:H0YN27:H0YNM4:P22735	NP_000350.1
Matrisome-associated	ECM Regulators	TGM3	transglutaminase 3 (E polypeptide, protein-glutamine-gamma-glutamyltransferase)	11779	Homo sapiens	uncombable hair syndrome	MGC126249|MGC126250|TGE	11779	Q08188	NP_003236.3
Matrisome-associated	ECM Regulators	TGM5	transglutaminase 5	11781	Homo sapiens	acral peeling skin syndrome	MGC141907|TGASE5|TGASEX|TGM6|TGMX|TGX	11781	O43548	NP_004236.1:NP_963925.2
Matrisome-associated	ECM Regulators	TGM6	transglutaminase 6	16255	Homo sapiens	inherited acute myeloid leukemia	TGM3L|TGY|dJ734P14.3	16255	O95932	NP_001241663.1:NP_945345.2
Matrisome-associated	ECM Regulators	TGM6	transglutaminase 6	16255	Homo sapiens	spinocerebellar ataxia type 35	TGM3L|TGY|dJ734P14.3	16255	O95932	NP_001241663.1:NP_945345.2
Matrisome-associated	ECM Regulators	TIMP3	TIMP metallopeptidase inhibitor 3	11822	Homo sapiens	Sorsby's fundus dystrophy	HSMRK222|K222|K222TA2|SFD	11822	P35625	NP_000353.1
Matrisome-associated	ECM Regulators	TLL1	tolloid-like 1	11843	Homo sapiens	atrial heart septal defect 6	ASD6|TLL	11843	D6RAK5:D6RBI6:D6RCE0:E9PD25:O43897	NP_001191689.1:NP_036596.3
Matrisome-associated	ECM Regulators	TLL1	tolloid-like 1	11843	Homo sapiens	atrial septal defect, ostium primum type	ASD6|TLL	11843	D6RAK5:D6RBI6:D6RCE0:E9PD25:O43897	NP_001191689.1:NP_036596.3
Matrisome-associated	ECM Regulators	TLL1	tolloid-like 1	11843	Homo sapiens	atrial septal defect, ostium secundum type	ASD6|TLL	11843	D6RAK5:D6RBI6:D6RCE0:E9PD25:O43897	NP_001191689.1:NP_036596.3
Matrisome-associated	ECM Regulators	TMPRSS15	protease, serine, 7 (enterokinase)	9490	Homo sapiens	congenital enteropathy due to enteropeptidase deficiency	ENTK|MGC133046|TMPRSS15|PRSS7	9490	E9PG70:P98073	NP_002763.2
Matrisome-associated	ECM-affiliated Proteins	ANXA11	annexin A11	535	Homo sapiens	amyotrophic lateral sclerosis	ANX11|CAP50	535	H0Y6E1:P50995:Q5T0G7:Q5T0G9	NP_001148.1:NP_001265336.1:NP_001265337.1:NP_001265338.1:NP_665875.1:NP_665876.1
Matrisome-associated	ECM-affiliated Proteins	ANXA11	annexin A11	535	Homo sapiens	amyotrophic lateral sclerosis type 23	ANX11|CAP50	535	H0Y6E1:P50995:Q5T0G7:Q5T0G9	NP_001148.1:NP_001265336.1:NP_001265337.1:NP_001265338.1:NP_665875.1:NP_665876.1
Matrisome-associated	ECM-affiliated Proteins	C1QA	complement component 1, q subcomponent, A chain	1241	Homo sapiens	C1Q deficiency	-	1241	P02745:X6RLJ0	NP_057075.1
Matrisome-associated	ECM-affiliated Proteins	C1QA	complement component 1, q subcomponent, A chain	1241	Homo sapiens	immunodeficiency due to a classical component pathway complement deficiency	-	1241	P02745:X6RLJ0	NP_057075.1
Matrisome-associated	ECM-affiliated Proteins	C1QA	complement component 1, q subcomponent, A chain	1241	Homo sapiens	pediatric systemic lupus erythematosus	-	1241	P02745:X6RLJ0	NP_057075.1
Matrisome-associated	ECM-affiliated Proteins	C1QB	complement component 1, q subcomponent, B chain	1242	Homo sapiens	C1Q deficiency	-	1242	D6R934:D6RGJ1:P02746	NP_000482.3:XP_005246039.1
Matrisome-associated	ECM-affiliated Proteins	C1QB	complement component 1, q subcomponent, B chain	1242	Homo sapiens	immunodeficiency due to a classical component pathway complement deficiency	-	1242	D6R934:D6RGJ1:P02746	NP_000482.3:XP_005246039.1
Matrisome-associated	ECM-affiliated Proteins	C1QC	complement component 1, q subcomponent, C chain	1245	Homo sapiens	C1Q deficiency	C1Q-C|C1QG|FLJ27103	1245	P02747	NP_001107573.1:NP_758957.2
Matrisome-associated	ECM-affiliated Proteins	C1QC	complement component 1, q subcomponent, C chain	1245	Homo sapiens	immunodeficiency due to a classical component pathway complement deficiency	C1Q-C|C1QG|FLJ27103	1245	P02747	NP_001107573.1:NP_758957.2
Matrisome-associated	ECM-affiliated Proteins	C1QTNF5	C1q and tumor necrosis factor related protein 5	14344	Homo sapiens	late-onset retinal degeneration	CTRP5|DKFZp586B0621|FLJ30570|LORD	14344	Q9BXJ0	NP_001265360.1:NP_056460.1
Matrisome-associated	ECM-affiliated Proteins	CLEC7A	C-type lectin domain family 7, member A	14558	Homo sapiens	candidiasis, familial, 4	BGR|CANDF4|CLECSF12|DECTIN1	14558	Q68D78:Q9BXN2	NP_072092.2:NP_922938.1:NP_922939.1:NP_922940.1:NP_922941.1:NP_072092.2:NP_922938.1:NP_922939.1:NP_922940.1:NP_922941.1:NP_922945.1:XP_005253524.1:XP_005253525.1:XP_006719198.1:XP_006719199.1
Matrisome-associated	ECM-affiliated Proteins	CLEC7A	C-type lectin domain family 7, member A	14558	Homo sapiens	chronic mucocutaneous candidiasis (disease)	BGR|CANDF4|CLECSF12|DECTIN1	14558	Q68D78:Q9BXN2	NP_072092.2:NP_922938.1:NP_922939.1:NP_922940.1:NP_922941.1:NP_072092.2:NP_922938.1:NP_922939.1:NP_922940.1:NP_922941.1:NP_922945.1:XP_005253524.1:XP_005253525.1:XP_006719198.1:XP_006719199.1
Matrisome-associated	ECM-affiliated Proteins	COLEC10	collectin sub-family member 10 (C-type lectin)	2220	Homo sapiens	MC syndrome	CLL1|MGC118794|MGC118795	2220	Q9Y6Z7	NP_006429.2
Matrisome-associated	ECM-affiliated Proteins	COLEC10	collectin sub-family member 10 (C-type lectin)	2220	Homo sapiens	MC syndrome 3	CLL1|MGC118794|MGC118795	2220	Q9Y6Z7	NP_006429.2
Matrisome-associated	ECM-affiliated Proteins	COLEC11	collectin sub-family member 11	17213	Homo sapiens	MC syndrome	CL-K1-I|CL-K1-II|CL-K1-IIa|CL-K1-IIb|CLK1|DKFZp686	17213	C9JWT5:F8WB29:Q9BWP8	NP_001242911.1:NP_001242912.1:NP_001242913.1:NP_001242914.1:NP_001242915.1:NP_001242916.1:NP_001242917.1:NP_001242918.1:NP_076932.1:NP_954705.1
Matrisome-associated	ECM-affiliated Proteins	COLEC11	collectin sub-family member 11	17213	Homo sapiens	MC syndrome 2	CL-K1-I|CL-K1-II|CL-K1-IIa|CL-K1-IIb|CLK1|DKFZp686	17213	C9JWT5:F8WB29:Q9BWP8	NP_001242911.1:NP_001242912.1:NP_001242913.1:NP_001242914.1:NP_001242915.1:NP_001242916.1:NP_001242917.1:NP_001242918.1:NP_076932.1:NP_954705.1
Matrisome-associated	ECM-affiliated Proteins	FCN3	ficolin (collagen/fibrinogen domain containing) 3 (Hakata antigen)	3625	Homo sapiens	immunodeficiency due to ficolin3 deficiency	FCNH|HAKA1|MGC22543	3625	O75636:Q5SSB9	NP_003656.2:NP_775628.1
Matrisome-associated	ECM-affiliated Proteins	FREM1	FRAS1 related extracellular matrix 1	23399	Homo sapiens	BNAR syndrome	BNAR|C9orf143|C9orf145|C9orf154|FLJ25461|QBRICK|RP	23399	C9JT55:F8WE85:Q5H8C1	NP_001171175.1:NP_659403.4:XP_005251439.1:XP_005251441.1:XP_006716786.1:XP_006716792.1
Matrisome-associated	ECM-affiliated Proteins	FREM1	FRAS1 related extracellular matrix 1	23399	Homo sapiens	isolated trigonocephaly	BNAR|C9orf143|C9orf145|C9orf154|FLJ25461|QBRICK|RP	23399	C9JT55:F8WE85:Q5H8C1	NP_001171175.1:NP_659403.4:XP_005251439.1:XP_005251441.1:XP_006716786.1:XP_006716792.1
Matrisome-associated	ECM-affiliated Proteins	FREM1	FRAS1 related extracellular matrix 1	23399	Homo sapiens	oculotrichoanal syndrome	BNAR|C9orf143|C9orf145|C9orf154|FLJ25461|QBRICK|RP	23399	C9JT55:F8WE85:Q5H8C1	NP_001171175.1:NP_659403.4:XP_005251439.1:XP_005251441.1:XP_006716786.1:XP_006716792.1
Matrisome-associated	ECM-affiliated Proteins	FREM1	FRAS1 related extracellular matrix 1	23399	Homo sapiens	renal agenesis, unilateral	BNAR|C9orf143|C9orf145|C9orf154|FLJ25461|QBRICK|RP	23399	C9JT55:F8WE85:Q5H8C1	NP_001171175.1:NP_659403.4:XP_005251439.1:XP_005251441.1:XP_006716786.1:XP_006716792.1
Matrisome-associated	ECM-affiliated Proteins	FREM1	FRAS1 related extracellular matrix 1	23399	Homo sapiens	trigonocephaly 2	BNAR|C9orf143|C9orf145|C9orf154|FLJ25461|QBRICK|RP	23399	C9JT55:F8WE85:Q5H8C1	NP_001171175.1:NP_659403.4:XP_005251439.1:XP_005251441.1:XP_006716786.1:XP_006716792.1
Matrisome-associated	ECM-affiliated Proteins	FREM2	FRAS1 related extracellular matrix protein 2	25396	Homo sapiens	complete cryptophthalmia	DKFZp686J0811|DKFZp781I048|KIAA1074	25396	Q5SZK8	NP_997244.4
Matrisome-associated	ECM-affiliated Proteins	FREM2	FRAS1 related extracellular matrix protein 2	25396	Homo sapiens	Fraser syndrome	DKFZp686J0811|DKFZp781I048|KIAA1074	25396	Q5SZK8	NP_997244.4
Matrisome-associated	ECM-affiliated Proteins	FREM2	FRAS1 related extracellular matrix protein 2	25396	Homo sapiens	Fraser syndrome 2	DKFZp686J0811|DKFZp781I048|KIAA1074	25396	Q5SZK8	NP_997244.4
Matrisome-associated	ECM-affiliated Proteins	FREM2	FRAS1 related extracellular matrix protein 2	25396	Homo sapiens	isolated cryptophthalmia	DKFZp686J0811|DKFZp781I048|KIAA1074	25396	Q5SZK8	NP_997244.4
Matrisome-associated	ECM-affiliated Proteins	FREM2	FRAS1 related extracellular matrix protein 2	25396	Homo sapiens	renal agenesis, unilateral	DKFZp686J0811|DKFZp781I048|KIAA1074	25396	Q5SZK8	NP_997244.4
Matrisome-associated	ECM-affiliated Proteins	GPC3	glypican 3	4451	Homo sapiens	Simpson-Golabi-Behmel syndrome	DGSX|GTR2-2|MXR7|OCI-5|SDYS|SGB|SGBS|SGBS1	4451	H0Y3U6:P51654	NP_001158089.1:NP_001158091.1:NP_004475.1
Matrisome-associated	ECM-affiliated Proteins	GPC3	glypican 3	4451	Homo sapiens	Simpson-Golabi-Behmel syndrome type 1	DGSX|GTR2-2|MXR7|OCI-5|SDYS|SGB|SGBS|SGBS1	4451	H0Y3U6:P51654	NP_001158089.1:NP_001158091.1:NP_004475.1
Matrisome-associated	ECM-affiliated Proteins	GPC3	glypican 3	4451	Homo sapiens	Wilms tumor type 1	DGSX|GTR2-2|MXR7|OCI-5|SDYS|SGB|SGBS|SGBS1	4451	H0Y3U6:P51654	NP_001158089.1:NP_001158091.1:NP_004475.1
Matrisome-associated	ECM-affiliated Proteins	GPC4	glypican 4	4452	Homo sapiens	Keipert syndrome	K-glypican	4452	B4E2C0:O75487	NP_001439.2
Matrisome-associated	ECM-affiliated Proteins	GPC6	glypican 6	4454	Homo sapiens	autosomal recessive omodysplasia	MGC126288|OMIMD1	4454	Q9Y625	NP_005699.1
Matrisome-associated	ECM-affiliated Proteins	GREM1	gremlin 1, cysteine knot superfamily, homolog (Xenopus laevis)	2001	Homo sapiens	hereditary mixed polyposis syndrome	CKTSF1B1|DAND2|DRM|GREMLIN|IHG-2|MGC126660|PIG2	2001	H0YLY2:O60565	NP_001178252.1:NP_037504.1
Matrisome-associated	ECM-affiliated Proteins	LMAN1	lectin, mannose-binding, 1	6631	Homo sapiens	combined deficiency of factor V and factor VIII	ERGIC-53|ERGIC53|F5F8D|FMFD1|MCFD1|MR60|gp58	6631	P49257	NP_005561.1
Matrisome-associated	ECM-affiliated Proteins	LMAN1	lectin, mannose-binding, 1	6631	Homo sapiens	factor V and factor VIII, combined deficiency of, type 1	ERGIC-53|ERGIC53|F5F8D|FMFD1|MCFD1|MR60|gp58	6631	P49257	NP_005561.1
Matrisome-associated	ECM-affiliated Proteins	MUC1	mucin 1, cell surface associated	7508	Homo sapiens	autosomal dominant medullary cystic kidney disease without hyperuricemia	CD227|EMA|H23AG|KL-6|MAM6|PEM|PEMT|PUM	7508	B1AVQ5:B1AVQ7:P15941	NP_001018016.1:NP_001018017.1:NP_001037855.1:NP_001037856.1:NP_001037857.1:NP_001037858.1:NP_001191214.1:NP_001191215.1:NP_001191216.1:NP_001191217.1:NP_001191218.1:NP_001191219.1:NP_001191220.1:NP_001191221.1:NP_001191222.1:NP_001191223.1:NP_001191224.1:NP_001191225.1:NP_001191226.1:NP_002447.4:NP_001191214.1
Matrisome-associated	ECM-affiliated Proteins	MUC1	mucin 1, cell surface associated	7508	Homo sapiens	medullary cystic kidney disease 1	CD227|EMA|H23AG|KL-6|MAM6|PEM|PEMT|PUM	7508	B1AVQ5:B1AVQ7:P15941	NP_001018016.1:NP_001018017.1:NP_001037855.1:NP_001037856.1:NP_001037857.1:NP_001037858.1:NP_001191214.1:NP_001191215.1:NP_001191216.1:NP_001191217.1:NP_001191218.1:NP_001191219.1:NP_001191220.1:NP_001191221.1:NP_001191222.1:NP_001191223.1:NP_001191224.1:NP_001191225.1:NP_001191226.1:NP_002447.4:NP_001191214.1
Matrisome-associated	ECM-affiliated Proteins	PLXND1	plexin D1	9107	Homo sapiens	Mobius syndrome	KIAA0620|MGC75353|PLEXD1	9107	D6RH25:H0Y9D1:H0YA64:H0YAB2:H0YAM9:Q9Y4D7	NP_055918.2
Matrisome-associated	ECM-affiliated Proteins	PLXND1	plexin D1	9107	Homo sapiens	persistent truncus arteriosus	KIAA0620|MGC75353|PLEXD1	9107	D6RH25:H0Y9D1:H0YA64:H0YAB2:H0YAM9:Q9Y4D7	NP_055918.2
Matrisome-associated	ECM-affiliated Proteins	SEMA3A	sema domain, immunoglobulin domain (Ig), short basic domain, secreted, (semaphorin) 3A	10723	Homo sapiens	Kallmann syndrome	Hsema-I|Hsema-III|MGC133243|SEMA1|SEMAD|SEMAIII|SE	10723	C9J9C4:C9JD25:Q14563	NP_006071.1:XP_005250167.1:XP_005250168.1:XP_006715901.1:XP_006715902.1
Matrisome-associated	ECM-affiliated Proteins	SEMA4A	sema domain, immunoglobulin domain (Ig), transmembrane domain (TM) and short cytoplasmic domain, (semaphorin) 4A	10729	Homo sapiens	cone-rod dystrophy	CORD10|FLJ12287|RP35|SEMAB|SEMB	10729	Q5TCI4:Q5TCI6:Q5TCJ5:Q5TCJ7:Q9H3S1	NP_001180229.1:NP_001180230.1:NP_001180231.1:NP_071762.2
Matrisome-associated	ECM-affiliated Proteins	SEMA4A	sema domain, immunoglobulin domain (Ig), transmembrane domain (TM) and short cytoplasmic domain, (semaphorin) 4A	10729	Homo sapiens	cone-rod dystrophy 10	CORD10|FLJ12287|RP35|SEMAB|SEMB	10729	Q5TCI4:Q5TCI6:Q5TCJ5:Q5TCJ7:Q9H3S1	NP_001180229.1:NP_001180230.1:NP_001180231.1:NP_071762.2
Matrisome-associated	ECM-affiliated Proteins	SEMA4A	sema domain, immunoglobulin domain (Ig), transmembrane domain (TM) and short cytoplasmic domain, (semaphorin) 4A	10729	Homo sapiens	familial colorectal cancer type X	CORD10|FLJ12287|RP35|SEMAB|SEMB	10729	Q5TCI4:Q5TCI6:Q5TCJ5:Q5TCJ7:Q9H3S1	NP_001180229.1:NP_001180230.1:NP_001180231.1:NP_071762.2
Matrisome-associated	ECM-affiliated Proteins	SEMA4A	sema domain, immunoglobulin domain (Ig), transmembrane domain (TM) and short cytoplasmic domain, (semaphorin) 4A	10729	Homo sapiens	retinitis pigmentosa	CORD10|FLJ12287|RP35|SEMAB|SEMB	10729	Q5TCI4:Q5TCI6:Q5TCJ5:Q5TCJ7:Q9H3S1	NP_001180229.1:NP_001180230.1:NP_001180231.1:NP_071762.2
Matrisome-associated	ECM-affiliated Proteins	SEMA4A	sema domain, immunoglobulin domain (Ig), transmembrane domain (TM) and short cytoplasmic domain, (semaphorin) 4A	10729	Homo sapiens	retinitis pigmentosa 35	CORD10|FLJ12287|RP35|SEMAB|SEMB	10729	Q5TCI4:Q5TCI6:Q5TCJ5:Q5TCJ7:Q9H3S1	NP_001180229.1:NP_001180230.1:NP_001180231.1:NP_071762.2
Matrisome-associated	ECM-affiliated Proteins	SFTPA2	surfactant protein A2	10799	Homo sapiens	idiopathic pulmonary fibrosis	COLEC5|FLJ50594|FLJ50597|FLJ51953|FLJ79091|FLJ9367	10799	Q8IWL1:R4GMN3:X6REF7	NP_001092138.1:XP_005270188.1:XP_005270189.1
Matrisome-associated	ECM-affiliated Proteins	SFTPB	surfactant protein B	10801	Homo sapiens	neonatal acute respiratory distress due to SP-B deficiency	PSP-B|SFTB3|SFTP3|SMDP1|SP-B	10801	D6W5L6:H0Y7V6:P07988:U3KQT2	NP_000533.3:NP_942140.2:NP_000533.3:NP_942140.2:XP_005264544.1
Matrisome-associated	ECM-affiliated Proteins	SFTPC	surfactant protein C	10802	Homo sapiens	chronic respiratory distress with surfactant metabolism deficiency	PSP-C|SFTP2|SMDP2|SP-C	10802	C9JYF6:E5RG20:E5RG93:E5RHW5:E5RI64:E5RI92:P11686	NP_001165828.1:NP_001165881.1:NP_003009.2
Matrisome-associated	ECM-affiliated Proteins	SFTPC	surfactant protein C	10802	Homo sapiens	interstitial lung disease due to SP-c deficiency	PSP-C|SFTP2|SMDP2|SP-C	10802	C9JYF6:E5RG20:E5RG93:E5RHW5:E5RI64:E5RI92:P11686	NP_001165828.1:NP_001165881.1:NP_003009.2
Matrisome-associated	ECM-affiliated Proteins	SFTPC	surfactant protein C	10802	Homo sapiens	surfactant metabolism dysfunction, pulmonary, 2	PSP-C|SFTP2|SMDP2|SP-C	10802	C9JYF6:E5RG20:E5RG93:E5RHW5:E5RI64:E5RI92:P11686	NP_001165828.1:NP_001165881.1:NP_003009.2
Matrisome-associated	Secreted Factors	AMH	anti-Mullerian hormone	464	Homo sapiens	persistent Mullerian duct syndrome	MIF|MIS	464	K7EJU5:P03971	NP_000470.2
Matrisome-associated	Secreted Factors	ANGPTL3	angiopoietin-like 3	491	Homo sapiens	familial hypobetalipoproteinemia 2	ANGPT5	491	Q9Y5C1	NP_055310.1
Matrisome-associated	Secreted Factors	ANGPTL6	angiopoietin-like 6	23140	Homo sapiens	intracranial berry aneurysm	AGF|ARP5	23140	K7EKF6:Q8NI99	NP_114123.2
Matrisome-associated	Secreted Factors	BMP15	bone morphogenetic protein 15	1068	Homo sapiens	ovarian dysgenesis 2	GDF9B|ODG2|POF4	1068	O95972	NP_005439.2
Matrisome-associated	Secreted Factors	BMP15	bone morphogenetic protein 15	1068	Homo sapiens	XX gonadal dysgenesis	GDF9B|ODG2|POF4	1068	O95972	NP_005439.2
Matrisome-associated	Secreted Factors	BMP2	bone morphogenetic protein 2	1069	Homo sapiens	brachydactyly type A2	BMP2A	1069	P12643	NP_001191.1
Matrisome-associated	Secreted Factors	BMP2	bone morphogenetic protein 2	1069	Homo sapiens	short stature, facial dysmorphism, and skeletal anomalies with or without cardiac anomalies	BMP2A	1069	P12643	NP_001191.1
Matrisome-associated	Secreted Factors	BMP4	bone morphogenetic protein 4	1071	Homo sapiens	microphthalmia with brain and digit anomalies	BMP2B|BMP2B1|MCOPS6|OFC11|ZYME	1071	H0YLW3:H0YM53:H0YMP9:P12644:V9GYF1	NP_001193.2:NP_570911.2:NP_570912.2:XP_005268072.1
Matrisome-associated	Secreted Factors	BMP4	bone morphogenetic protein 4	1071	Homo sapiens	orofacial cleft 11	BMP2B|BMP2B1|MCOPS6|OFC11|ZYME	1071	H0YLW3:H0YM53:H0YMP9:P12644:V9GYF1	NP_001193.2:NP_570911.2:NP_570912.2:XP_005268072.1
Matrisome-associated	Secreted Factors	BMP4	bone morphogenetic protein 4	1071	Homo sapiens	renal agenesis, unilateral	BMP2B|BMP2B1|MCOPS6|OFC11|ZYME	1071	H0YLW3:H0YM53:H0YMP9:P12644:V9GYF1	NP_001193.2:NP_570911.2:NP_570912.2:XP_005268072.1
Matrisome-associated	Secreted Factors	BMP6	bone morphogenetic protein 6	1073	Homo sapiens	hemochromatosis type 5	VGR|VGR1	1073	P22004	NP_001709.1
Matrisome-associated	Secreted Factors	CCBE1	collagen and calcium binding EGF domains 1	29426	Homo sapiens	Hennekam lymphangiectasia-lymphedema syndrome 1	FLJ30681|MGC50861	29426	K7EQ81:Q6UXH8	NP_597716.1:XP_005266705.1:XP_005266706.1:XP_006722456.1
Matrisome-associated	Secreted Factors	CCBE1	collagen and calcium binding EGF domains 1	29426	Homo sapiens	Hennekam syndrome	FLJ30681|MGC50861	29426	K7EQ81:Q6UXH8	NP_597716.1:XP_005266705.1:XP_005266706.1:XP_006722456.1
Matrisome-associated	Secreted Factors	CFC1	cripto, FRL-1, cryptic family 1	18292	Homo sapiens	heterotaxy, visceral, 2, autosomal	CRYPTIC|FLJ77897|HTX2|MGC133213	18292	P0CG37	NP_001257349.1:NP_001257350.1:NP_115934.1
Matrisome-associated	Secreted Factors	CHRDL1	chordin-like 1	29861	Homo sapiens	isolated congenital megalocornea	CHL|NRLN1|VOPT|dA141H5.1	29861	D3YTA8:Q9BU40	NP_001137453.1:NP_001137454.1:NP_001137455.2:NP_660277.2:XP_005262278.1:XP_005262279.1
Matrisome-associated	Secreted Factors	CLCF1	cardiotrophin-like cytokine factor 1	17412	Homo sapiens	cold-induced sweating syndrome	BSF-3|BSF3|CISS2|CLC|NNT-1|NNT1|NR6	17412	Q9UBD9	NP_001159684.1:NP_037378.1
Matrisome-associated	Secreted Factors	CLCF1	cardiotrophin-like cytokine factor 1	17412	Homo sapiens	cold-induced sweating syndrome 2	BSF-3|BSF3|CISS2|CLC|NNT-1|NNT1|NR6	17412	Q9UBD9	NP_001159684.1:NP_037378.1
Matrisome-associated	Secreted Factors	CLCF1	cardiotrophin-like cytokine factor 1	17412	Homo sapiens	Crisponi syndrome	BSF-3|BSF3|CISS2|CLC|NNT-1|NNT1|NR6	17412	Q9UBD9	NP_001159684.1:NP_037378.1
Matrisome-associated	Secreted Factors	CRLF1	cytokine receptor-like factor 1	2364	Homo sapiens	cold-induced sweating syndrome	CISS|CISS1|CLF|CLF-1|NR6|zcytor5	2364	M0QZL6:O75462	NP_004741.1
Matrisome-associated	Secreted Factors	CRLF1	cytokine receptor-like factor 1	2364	Homo sapiens	Crisponi syndrome	CISS|CISS1|CLF|CLF-1|NR6|zcytor5	2364	M0QZL6:O75462	NP_004741.1
Matrisome-associated	Secreted Factors	CRLF1	cytokine receptor-like factor 1	2364	Homo sapiens	idiopathic achalasia	CISS|CISS1|CLF|CLF-1|NR6|zcytor5	2364	M0QZL6:O75462	NP_004741.1
Matrisome-associated	Secreted Factors	DHH	desert hedgehog homolog (Drosophila)	2865	Homo sapiens	,XY complete gonadal dysgenesis	HHG-3|MGC35145	2865	O43323	NP_066382.1
Matrisome-associated	Secreted Factors	DHH	desert hedgehog homolog (Drosophila)	2865	Homo sapiens	,XY gonadal dysgenesis-motor and sensory neuropathy syndrome	HHG-3|MGC35145	2865	O43323	NP_066382.1
Matrisome-associated	Secreted Factors	DHH	desert hedgehog homolog (Drosophila)	2865	Homo sapiens	,XY sex reversal 7	HHG-3|MGC35145	2865	O43323	NP_066382.1
Matrisome-associated	Secreted Factors	EDA	ectodysplasin A	3157	Homo sapiens	tooth agenesis	ED1|ED1-A1|ED1-A2|EDA1|EDA2|HED|STHAGX1|XHED|XLHED	3157	D6RA95:Q92838	NP_001005609.1:NP_001005610.2:NP_001005612.2:NP_001005613.1:NP_001390.1
Matrisome-associated	Secreted Factors	EDA	ectodysplasin A	3157	Homo sapiens	tooth agenesis, selective, X-linked, 1	ED1|ED1-A1|ED1-A2|EDA1|EDA2|HED|STHAGX1|XHED|XLHED	3157	D6RA95:Q92838	NP_001005609.1:NP_001005610.2:NP_001005612.2:NP_001005613.1:NP_001390.1
Matrisome-associated	Secreted Factors	EDA	ectodysplasin A	3157	Homo sapiens	X-linked hypohidrotic ectodermal dysplasia	ED1|ED1-A1|ED1-A2|EDA1|EDA2|HED|STHAGX1|XHED|XLHED	3157	D6RA95:Q92838	NP_001005609.1:NP_001005610.2:NP_001005612.2:NP_001005613.1:NP_001390.1
Matrisome-associated	Secreted Factors	EGF	epidermal growth factor (beta-urogastrone)	3229	Homo sapiens	familial primary hypomagnesemia with normocalciuria and normocalcemia	HOMG4|URG	3229	P01133	NP_001171601.1:NP_001171602.1:NP_001954.2
Matrisome-associated	Secreted Factors	EGF	epidermal growth factor (beta-urogastrone)	3229	Homo sapiens	renal hypomagnesemia 4	HOMG4|URG	3229	P01133	NP_001171601.1:NP_001171602.1:NP_001954.2
Matrisome-associated	Secreted Factors	EPO	erythropoietin	3415	Homo sapiens	autosomal dominant secondary polycythemia	EP|MGC138142|MVCD2	3415	P01588	NP_000790.2
Matrisome-associated	Secreted Factors	EPO	erythropoietin	3415	Homo sapiens	erythrocytosis, familial, 5	EP|MGC138142|MVCD2	3415	P01588	NP_000790.2
Matrisome-associated	Secreted Factors	FASLG	Fas ligand (TNF superfamily, member 6)	11936	Homo sapiens	autoimmune lymphoproliferative syndrome	APT1LG1|CD178|CD95L|FASL|TNFSF6	11936	P48023	NP_000630.1
Matrisome-associated	Secreted Factors	FASLG	Fas ligand (TNF superfamily, member 6)	11936	Homo sapiens	autoimmune lymphoproliferative syndrome type 1	APT1LG1|CD178|CD95L|FASL|TNFSF6	11936	P48023	NP_000630.1
Matrisome-associated	Secreted Factors	FGF10	fibroblast growth factor 10	3666	Homo sapiens	aplasia of lacrimal and salivary glands	-	3666	D6RG33:O15520	NP_004456.1:XP_005248321.1
Matrisome-associated	Secreted Factors	FGF10	fibroblast growth factor 10	3666	Homo sapiens	LADD syndrome	-	3666	D6RG33:O15520	NP_004456.1:XP_005248321.1
Matrisome-associated	Secreted Factors	FGF12	fibroblast growth factor 12	3668	Homo sapiens	epileptic encephalopathy, early infantile, 47	FGF12B|FHF1	3668	C9JEN8:C9JIN3:C9JUK8:H7C1L8:P61328	NP_004104.3:NP_066360.1
Matrisome-associated	Secreted Factors	FGF12	fibroblast growth factor 12	3668	Homo sapiens	undetermined early-onset epileptic encephalopathy	FGF12B|FHF1	3668	C9JEN8:C9JIN3:C9JUK8:H7C1L8:P61328	NP_004104.3:NP_066360.1
Matrisome-associated	Secreted Factors	FGF14	fibroblast growth factor 14	3671	Homo sapiens	spinocerebellar ataxia type 27	FHF4|MGC119129|SCA27	3671	Q92915	NP_004106.1:NP_787125.1
Matrisome-associated	Secreted Factors	FGF16	fibroblast growth factor 16	3672	Homo sapiens	syndactyly type 8	-	3672	H0Y5L6:O43320	NP_003859.1
Matrisome-associated	Secreted Factors	FGF17	fibroblast growth factor 17	3673	Homo sapiens	hypogonadotropic hypogonadism	FGF-13	3673	O60258	NP_003858.1:XP_005273733.1
Matrisome-associated	Secreted Factors	FGF17	fibroblast growth factor 17	3673	Homo sapiens	hypogonadotropic hypogonadism 20 with or without anosmia	FGF-13	3673	O60258	NP_003858.1:XP_005273733.1
Matrisome-associated	Secreted Factors	FGF17	fibroblast growth factor 17	3673	Homo sapiens	Kallmann syndrome	FGF-13	3673	O60258	NP_003858.1:XP_005273733.1
Matrisome-associated	Secreted Factors	FGF20	fibroblast growth factor 20	3677	Homo sapiens	bilateral renal agenesis	-	3677	H0YAT9:Q9NP95	NP_062825.1
Matrisome-associated	Secreted Factors	FGF23	fibroblast growth factor 23	3680	Homo sapiens	autosomal dominant hypophosphatemic rickets	ADHR|HPDR2|HYPF|PHPTC	3680	Q9GZV9	NP_065689.1
Matrisome-associated	Secreted Factors	FGF23	fibroblast growth factor 23	3680	Homo sapiens	hyperphosphatemic familial tumoral calcinosis	ADHR|HPDR2|HYPF|PHPTC	3680	Q9GZV9	NP_065689.1
Matrisome-associated	Secreted Factors	FGF23	fibroblast growth factor 23	3680	Homo sapiens	tumoral calcinosis, hyperphosphatemic, familial, 2	ADHR|HPDR2|HYPF|PHPTC	3680	Q9GZV9	NP_065689.1
Matrisome-associated	Secreted Factors	FGF3	fibroblast growth factor 3 (murine mammary tumor virus integration site (v-int-2) oncogene homolog)	3681	Homo sapiens	deafness with labyrinthine aplasia, microtia, and microdontia	HBGF-3|INT2	3681	P11487	NP_005238.1
Matrisome-associated	Secreted Factors	FGF5	fibroblast growth factor 5	3683	Homo sapiens	familial isolated trichomegaly	HBGF-5|Smag-82	3683	H0Y9E2:P12034	NP_004455.2:NP_149134.1
Matrisome-associated	Secreted Factors	FGF5	fibroblast growth factor 5	3683	Homo sapiens	trichomegaly	HBGF-5|Smag-82	3683	H0Y9E2:P12034	NP_004455.2:NP_149134.1
Matrisome-associated	Secreted Factors	FGF8	fibroblast growth factor 8 (androgen-induced)	3686	Homo sapiens	alobar holoprosencephaly	AIGF|HBGF-8|KAL6|MGC149376	3686	P55075:R4GMQ3	NP_006110.1:NP_149353.1:NP_149354.1:NP_149355.1
Matrisome-associated	Secreted Factors	FGF8	fibroblast growth factor 8 (androgen-induced)	3686	Homo sapiens	hypogonadotropic hypogonadism	AIGF|HBGF-8|KAL6|MGC149376	3686	P55075:R4GMQ3	NP_006110.1:NP_149353.1:NP_149354.1:NP_149355.1
Matrisome-associated	Secreted Factors	FGF8	fibroblast growth factor 8 (androgen-induced)	3686	Homo sapiens	hypogonadotropic hypogonadism 6 with or without anosmia	AIGF|HBGF-8|KAL6|MGC149376	3686	P55075:R4GMQ3	NP_006110.1:NP_149353.1:NP_149354.1:NP_149355.1
Matrisome-associated	Secreted Factors	FGF8	fibroblast growth factor 8 (androgen-induced)	3686	Homo sapiens	Kallmann syndrome	AIGF|HBGF-8|KAL6|MGC149376	3686	P55075:R4GMQ3	NP_006110.1:NP_149353.1:NP_149354.1:NP_149355.1
Matrisome-associated	Secreted Factors	FGF8	fibroblast growth factor 8 (androgen-induced)	3686	Homo sapiens	lobar holoprosencephaly	AIGF|HBGF-8|KAL6|MGC149376	3686	P55075:R4GMQ3	NP_006110.1:NP_149353.1:NP_149354.1:NP_149355.1
Matrisome-associated	Secreted Factors	FGF8	fibroblast growth factor 8 (androgen-induced)	3686	Homo sapiens	microform holoprosencephaly	AIGF|HBGF-8|KAL6|MGC149376	3686	P55075:R4GMQ3	NP_006110.1:NP_149353.1:NP_149354.1:NP_149355.1
Matrisome-associated	Secreted Factors	FGF8	fibroblast growth factor 8 (androgen-induced)	3686	Homo sapiens	midline interhemispheric variant of holoprosencephaly	AIGF|HBGF-8|KAL6|MGC149376	3686	P55075:R4GMQ3	NP_006110.1:NP_149353.1:NP_149354.1:NP_149355.1
Matrisome-associated	Secreted Factors	FGF8	fibroblast growth factor 8 (androgen-induced)	3686	Homo sapiens	semilobar holoprosencephaly	AIGF|HBGF-8|KAL6|MGC149376	3686	P55075:R4GMQ3	NP_006110.1:NP_149353.1:NP_149354.1:NP_149355.1
Matrisome-associated	Secreted Factors	FGF8	fibroblast growth factor 8 (androgen-induced)	3686	Homo sapiens	septopreoptic holoprosencephaly	AIGF|HBGF-8|KAL6|MGC149376	3686	P55075:R4GMQ3	NP_006110.1:NP_149353.1:NP_149354.1:NP_149355.1
Matrisome-associated	Secreted Factors	FGF9	fibroblast growth factor 9 (glia-activating factor)	3687	Homo sapiens	multiple synostoses syndrome	GAF|HBFG-9|MGC119914|MGC119915|SYNS3	3687	P31371	NP_002001.1
Matrisome-associated	Secreted Factors	FGF9	fibroblast growth factor 9 (glia-activating factor)	3687	Homo sapiens	multiple synostoses syndrome 3	GAF|HBFG-9|MGC119914|MGC119915|SYNS3	3687	P31371	NP_002001.1
Matrisome-associated	Secreted Factors	FLG	filaggrin	3748	Homo sapiens	autosomal dominant ichthyosis vulgaris	ATOD2	3748	P20930	NP_002007.1
Matrisome-associated	Secreted Factors	FLG2	filaggrin family member 2	33276	Homo sapiens	peeling skin syndrome 6	IFPS	33276	Q5D862	NP_001014364.1
Matrisome-associated	Secreted Factors	FLG2	filaggrin family member 2	33276	Homo sapiens	peeling skin syndrome type A	IFPS	33276	Q5D862	NP_001014364.1
Matrisome-associated	Secreted Factors	GDF1	growth differentiation factor 1	4214	Homo sapiens	dextro-looped transposition of the great arteries 3	-	4214	P27539	NP_001483.3
Matrisome-associated	Secreted Factors	GDF1	growth differentiation factor 1	4214	Homo sapiens	right atrial isomerism (disease)	-	4214	P27539	NP_001483.3
Matrisome-associated	Secreted Factors	GDF2	growth differentiation factor 2	4217	Homo sapiens	hereditary hemorrhagic telangiectasia	BMP-9|BMP9	4217	Q9UK05	NP_057288.1
Matrisome-associated	Secreted Factors	GDF2	growth differentiation factor 2	4217	Homo sapiens	telangiectasia, hereditary hemorrhagic, type 5	BMP-9|BMP9	4217	Q9UK05	NP_057288.1
Matrisome-associated	Secreted Factors	GDF3	growth differentiation factor 3	4218	Homo sapiens	colobomatous microphthalmia	-	4218	Q9NR23	NP_065685.1
Matrisome-associated	Secreted Factors	GDF3	growth differentiation factor 3	4218	Homo sapiens	isolated anophthalmia-microphthalmia syndrome	-	4218	Q9NR23	NP_065685.1
Matrisome-associated	Secreted Factors	GDF3	growth differentiation factor 3	4218	Homo sapiens	isolated Klippel-Feil syndrome	-	4218	Q9NR23	NP_065685.1
Matrisome-associated	Secreted Factors	GDF3	growth differentiation factor 3	4218	Homo sapiens	isolated microphthalmia 7	-	4218	Q9NR23	NP_065685.1
Matrisome-associated	Secreted Factors	GDF3	growth differentiation factor 3	4218	Homo sapiens	Klippel-Feil syndrome 3, autosomal dominant	-	4218	Q9NR23	NP_065685.1
Matrisome-associated	Secreted Factors	GDF3	growth differentiation factor 3	4218	Homo sapiens	microphthalmia, isolated, with coloboma 6	-	4218	Q9NR23	NP_065685.1
Matrisome-associated	Secreted Factors	GDF5	growth differentiation factor 5	4220	Homo sapiens	acromesomelic dysplasia, Grebe type	BMP14|CDMP1|LAP4|OS5|SYNS2	4220	P43026	NP_000548.2
Matrisome-associated	Secreted Factors	GDF5	growth differentiation factor 5	4220	Homo sapiens	acromesomelic dysplasia, Hunter-Thompson type	BMP14|CDMP1|LAP4|OS5|SYNS2	4220	P43026	NP_000548.2
Matrisome-associated	Secreted Factors	GDF5	growth differentiation factor 5	4220	Homo sapiens	angel-shaped phalango-epiphyseal dysplasia	BMP14|CDMP1|LAP4|OS5|SYNS2	4220	P43026	NP_000548.2
Matrisome-associated	Secreted Factors	GDF5	growth differentiation factor 5	4220	Homo sapiens	brachydactyly type A1	BMP14|CDMP1|LAP4|OS5|SYNS2	4220	P43026	NP_000548.2
Matrisome-associated	Secreted Factors	GDF5	growth differentiation factor 5	4220	Homo sapiens	brachydactyly type A1C	BMP14|CDMP1|LAP4|OS5|SYNS2	4220	P43026	NP_000548.2
Matrisome-associated	Secreted Factors	GDF5	growth differentiation factor 5	4220	Homo sapiens	brachydactyly type A2	BMP14|CDMP1|LAP4|OS5|SYNS2	4220	P43026	NP_000548.2
Matrisome-associated	Secreted Factors	GDF5	growth differentiation factor 5	4220	Homo sapiens	brachydactyly type C	BMP14|CDMP1|LAP4|OS5|SYNS2	4220	P43026	NP_000548.2
Matrisome-associated	Secreted Factors	GDF5	growth differentiation factor 5	4220	Homo sapiens	fibular hypoplasia and complex brachydactyly	BMP14|CDMP1|LAP4|OS5|SYNS2	4220	P43026	NP_000548.2
Matrisome-associated	Secreted Factors	GDF5	growth differentiation factor 5	4220	Homo sapiens	multiple synostoses syndrome	BMP14|CDMP1|LAP4|OS5|SYNS2	4220	P43026	NP_000548.2
Matrisome-associated	Secreted Factors	GDF5	growth differentiation factor 5	4220	Homo sapiens	multiple synostoses syndrome 2	BMP14|CDMP1|LAP4|OS5|SYNS2	4220	P43026	NP_000548.2
Matrisome-associated	Secreted Factors	GDF5	growth differentiation factor 5	4220	Homo sapiens	proximal symphalangism (disease)	BMP14|CDMP1|LAP4|OS5|SYNS2	4220	P43026	NP_000548.2
Matrisome-associated	Secreted Factors	GDF5	growth differentiation factor 5	4220	Homo sapiens	symphalangism, proximal, 1B	BMP14|CDMP1|LAP4|OS5|SYNS2	4220	P43026	NP_000548.2
Matrisome-associated	Secreted Factors	GDF6	growth differentiation factor 6	4221	Homo sapiens	isolated Klippel-Feil syndrome	BMP13|CDMP2|KFS|KFSL|MCOP4|MGC158100|MGC158101|SCD	4221	Q6KF10	NP_001001557.1
Matrisome-associated	Secreted Factors	GDF6	growth differentiation factor 6	4221	Homo sapiens	isolated microphthalmia 4	BMP13|CDMP2|KFS|KFSL|MCOP4|MGC158100|MGC158101|SCD	4221	Q6KF10	NP_001001557.1
Matrisome-associated	Secreted Factors	GDF6	growth differentiation factor 6	4221	Homo sapiens	Klippel-Feil syndrome 1, autosomal dominant	BMP13|CDMP2|KFS|KFSL|MCOP4|MGC158100|MGC158101|SCD	4221	Q6KF10	NP_001001557.1
Matrisome-associated	Secreted Factors	GDF6	growth differentiation factor 6	4221	Homo sapiens	Leber congenital amaurosis	BMP13|CDMP2|KFS|KFSL|MCOP4|MGC158100|MGC158101|SCD	4221	Q6KF10	NP_001001557.1
Matrisome-associated	Secreted Factors	GDF6	growth differentiation factor 6	4221	Homo sapiens	Leber congenital amaurosis 17	BMP13|CDMP2|KFS|KFSL|MCOP4|MGC158100|MGC158101|SCD	4221	Q6KF10	NP_001001557.1
Matrisome-associated	Secreted Factors	GDF6	growth differentiation factor 6	4221	Homo sapiens	microphthalmia, isolated, with coloboma 6	BMP13|CDMP2|KFS|KFSL|MCOP4|MGC158100|MGC158101|SCD	4221	Q6KF10	NP_001001557.1
Matrisome-associated	Secreted Factors	GDF6	growth differentiation factor 6	4221	Homo sapiens	multiple synostoses syndrome 4	BMP13|CDMP2|KFS|KFSL|MCOP4|MGC158100|MGC158101|SCD	4221	Q6KF10	NP_001001557.1
Matrisome-associated	Secreted Factors	GDNF	glial cell derived neurotrophic factor	4232	Homo sapiens	congenital central hypoventilation syndrome	ATF1|ATF2|HFB1-GDNF	4232	P39905	NP_000505.1:NP_001177397.1:NP_001177398.1:NP_001265027.1:NP_954701.1
Matrisome-associated	Secreted Factors	GH1	growth hormone 1	4261	Homo sapiens	isolated growth hormone deficiency type IA	GH|GH-N|GHN|IGHD1B|hGH-N	4261	B1A4G9:P01241	NP_000506.2:NP_072053.1:NP_072054.1:XP_005257275.1:XP_005257276.1:NP_072055.1
Matrisome-associated	Secreted Factors	GH1	growth hormone 1	4261	Homo sapiens	isolated growth hormone deficiency type IB	GH|GH-N|GHN|IGHD1B|hGH-N	4261	B1A4G9:P01241	NP_000506.2:NP_072053.1:NP_072054.1:XP_005257275.1:XP_005257276.1:NP_072055.1
Matrisome-associated	Secreted Factors	GH1	growth hormone 1	4261	Homo sapiens	isolated growth hormone deficiency type II	GH|GH-N|GHN|IGHD1B|hGH-N	4261	B1A4G9:P01241	NP_000506.2:NP_072053.1:NP_072054.1:XP_005257275.1:XP_005257276.1:NP_072055.1
Matrisome-associated	Secreted Factors	GH1	growth hormone 1	4261	Homo sapiens	short stature due to growth hormone qualitative anomaly	GH|GH-N|GHN|IGHD1B|hGH-N	4261	B1A4G9:P01241	NP_000506.2:NP_072053.1:NP_072054.1:XP_005257275.1:XP_005257276.1:NP_072055.1
Matrisome-associated	Secreted Factors	HCFC1	host cell factor C1 (VP16-accessory protein)	4839	Homo sapiens	methylmalonic acidemia with homocystinuria, type cblX	CFF|HCF-1|HCF1|HFC1|MGC70925|VCAF	4839	A6NEM2:H7C1C4:P51610	NP_005325.2:XP_006724879.1:XP_006724878.1
Matrisome-associated	Secreted Factors	HCFC1	host cell factor C1 (VP16-accessory protein)	4839	Homo sapiens	non-syndromic X-linked intellectual disability	CFF|HCF-1|HCF1|HFC1|MGC70925|VCAF	4839	A6NEM2:H7C1C4:P51610	NP_005325.2:XP_006724879.1:XP_006724878.1
Matrisome-associated	Secreted Factors	HGF	hepatocyte growth factor (hepapoietin A	NA	Homo sapiens	autosomal recessive nonsyndromic deafness	NA	NA	NA	NA
Matrisome-associated	Secreted Factors	HGF	hepatocyte growth factor (hepapoietin A	NA	Homo sapiens	autosomal recessive nonsyndromic deafness 39	NA	NA	NA	NA
Matrisome-associated	Secreted Factors	IGF2	insulin-like growth factor 2 (somatomedin A)	5466	Homo sapiens	isolated hemihyperplasia	C11orf43|FLJ22066|FLJ44734|INSIGF|pp9974	5466	P01344	NP_000603.1:NP_001007140.2:NP_001121070.1:NP_001278790.1:NP_001278791.1
Matrisome-associated	Secreted Factors	IGF2	insulin-like growth factor 2 (somatomedin A)	5466	Homo sapiens	Silver-Russell syndrome due to a point mutation	C11orf43|FLJ22066|FLJ44734|INSIGF|pp9974	5466	P01344	NP_000603.1:NP_001007140.2:NP_001121070.1:NP_001278790.1:NP_001278791.1
Matrisome-associated	Secreted Factors	IHH	Indian hedgehog homolog (Drosophila)	5956	Homo sapiens	acrocapitofemoral dysplasia	BDA1|HHG2	5956	Q14623	NP_002172.2
Matrisome-associated	Secreted Factors	IHH	Indian hedgehog homolog (Drosophila)	5956	Homo sapiens	brachydactyly type A1	BDA1|HHG2	5956	Q14623	NP_002172.2
Matrisome-associated	Secreted Factors	IHH	Indian hedgehog homolog (Drosophila)	5956	Homo sapiens	brachydactyly type A1A	BDA1|HHG2	5956	Q14623	NP_002172.2
Matrisome-associated	Secreted Factors	IL17F	interleukin 17F	16404	Homo sapiens	chronic mucocutaneous candidiasis (disease)	IL-17F|ML-1|ML1	16404	Q96PD4	NP_443104.1
Matrisome-associated	Secreted Factors	IL1RN	interleukin 1 receptor antagonist	6000	Homo sapiens	sterile multifocal osteomyelitis with periostitis and pustulosis	DIRA|ICIL-1RA|IL-1ra3|IL1F3|IL1RA|IRAP|MGC10430|MV	6000	P18510	NP_000568.1:NP_776213.1:NP_776214.1:NP_776215.1:XP_005263718.1:XP_006712560.1
Matrisome-associated	Secreted Factors	IL7	interleukin 7	6023	Homo sapiens	epidermodysplasia verruciformis	IL-7	6023	P13232:Q5FBY3:Q5FBY6	NP_000871.1:NP_001186815.1:NP_001186816.1:NP_001186817.1
Matrisome-associated	Secreted Factors	INHBA	inhibin, beta A	6066	Homo sapiens	ovarian adenocarcinoma	EDF|FRP	6066	P08476	NP_002183.1
Matrisome-associated	Secreted Factors	INSL3	insulin-like 3 (Leydig cell)	6086	Homo sapiens	cryptorchidism (disease)	MGC119818|MGC119819|RLF|RLNL	6086	M0QXQ3:P51460	NP_001252516.1:NP_005534.2
Matrisome-associated	Secreted Factors	KITLG	KIT ligand	6343	Homo sapiens	autosomal dominant nonsyndromic deafness	DKFZp686F2250|FPH2|KL-1|Kitl|MGF|SCF|SF|SHEP7	6343	P21583:S4R384:S4R442	NP_000890.1:NP_003985.2
Matrisome-associated	Secreted Factors	KITLG	KIT ligand	6343	Homo sapiens	autosomal dominant nonsyndromic deafness 69	DKFZp686F2250|FPH2|KL-1|Kitl|MGF|SCF|SF|SHEP7	6343	P21583:S4R384:S4R442	NP_000890.1:NP_003985.2
Matrisome-associated	Secreted Factors	KITLG	KIT ligand	6343	Homo sapiens	familial progressive hyper- and hypopigmentation	DKFZp686F2250|FPH2|KL-1|Kitl|MGF|SCF|SF|SHEP7	6343	P21583:S4R384:S4R442	NP_000890.1:NP_003985.2
Matrisome-associated	Secreted Factors	KITLG	KIT ligand	6343	Homo sapiens	familial progressive hyperpigmentation	DKFZp686F2250|FPH2|KL-1|Kitl|MGF|SCF|SF|SHEP7	6343	P21583:S4R384:S4R442	NP_000890.1:NP_003985.2
Matrisome-associated	Secreted Factors	KITLG	KIT ligand	6343	Homo sapiens	hyperpigmentation with or without hypopigmentation, familial progressive	DKFZp686F2250|FPH2|KL-1|Kitl|MGF|SCF|SF|SHEP7	6343	P21583:S4R384:S4R442	NP_000890.1:NP_003985.2
Matrisome-associated	Secreted Factors	KITLG	KIT ligand	6343	Homo sapiens	Waardenburg syndrome type 2	DKFZp686F2250|FPH2|KL-1|Kitl|MGF|SCF|SF|SHEP7	6343	P21583:S4R384:S4R442	NP_000890.1:NP_003985.2
Matrisome-associated	Secreted Factors	LEP	leptin	6553	Homo sapiens	obesity due to congenital leptin deficiency	FLJ94114|OB|OBS	6553	P41159	NP_000221.1:XP_005250397.1
Matrisome-associated	Secreted Factors	MEGF10	multiple EGF-like-domains 10	29634	Homo sapiens	early-onset myopathy-areflexia-respiratory distress-dysphagia syndrome	DKFZp781K1852|FLJ41574|KIAA1780	29634	Q96KG7	NP_001243474.1:NP_115822.1
Matrisome-associated	Secreted Factors	MEGF8	multiple EGF-like-domains 8	3233	Homo sapiens	Carpenter syndrome	C19orf49|EGFL4|FLJ22365|MGC120684|MGC138147|SBP1	3233	F5GZG7:M0QZL2:M0R0Q0:Q7Z7M0	NP_001258867.1:NP_001401.2
Matrisome-associated	Secreted Factors	MEGF8	multiple EGF-like-domains 8	3233	Homo sapiens	Carpenter syndrome 2	C19orf49|EGFL4|FLJ22365|MGC120684|MGC138147|SBP1	3233	F5GZG7:M0QZL2:M0R0Q0:Q7Z7M0	NP_001258867.1:NP_001401.2
Matrisome-associated	Secreted Factors	MSTN	myostatin	4223	Homo sapiens	myostatin-related muscle hypertrophy	GDF8	4223	O14793	NP_005250.1
Matrisome-associated	Secreted Factors	NGF	nerve growth factor (beta polypeptide)	7808	Homo sapiens	hereditary sensory and autonomic neuropathy type 5	Beta-NGF|HSAN5|MGC161426|MGC161428|NGFB	7808	P01138	NP_002497.2:XP_006710726.1:XP_006710727.1:XP_006710728.1
Matrisome-associated	Secreted Factors	NODAL	nodal homolog (mouse)	7865	Homo sapiens	alobar holoprosencephaly	MGC138230	7865	H7C0E4:Q96S42	NP_060525.3
Matrisome-associated	Secreted Factors	NODAL	nodal homolog (mouse)	7865	Homo sapiens	lobar holoprosencephaly	MGC138230	7865	H7C0E4:Q96S42	NP_060525.3
Matrisome-associated	Secreted Factors	NODAL	nodal homolog (mouse)	7865	Homo sapiens	microform holoprosencephaly	MGC138230	7865	H7C0E4:Q96S42	NP_060525.3
Matrisome-associated	Secreted Factors	NODAL	nodal homolog (mouse)	7865	Homo sapiens	midline interhemispheric variant of holoprosencephaly	MGC138230	7865	H7C0E4:Q96S42	NP_060525.3
Matrisome-associated	Secreted Factors	NODAL	nodal homolog (mouse)	7865	Homo sapiens	semilobar holoprosencephaly	MGC138230	7865	H7C0E4:Q96S42	NP_060525.3
Matrisome-associated	Secreted Factors	NODAL	nodal homolog (mouse)	7865	Homo sapiens	septopreoptic holoprosencephaly	MGC138230	7865	H7C0E4:Q96S42	NP_060525.3
Matrisome-associated	Secreted Factors	NODAL	nodal homolog (mouse)	7865	Homo sapiens	situs inversus	MGC138230	7865	H7C0E4:Q96S42	NP_060525.3
Matrisome-associated	Secreted Factors	NTF4	neurotrophin 4	8024	Homo sapiens	glaucoma 1, open angle, O	GLC10|GLC1O|NT-4/5|NT4|NT5|NTF5	8024	E7EP46:M0QZQ0:M0R0X2:P34130	NP_006170.1:XP_005259019.1:XP_006723295.1
Matrisome-associated	Secreted Factors	PDGFB	platelet-derived growth factor beta polypeptide (simian sarcoma viral (v-sis) oncogene homolog)	8800	Homo sapiens	basal ganglia calcification, idiopathic, 5	FLJ12858|PDGF2|SIS|SSV|c-sis	8800	A9UJN9:A9UJP0:P01127	NP_002599.1:NP_148937.1
Matrisome-associated	Secreted Factors	PDGFB	platelet-derived growth factor beta polypeptide (simian sarcoma viral (v-sis) oncogene homolog)	8800	Homo sapiens	bilateral striopallidodentate calcinosis	FLJ12858|PDGF2|SIS|SSV|c-sis	8800	A9UJN9:A9UJP0:P01127	NP_002599.1:NP_148937.1
Matrisome-associated	Secreted Factors	PDGFB	platelet-derived growth factor beta polypeptide (simian sarcoma viral (v-sis) oncogene homolog)	8800	Homo sapiens	dermatofibrosarcoma protuberans	FLJ12858|PDGF2|SIS|SSV|c-sis	8800	A9UJN9:A9UJP0:P01127	NP_002599.1:NP_148937.1
Matrisome-associated	Secreted Factors	PDGFB	platelet-derived growth factor beta polypeptide (simian sarcoma viral (v-sis) oncogene homolog)	8800	Homo sapiens	familial meningioma	FLJ12858|PDGF2|SIS|SSV|c-sis	8800	A9UJN9:A9UJP0:P01127	NP_002599.1:NP_148937.1
Matrisome-associated	Secreted Factors	PDGFB	platelet-derived growth factor beta polypeptide (simian sarcoma viral (v-sis) oncogene homolog)	8800	Homo sapiens	meningioma (disease)	FLJ12858|PDGF2|SIS|SSV|c-sis	8800	A9UJN9:A9UJP0:P01127	NP_002599.1:NP_148937.1
Matrisome-associated	Secreted Factors	SFRP4	secreted frizzled-related protein 4	10778	Homo sapiens	Pyle disease	FRP-4|FRPHE|MGC26498	10778	C9JMJ2:Q6FHJ7	NP_003005.2
Matrisome-associated	Secreted Factors	TDGF1	teratocarcinoma-derived growth factor 1	11701	Homo sapiens	alobar holoprosencephaly	CR|CRGF|CRIPTO|Cripto-1	11701	F5H1T8:P13385	NP_001167607.1:NP_001167607.1:NP_003203.1
Matrisome-associated	Secreted Factors	TDGF1	teratocarcinoma-derived growth factor 1	11701	Homo sapiens	lobar holoprosencephaly	CR|CRGF|CRIPTO|Cripto-1	11701	F5H1T8:P13385	NP_001167607.1:NP_001167607.1:NP_003203.1
Matrisome-associated	Secreted Factors	TDGF1	teratocarcinoma-derived growth factor 1	11701	Homo sapiens	microform holoprosencephaly	CR|CRGF|CRIPTO|Cripto-1	11701	F5H1T8:P13385	NP_001167607.1:NP_001167607.1:NP_003203.1
Matrisome-associated	Secreted Factors	TDGF1	teratocarcinoma-derived growth factor 1	11701	Homo sapiens	midline interhemispheric variant of holoprosencephaly	CR|CRGF|CRIPTO|Cripto-1	11701	F5H1T8:P13385	NP_001167607.1:NP_001167607.1:NP_003203.1
Matrisome-associated	Secreted Factors	TDGF1	teratocarcinoma-derived growth factor 1	11701	Homo sapiens	semilobar holoprosencephaly	CR|CRGF|CRIPTO|Cripto-1	11701	F5H1T8:P13385	NP_001167607.1:NP_001167607.1:NP_003203.1
Matrisome-associated	Secreted Factors	TDGF1	teratocarcinoma-derived growth factor 1	11701	Homo sapiens	septopreoptic holoprosencephaly	CR|CRGF|CRIPTO|Cripto-1	11701	F5H1T8:P13385	NP_001167607.1:NP_001167607.1:NP_003203.1
Matrisome-associated	Secreted Factors	TGFA	transforming growth factor, alpha	11765	Homo sapiens	tooth agenesis	TFGA	11765	E7EPT6:F8VNR3:F8WA74:H0Y6S5:P01135	NP_001093161.1:NP_003227.1:XP_005264579.1
Matrisome-associated	Secreted Factors	TGFB1	transforming growth factor, beta 1	11766	Homo sapiens	Camurati-Engelmann disease	CED|DPD1|LAP|TGFB|TGFbeta	11766	M0R2S0:P01137	NP_000651.3
Matrisome-associated	Secreted Factors	TGFB2	transforming growth factor, beta 2	11768	Homo sapiens	familial thoracic aortic aneurysm and aortic dissection	MGC116892|TGF-beta2	11768	P61812	NP_001129071.1:NP_003229.1
Matrisome-associated	Secreted Factors	TGFB2	transforming growth factor, beta 2	11768	Homo sapiens	Loeys-Dietz syndrome 4	MGC116892|TGF-beta2	11768	P61812	NP_001129071.1:NP_003229.1
Matrisome-associated	Secreted Factors	TGFB3	transforming growth factor, beta 3	11769	Homo sapiens	arrhythmogenic right ventricular dysplasia 1	ARVD|FLJ16571|TGF-beta3	11769	P10600:Q8WV88	NP_003230.1:XP_005268085.1
Matrisome-associated	Secreted Factors	TGFB3	transforming growth factor, beta 3	11769	Homo sapiens	familial isolated arrhythmogenic ventricular dysplasia, biventricular form	ARVD|FLJ16571|TGF-beta3	11769	P10600:Q8WV88	NP_003230.1:XP_005268085.1
Matrisome-associated	Secreted Factors	TGFB3	transforming growth factor, beta 3	11769	Homo sapiens	familial isolated arrhythmogenic ventricular dysplasia, left dominant form	ARVD|FLJ16571|TGF-beta3	11769	P10600:Q8WV88	NP_003230.1:XP_005268085.1
Matrisome-associated	Secreted Factors	TGFB3	transforming growth factor, beta 3	11769	Homo sapiens	familial isolated arrhythmogenic ventricular dysplasia, right dominant form	ARVD|FLJ16571|TGF-beta3	11769	P10600:Q8WV88	NP_003230.1:XP_005268085.1
Matrisome-associated	Secreted Factors	TGFB3	transforming growth factor, beta 3	11769	Homo sapiens	familial thoracic aortic aneurysm and aortic dissection	ARVD|FLJ16571|TGF-beta3	11769	P10600:Q8WV88	NP_003230.1:XP_005268085.1
Matrisome-associated	Secreted Factors	TGFB3	transforming growth factor, beta 3	11769	Homo sapiens	Rienhoff syndrome	ARVD|FLJ16571|TGF-beta3	11769	P10600:Q8WV88	NP_003230.1:XP_005268085.1
Matrisome-associated	Secreted Factors	THPO	thrombopoietin	11795	Homo sapiens	familial thrombocytosis	MGC163194|MGDF|MKCSF|ML|MPLLG|TPO	11795	F8W6L1:P40225	NP_000451.1:NP_001171068.1:NP_001171069.1:NP_001276926.1:NP_001276927.1:NP_001276932.1:NP_001276951.1:NP_001276955.1:NP_001276956.1:NP_001276957.1:NP_001276926.1:NP_001276956.1
Matrisome-associated	Secreted Factors	THPO	thrombopoietin	11795	Homo sapiens	hereditary isolated aplastic anemia	MGC163194|MGDF|MKCSF|ML|MPLLG|TPO	11795	F8W6L1:P40225	NP_000451.1:NP_001171068.1:NP_001171069.1:NP_001276926.1:NP_001276927.1:NP_001276932.1:NP_001276951.1:NP_001276955.1:NP_001276956.1:NP_001276957.1:NP_001276926.1:NP_001276956.1
Matrisome-associated	Secreted Factors	THPO	thrombopoietin	11795	Homo sapiens	hereditary thrombocytosis with transverse limb defect	MGC163194|MGDF|MKCSF|ML|MPLLG|TPO	11795	F8W6L1:P40225	NP_000451.1:NP_001171068.1:NP_001171069.1:NP_001276926.1:NP_001276927.1:NP_001276932.1:NP_001276951.1:NP_001276955.1:NP_001276956.1:NP_001276957.1:NP_001276926.1:NP_001276956.1
Matrisome-associated	Secreted Factors	THPO	thrombopoietin	11795	Homo sapiens	thrombocythemia 1	MGC163194|MGDF|MKCSF|ML|MPLLG|TPO	11795	F8W6L1:P40225	NP_000451.1:NP_001171068.1:NP_001171069.1:NP_001276926.1:NP_001276927.1:NP_001276932.1:NP_001276951.1:NP_001276955.1:NP_001276956.1:NP_001276957.1:NP_001276926.1:NP_001276956.1
Matrisome-associated	Secreted Factors	TNFSF11	tumor necrosis factor (ligand) superfamily, member 11	11926	Homo sapiens	autosomal recessive osteopetrosis	CD254|ODF|OPGL|OPTB2|RANKL|TRANCE|hRANKL2|sOdf	11926	O14788	NP_003692.1:NP_143026.1
Matrisome-associated	Secreted Factors	TNFSF11	tumor necrosis factor (ligand) superfamily, member 11	11926	Homo sapiens	autosomal recessive osteopetrosis 2	CD254|ODF|OPGL|OPTB2|RANKL|TRANCE|hRANKL2|sOdf	11926	O14788	NP_003692.1:NP_143026.1
Matrisome-associated	Secreted Factors	TNFSF12	tumor necrosis factor (ligand) superfamily, member 12	11927	Homo sapiens	common variable immunodeficiency	APO3L|DR3LG|MGC129581|MGC20669|TWEAK	11927	C0H5Y4:O43508	NP_003800.1:NP_742086.1
Matrisome-associated	Secreted Factors	TPO	thyroid peroxidase	12015	Homo sapiens	familial thyroid dyshormonogenesis	MSA|TDH2A|TPX	12015	C9J511:C9JFW0:E9PFM6:H0Y6H4:H7BZH8:H7C1F5:H7C5B6:P07202	NP_000538.3:NP_001193673.1:NP_001193674.1:NP_783650.1:NP_783652.1:NP_783653.1
Matrisome-associated	Secreted Factors	TPO	thyroid peroxidase	12015	Homo sapiens	thyroid dyshormonogenesis 2A	MSA|TDH2A|TPX	12015	C9J511:C9JFW0:E9PFM6:H0Y6H4:H7BZH8:H7C1F5:H7C5B6:P07202	NP_000538.3:NP_001193673.1:NP_001193674.1:NP_783650.1:NP_783652.1:NP_783653.1
Matrisome-associated	Secreted Factors	VEGFC	vascular endothelial growth factor C	12682	Homo sapiens	hereditary lymphedema	Flt4-L|VRP	12682	P49767	NP_005420.1
Matrisome-associated	Secreted Factors	VEGFC	vascular endothelial growth factor C	12682	Homo sapiens	lymphedema, hereditary, 1D	Flt4-L|VRP	12682	P49767	NP_005420.1
Matrisome-associated	Secreted Factors	WNT1	wingless-type MMTV integration site family, member 1	12774	Homo sapiens	osteogenesis imperfecta type 15	INT1	12774	P04628	NP_005421.1
Matrisome-associated	Secreted Factors	WNT1	wingless-type MMTV integration site family, member 1	12774	Homo sapiens	osteogenesis imperfecta type 3	INT1	12774	P04628	NP_005421.1
Matrisome-associated	Secreted Factors	WNT1	wingless-type MMTV integration site family, member 1	12774	Homo sapiens	osteogenesis imperfecta type 4	INT1	12774	P04628	NP_005421.1
Matrisome-associated	Secreted Factors	WNT10A	wingless-type MMTV integration site family, member 10A	13829	Homo sapiens	autosomal recessive hypohidrotic ectodermal dysplasia	FLJ14301|SSPS	13829	H7BZB8:Q9GZT5	NP_079492.2
Matrisome-associated	Secreted Factors	WNT10A	wingless-type MMTV integration site family, member 10A	13829	Homo sapiens	odonto-onycho-dermal dysplasia	FLJ14301|SSPS	13829	H7BZB8:Q9GZT5	NP_079492.2
Matrisome-associated	Secreted Factors	WNT10A	wingless-type MMTV integration site family, member 10A	13829	Homo sapiens	SchC6pf-Schulz-Passarge syndrome	FLJ14301|SSPS	13829	H7BZB8:Q9GZT5	NP_079492.2
Matrisome-associated	Secreted Factors	WNT10A	wingless-type MMTV integration site family, member 10A	13829	Homo sapiens	tooth agenesis	FLJ14301|SSPS	13829	H7BZB8:Q9GZT5	NP_079492.2
Matrisome-associated	Secreted Factors	WNT10A	wingless-type MMTV integration site family, member 10A	13829	Homo sapiens	tooth agenesis, selective, 4	FLJ14301|SSPS	13829	H7BZB8:Q9GZT5	NP_079492.2
Matrisome-associated	Secreted Factors	WNT10B	wingless-type MMTV integration site family, member 10B	12775	Homo sapiens	split hand-foot malformation	SHFM6|WNT-12	12775	B5MCC8:C9J3H3:C9JCI2:O00744:Q4VAJ4	NP_003385.2
Matrisome-associated	Secreted Factors	WNT10B	wingless-type MMTV integration site family, member 10B	12775	Homo sapiens	split hand-foot malformation 6	SHFM6|WNT-12	12775	B5MCC8:C9J3H3:C9JCI2:O00744:Q4VAJ4	NP_003385.2
Matrisome-associated	Secreted Factors	WNT10B	wingless-type MMTV integration site family, member 10B	12775	Homo sapiens	tooth agenesis	SHFM6|WNT-12	12775	B5MCC8:C9J3H3:C9JCI2:O00744:Q4VAJ4	NP_003385.2
Matrisome-associated	Secreted Factors	WNT10B	wingless-type MMTV integration site family, member 10B	12775	Homo sapiens	tooth agenesis, selective, 8	SHFM6|WNT-12	12775	B5MCC8:C9J3H3:C9JCI2:O00744:Q4VAJ4	NP_003385.2
Matrisome-associated	Secreted Factors	WNT3	wingless-type MMTV integration site family, member 3	12782	Homo sapiens	tetraamelia-multiple malformations syndrome	INT4|MGC131950|MGC138321|MGC138323	12782	P56703	NP_110380.1
Matrisome-associated	Secreted Factors	WNT4	wingless-type MMTV integration site family, member 4	12783	Homo sapiens	mullerian aplasia and hyperandrogenism	SERKAL|WNT-4	12783	B1AJZ6:H0Y663:P56705	NP_110388.2:XP_005245954.1
Matrisome-associated	Secreted Factors	WNT4	wingless-type MMTV integration site family, member 4	12783	Homo sapiens	SERKAL syndrome	SERKAL|WNT-4	12783	B1AJZ6:H0Y663:P56705	NP_110388.2:XP_005245954.1
Matrisome-associated	Secreted Factors	WNT5A	wingless-type MMTV integration site family, member 5A	12784	Homo sapiens	autosomal dominant Robinow syndrome	hWNT5A	12784	C9J8I8:P41221	NP_001243034.1:NP_003383.2:XP_006713387.1
Matrisome-associated	Secreted Factors	WNT5A	wingless-type MMTV integration site family, member 5A	12784	Homo sapiens	autosomal dominant Robinow syndrome 1	hWNT5A	12784	C9J8I8:P41221	NP_001243034.1:NP_003383.2:XP_006713387.1
Matrisome-associated	Secreted Factors	WNT7A	wingless-type MMTV integration site family, member 7A	12786	Homo sapiens	Fuhrmann syndrome	-	12786	O00755	NP_004616.2
Matrisome-associated	Secreted Factors	WNT7A	wingless-type MMTV integration site family, member 7A	12786	Homo sapiens	phocomelia, Schinzel type	-	12786	O00755	NP_004616.2

## Sheet: COL2A1
1	Core matrisome	Collagens	COL2A1	collagen, type II, alpha 1	2200	Homo sapiens	achondrogenesis type II	ANFH|AOM|COL11A3|MGC131516|SEDC	2200	P02458	NP_001835.3:NP_149162.2
2	Core matrisome	Collagens	COL2A1	collagen, type II, alpha 1	2200	Homo sapiens	autosomal dominant rhegmatogenous retinal detachment	ANFH|AOM|COL11A3|MGC131516|SEDC	2200	P02458	NP_001835.3:NP_149162.2
3	Core matrisome	Collagens	COL2A1	collagen, type II, alpha 1	2200	Homo sapiens	avascular necrosis of femoral head, primary, 1	ANFH|AOM|COL11A3|MGC131516|SEDC	2200	P02458	NP_001835.3:NP_149162.2
4	Core matrisome	Collagens	COL2A1	collagen, type II, alpha 1	2200	Homo sapiens	Czech dysplasia, metatarsal type	ANFH|AOM|COL11A3|MGC131516|SEDC	2200	P02458	NP_001835.3:NP_149162.2
5	Core matrisome	Collagens	COL2A1	collagen, type II, alpha 1	2200	Homo sapiens	dysspondyloenchondromatosis	ANFH|AOM|COL11A3|MGC131516|SEDC	2200	P02458	NP_001835.3:NP_149162.2
6	Core matrisome	Collagens	COL2A1	collagen, type II, alpha 1	2200	Homo sapiens	familial avascular necrosis of femoral head	ANFH|AOM|COL11A3|MGC131516|SEDC	2200	P02458	NP_001835.3:NP_149162.2
7	Core matrisome	Collagens	COL2A1	collagen, type II, alpha 1	2200	Homo sapiens	hypochondrogenesis	ANFH|AOM|COL11A3|MGC131516|SEDC	2200	P02458	NP_001835.3:NP_149162.2
8	Core matrisome	Collagens	COL2A1	collagen, type II, alpha 1	2200	Homo sapiens	Kniest dysplasia	ANFH|AOM|COL11A3|MGC131516|SEDC	2200	P02458	NP_001835.3:NP_149162.2
9	Core matrisome	Collagens	COL2A1	collagen, type II, alpha 1	2200	Homo sapiens	Legg-Calve-Perthes disease	ANFH|AOM|COL11A3|MGC131516|SEDC	2200	P02458	NP_001835.3:NP_149162.2
10	Core matrisome	Collagens	COL2A1	collagen, type II, alpha 1	2200	Homo sapiens	mild spondyloepiphyseal dysplasia due to COL2A1 mutation with early-onset osteoarthritis	ANFH|AOM|COL11A3|MGC131516|SEDC	2200	P02458	NP_001835.3:NP_149162.2
11	Core matrisome	Collagens	COL2A1	collagen, type II, alpha 1	2200	Homo sapiens	multiple epiphyseal dysplasia, Beighton type	ANFH|AOM|COL11A3|MGC131516|SEDC	2200	P02458	NP_001835.3:NP_149162.2
12	Core matrisome	Collagens	COL2A1	collagen, type II, alpha 1	2200	Homo sapiens	platyspondylic dysplasia, Torrance type	ANFH|AOM|COL11A3|MGC131516|SEDC	2200	P02458	NP_001835.3:NP_149162.2
13	Core matrisome	Collagens	COL2A1	collagen, type II, alpha 1	2200	Homo sapiens	spondyloepimetaphyseal dysplasia, Strudwick type	ANFH|AOM|COL11A3|MGC131516|SEDC	2200	P02458	NP_001835.3:NP_149162.2
14	Core matrisome	Collagens	COL2A1	collagen, type II, alpha 1	2200	Homo sapiens	spondyloepiphyseal dysplasia congenita	ANFH|AOM|COL11A3|MGC131516|SEDC	2200	P02458	NP_001835.3:NP_149162.2
15	Core matrisome	Collagens	COL2A1	collagen, type II, alpha 1	2200	Homo sapiens	spondyloepiphyseal dysplasia, Stanescu type	ANFH|AOM|COL11A3|MGC131516|SEDC	2200	P02458	NP_001835.3:NP_149162.2
16	Core matrisome	Collagens	COL2A1	collagen, type II, alpha 1	2200	Homo sapiens	spondylometaphyseal dysplasia, Schmidt type	ANFH|AOM|COL11A3|MGC131516|SEDC	2200	P02458	NP_001835.3:NP_149162.2
17	Core matrisome	Collagens	COL2A1	collagen, type II, alpha 1	2200	Homo sapiens	spondyloperipheral dysplasia-short ulna syndrome	ANFH|AOM|COL11A3|MGC131516|SEDC	2200	P02458	NP_001835.3:NP_149162.2
18	Core matrisome	Collagens	COL2A1	collagen, type II, alpha 1	2200	Homo sapiens	Stickler syndrome type 1	ANFH|AOM|COL11A3|MGC131516|SEDC	2200	P02458	NP_001835.3:NP_149162.2
19	Core matrisome	Collagens	COL2A1	collagen, type II, alpha 1	2200	Homo sapiens	Stickler syndrome, type I, nonsyndromic ocular	ANFH|AOM|COL11A3|MGC131516|SEDC	2200	P02458	NP_001835.3:NP_149162.
